# Supplementary material for: Glycosylated lanthanide cyclen complexes as luminescent probes for monitoring glycosidase enzyme activity
Source: Royal Society of Chemistry journal article supplement (doi:10.1039/c6ob01712f), 2016-01-01
Supplement: c6ob01712f1.pdf [file c6ob01712f1.pdf]

## Supporting Information

### Synthesis of Glycosylated Lanthanide Cyclen Complexes as Luminescent Probes for Glycosidase Enzymes

Helen M. Burke, Thorfinnur Gunnlaugsson\* and Eoin. M. Scanlan\*

|     |                                                                         |     |
|-----|-------------------------------------------------------------------------|-----|
| I.  | Photophysical spectra and data                                          | S1  |
| II. | $^1\text{H}$ , $^{13}\text{C}$ , and HSQC spectra for all new compounds | S10 |

## I. Photophysical spectra and data

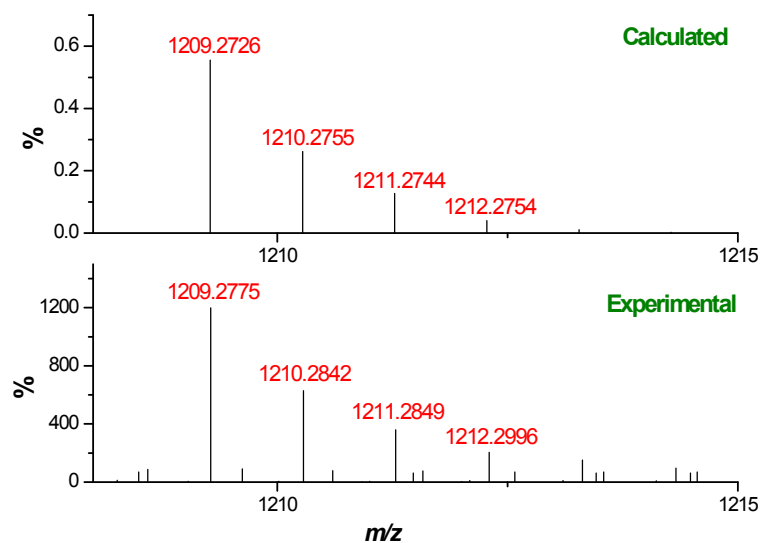

**Figure S1** (a) Experimental and (b) calculated HRMS (MALDI+) spectra of  $[1\text{Tb}][2\text{CF}_3\text{SO}_3]^+$ . Calculated for  $\text{C}_{37}\text{H}_{60}\text{N}_8\text{O}_{16}\text{F}_6\text{S}_2\text{Tb}$   $m/z = 1209.2726$   $[\text{M}+2\text{CF}_3\text{SO}_3]^+$ . Found  $m/z = 1209.2775$ .

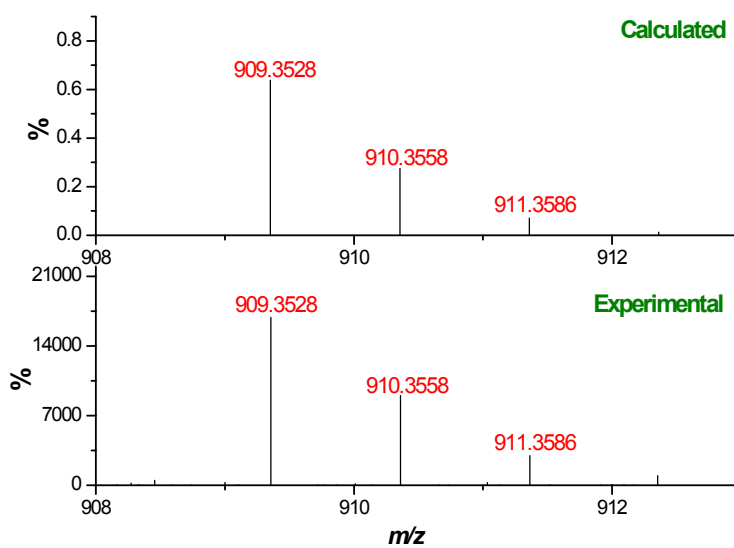

**Figure S2** (a) Experimental and (b) calculated HRMS (MALDI+) spectra of  $[2\text{Tb}][2\text{-H}]^+$ . Calculated for  $\text{C}_{35}\text{H}_{58}\text{N}_8\text{O}_{10}\text{Tb}$   $m/z = 909.3529$   $[\text{M-H}]^+$ . Found  $m/z = 909.3560$ .

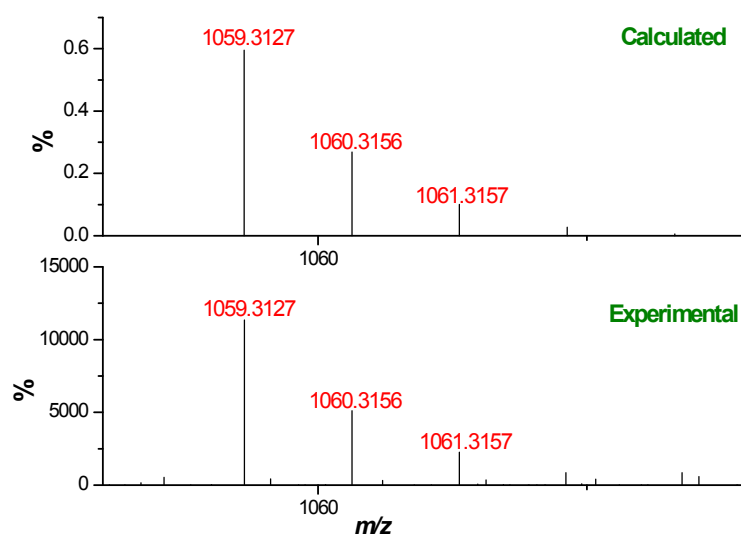

**Figure S3** (a) Experimental and (b) calculated HRMS (MALDI+) spectra of  $[3Tb][CF_3SO_3]^{2+}$ . Calculated for  $C_{36}H_{59}N_8O_{13}F_3STb$   $m/z = 1059.3128$   $[M + CF_3SO_3]^{2+}$ . Found  $m/z = 1059.3160$ .

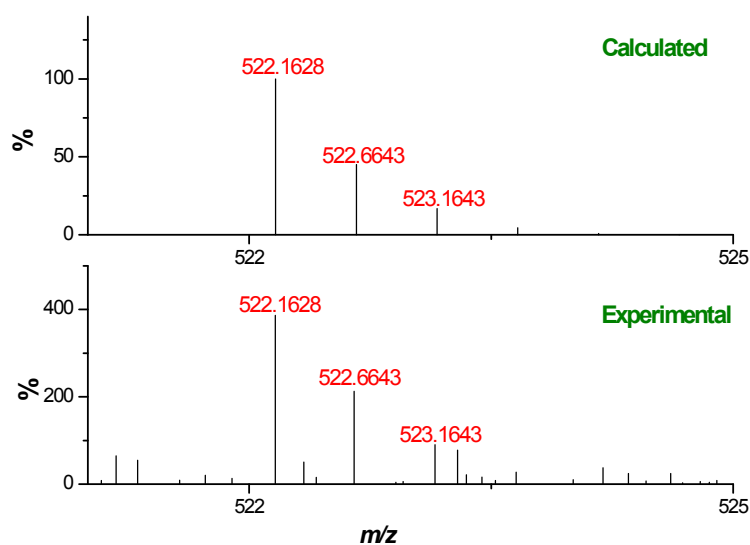

**Figure S4** (a) Experimental and (b) calculated HRMS (ESI+) spectra of  $[4Tb][CF_3SO_3]^{2+}$ . Calculated for  $C_{36}H_{60}N_8O_{12}F_3STb$   $m/z = 1044.3257$   $[M + CF_3SO_3]^{2+}$ . Found  $m/z = 1044.3254$ .

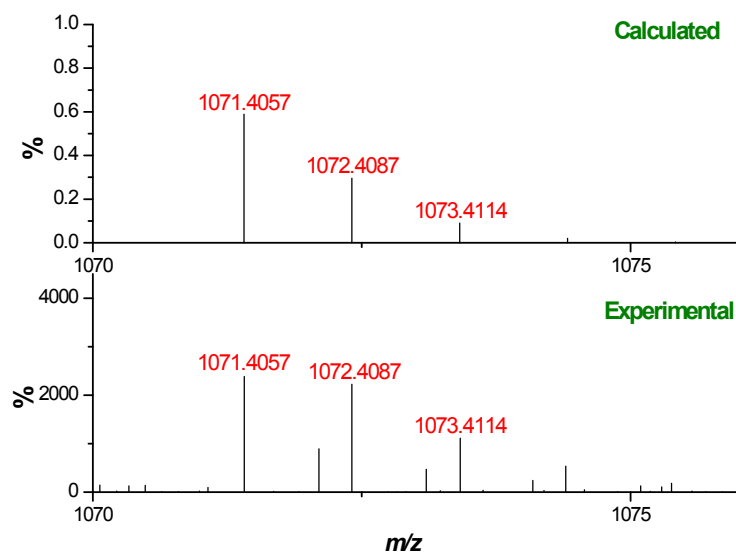

**Figure S5** (a) Experimental and (b) calculated HRMS (MALDI+) spectra of  $[5Tb][2-H]^+$ . Calculated for  $C_{41}H_{68}N_8O_{15}STb$   $m/z = 1071.4058$   $[M-2H]^+$ . Found  $m/z = 1071.4077$ .

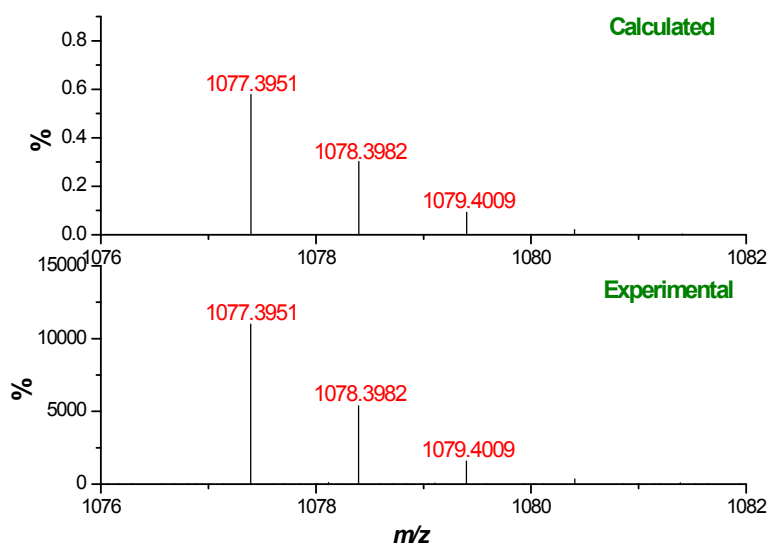

**Figure S6** (a) Experimental and (b) calculated HRMS (MALDI+) spectra of  $[6Tb][2-H]^+$ . Calculated for  $C_{43}H_{66}N_8O_{14}STb$   $m/z = 1077.3952$   $[M-2H]^+$ . Found  $m/z = 1077.3922$ .

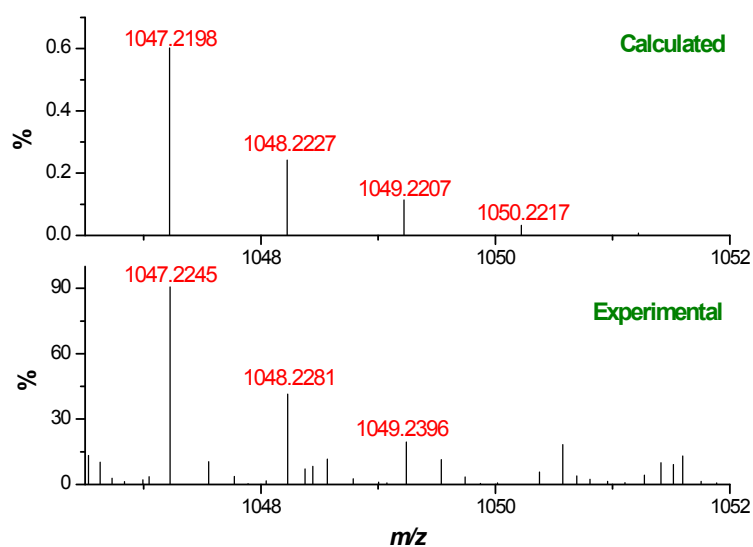

**Figure S7** (a) Experimental and (b) calculated HRMS (MALDI+) spectra of  $[7\text{Tb}][2\text{CF}_3\text{SO}_3]^+$ . Calculated for  $\text{C}_{31}\text{H}_{50}\text{N}_8\text{O}_{11}\text{F}_6\text{S}_2\text{Tb}$   $m/z = 1047.2198$   $[\text{M} + 2\text{CF}_3\text{SO}_3]^+$ . Found  $m/z = 1047.2245$ .

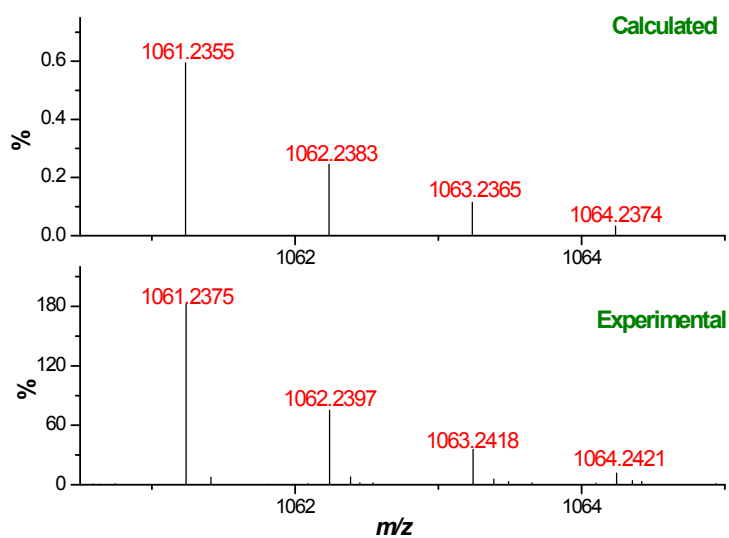

**Figure S8** (a) Experimental and (b) calculated HRMS (MALDI+) spectra of  $[8\text{Tb}][2\text{CF}_3\text{SO}_3]^+$ . Calculated for  $\text{C}_{32}\text{H}_{52}\text{N}_8\text{O}_{11}\text{F}_6\text{S}_2\text{Tb}$   $m/z = 1061.2355$   $[\text{M} + 2\text{CF}_3\text{SO}_3]^+$ . Found  $m/z = 1061.2375$ .

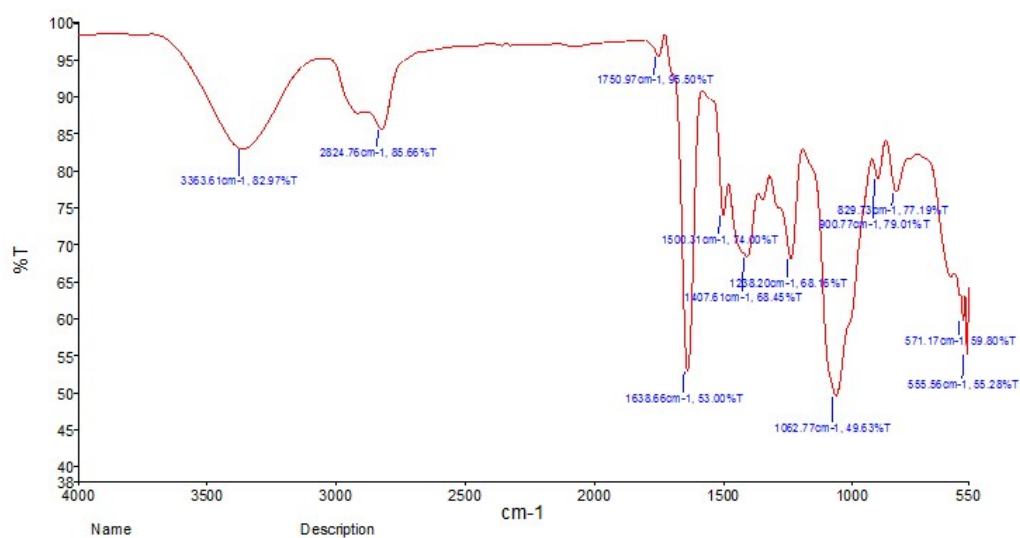

**Figure S9** IR Spectrum of ligand **7**

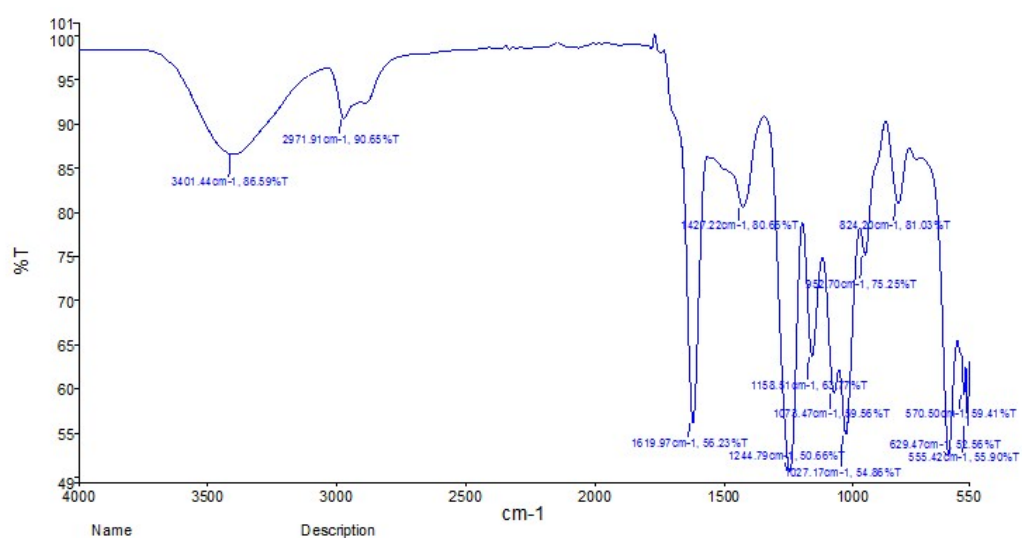

**Figure S10** IR Spectrum of Tb(III) complex **1Tb**

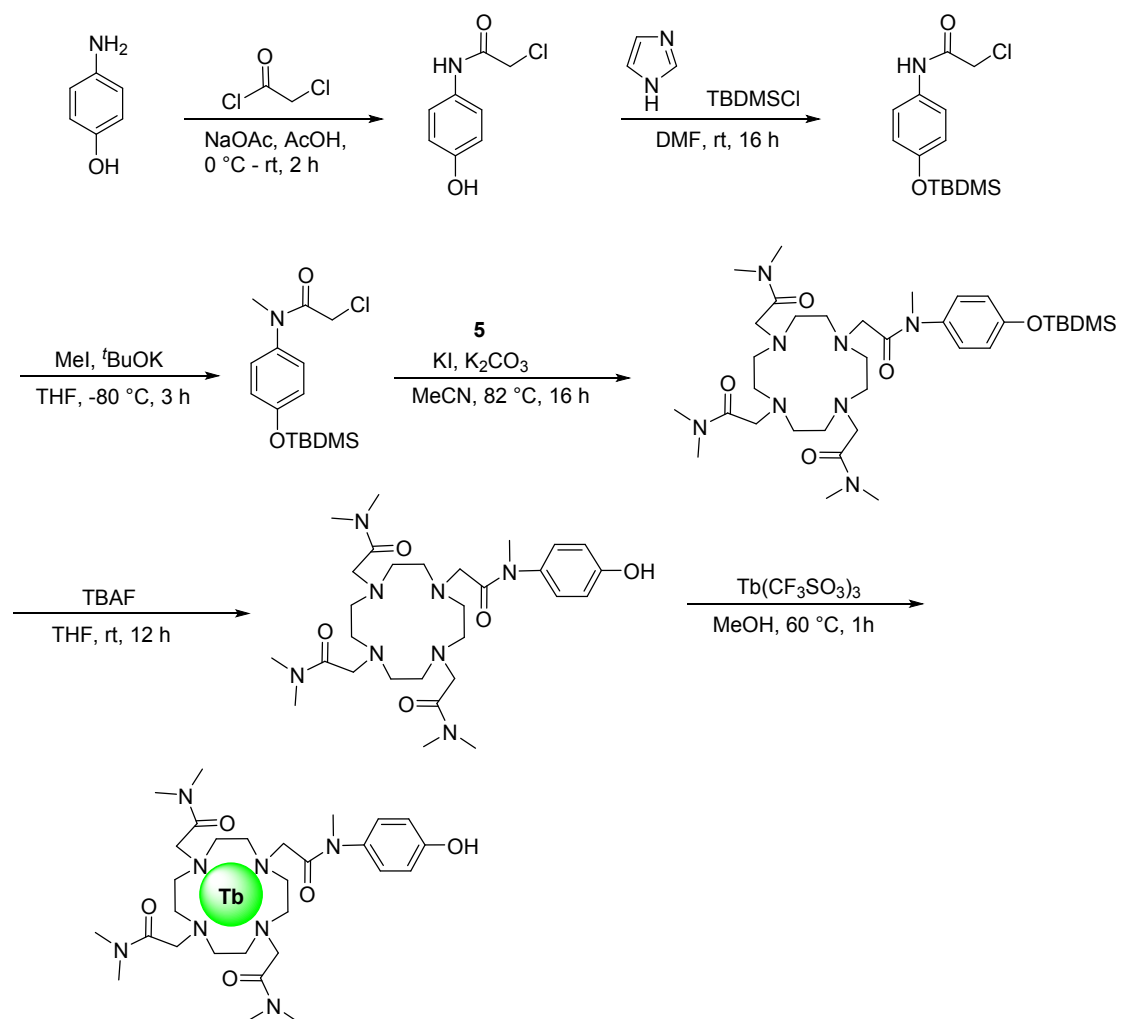

**Scheme S1** Synthetic strategy for synthesis of **7Tb**

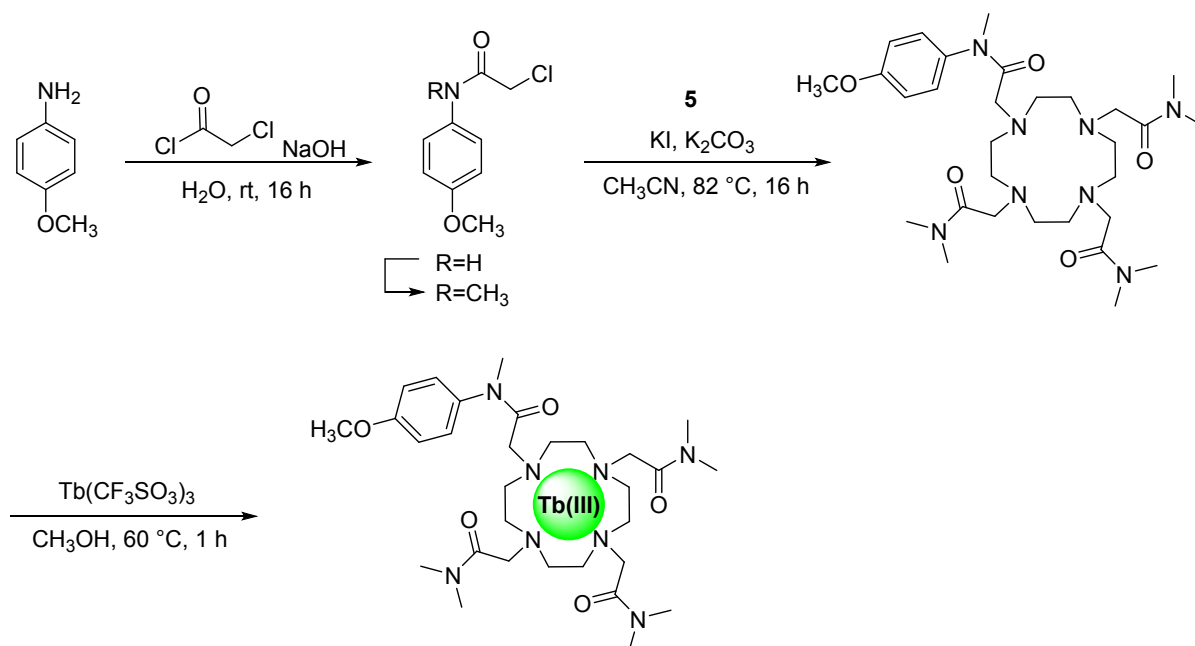

**Scheme S2** Synthetic strategy for synthesis of **8Tb**

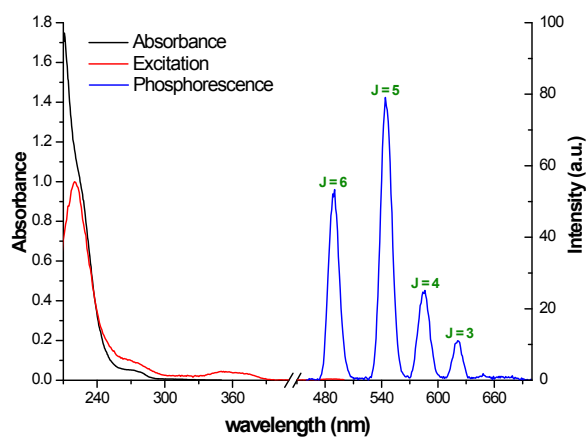

**Figure S11** UV-Vis absorption (black), excitation (red), and sensitised Tb(III) luminescence spectra (blue) of **1Tb** (50  $\mu$ M) in aqueous buffered solution (0.1M Tris-HCl, pH 7.4) using indirect excitation at 273 nm.

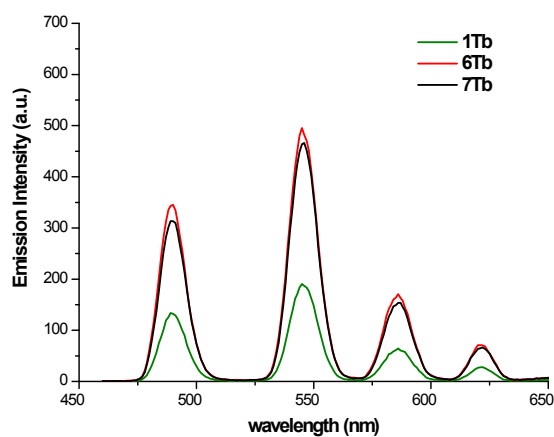

**Figure S12** Lanthanide luminescence spectra of **1Tb** (green), **6Tb\*** (red), **7Tb** (black) (1 mM) in aqueous buffered solution (0.1M Tris-HCl, pH 7.4) using indirect excitation at 273 nm. \*10%EtOH added to aid solubility

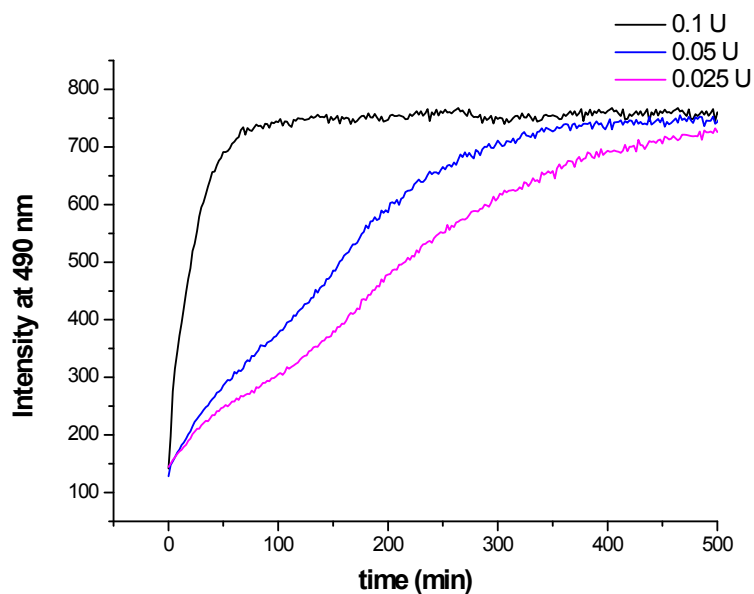

**Figure S13** Lanthanide luminescence spectra of **1.Tb** (1 mM) in the presence of varying amounts of  $\beta$ -glucosidase (0.1 U – 0.025 U) in aqueous buffered solution (0.1M Tris-HCl, pH 7.4) using indirect excitation at 273 nm

**Table S1** The lifetimes and the corresponding hydration states ( $q$ ) of the Tb(III) complexes at concentrations of 1mM. Luminescence decay measured at 545 nm.

| Complex                   | $\tau$ (D <sub>2</sub> O)/ms | $\tau$ (H <sub>2</sub> O)/ms | $q$ ( $\pm 0.5$ ) |
|---------------------------|------------------------------|------------------------------|-------------------|
| <b>1.Tb<sup>a</sup></b>   | 1.19                         | 0.93                         | 0.89              |
| <b>1.Tb<sup>b</sup></b>   | 2.33                         | 1.86                         | 0.24              |
| <b>2.Tb<sup>b</sup></b>   | 2.34                         | 1.77                         | 0.39              |
| <b>3.Tb<sup>b</sup></b>   | 2.21                         | 1.82                         | 0.18              |
| <b>4.Tb<sup>b</sup></b>   | 1.56                         | 1.27                         | 0.44              |
| <b>5.Tb<sup>b</sup></b>   | 2.17                         | 1.66                         | 0.41              |
| <b>6.Tb<sup>b,c</sup></b> | 2.36                         | 1.64                         | 0.62              |
| <b>7.Tb<sup>b</sup></b>   | 2.03                         | 1.38                         | 0.85              |

<sup>a</sup> Lifetime measured immediately

<sup>b</sup> Lifetime measured after 1 h standing in solution

<sup>c</sup> 10% MeOH and MeOD added to aid solubility

Hydration states of the Tb(III) complexes were determined by measuring their luminescence lifetimes in H<sub>2</sub>O and D<sub>2</sub>O, using the Parker-modified Horrock's equation

$$q^{\text{Ln(III)}} = A \{ (1/\tau_{\text{H}_2\text{O}} - 1/\tau_{\text{D}_2\text{O}}) - B - C \} \quad , \text{where for Tb(III), } A = 5, B = 0.06, C = 0$$

II.  $^1\text{H}$ ,  $^{13}\text{C}$ , and HSQC spectra for all new compounds

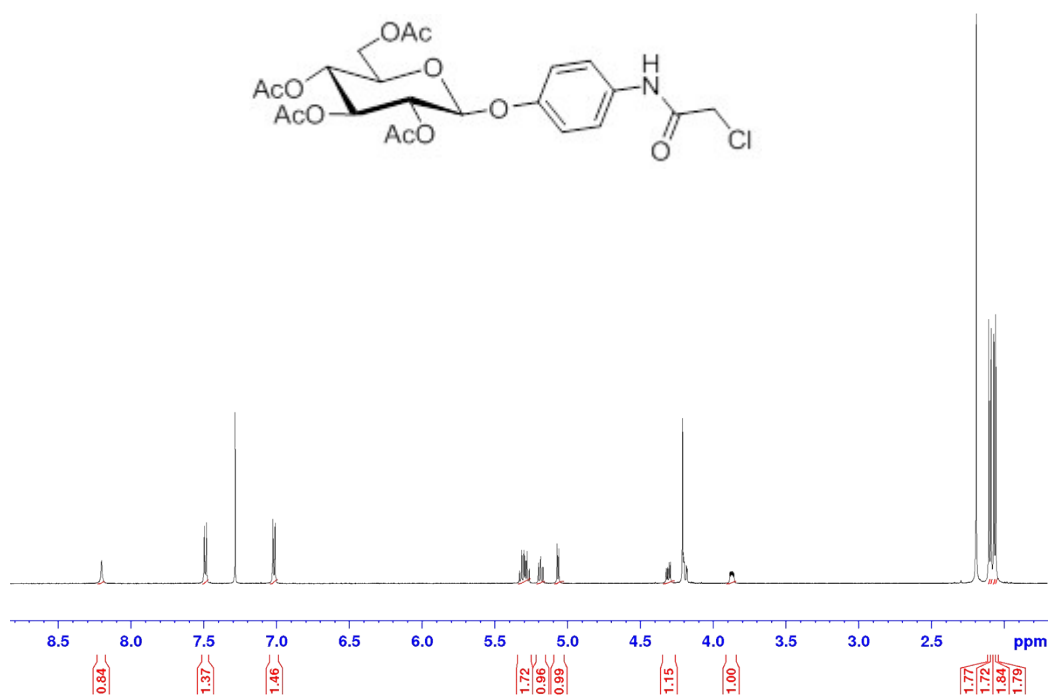

Figure S14  $^1\text{H}$  NMR Spectrum of **3**, CDCl<sub>3</sub>, 400 MHz

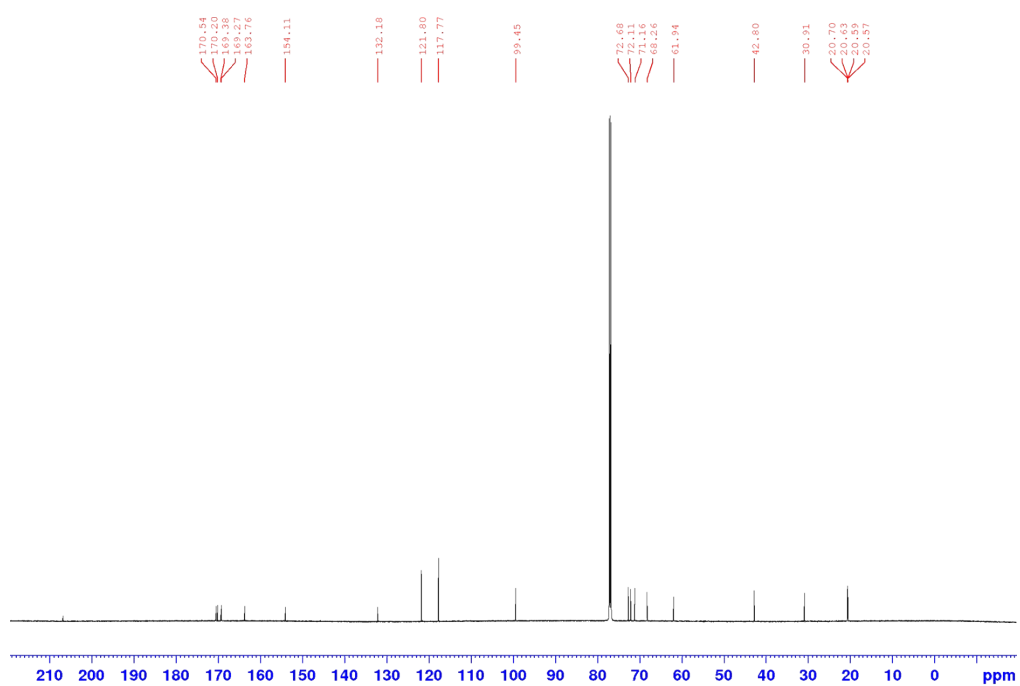

Figure S15  $^{13}\text{C}$  NMR Spectrum of **3**, CDCl<sub>3</sub>, 101 MHz

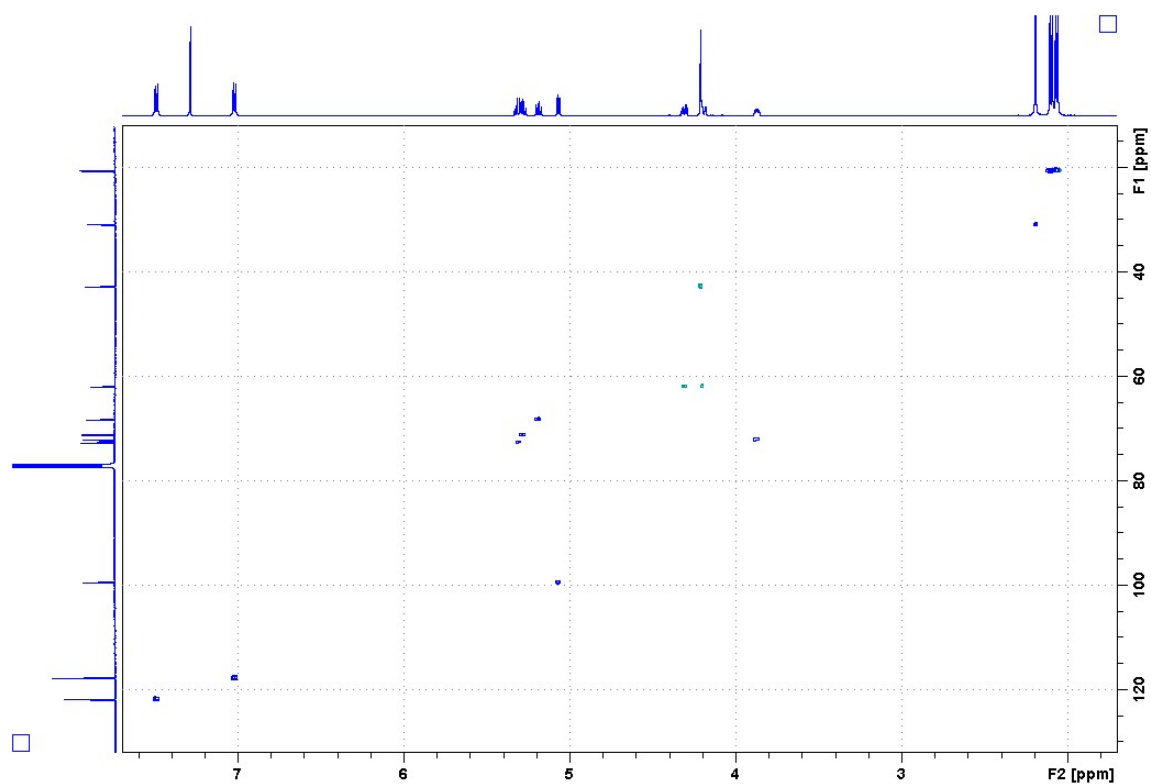

**Figure S16** HSQC NMR Spectrum of **3**,  $\text{CDCl}_3$ , 101 MHz

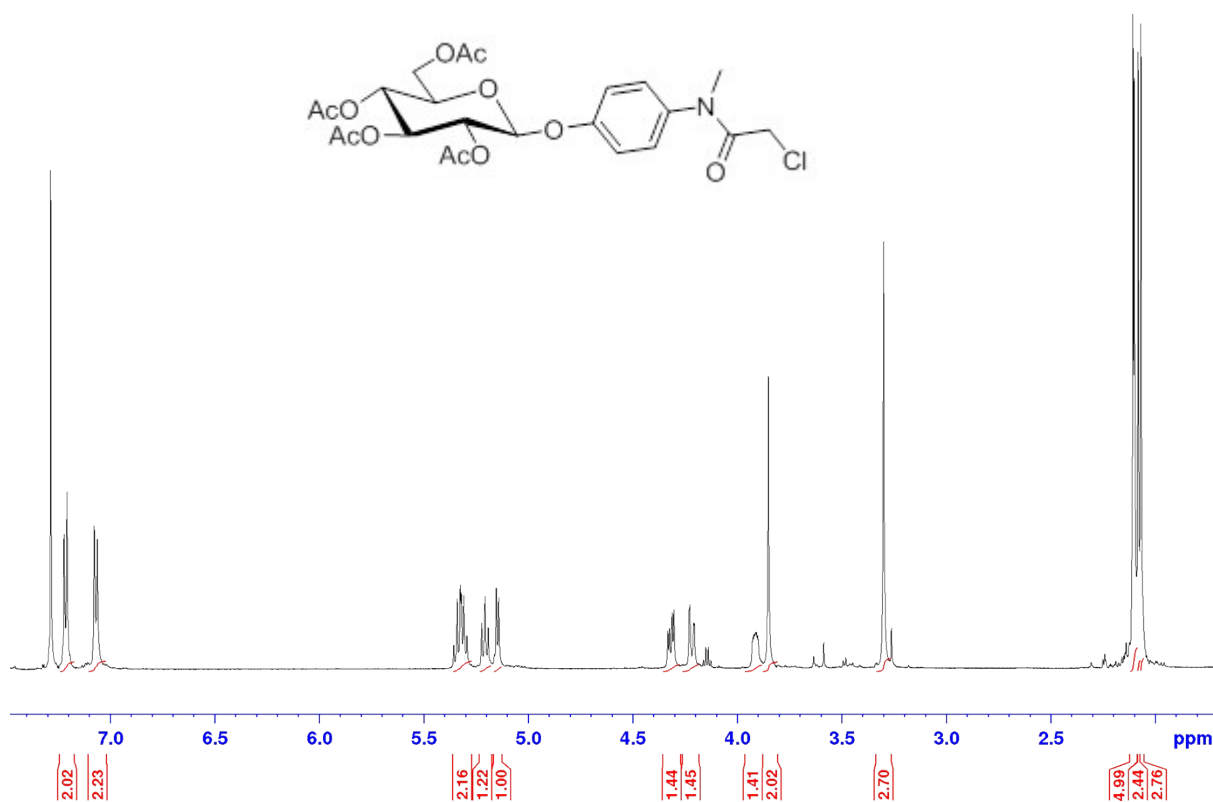

**Figure S17**  $^1\text{H}$  NMR Spectrum of **4**,  $\text{CDCl}_3$ , 600 MHz

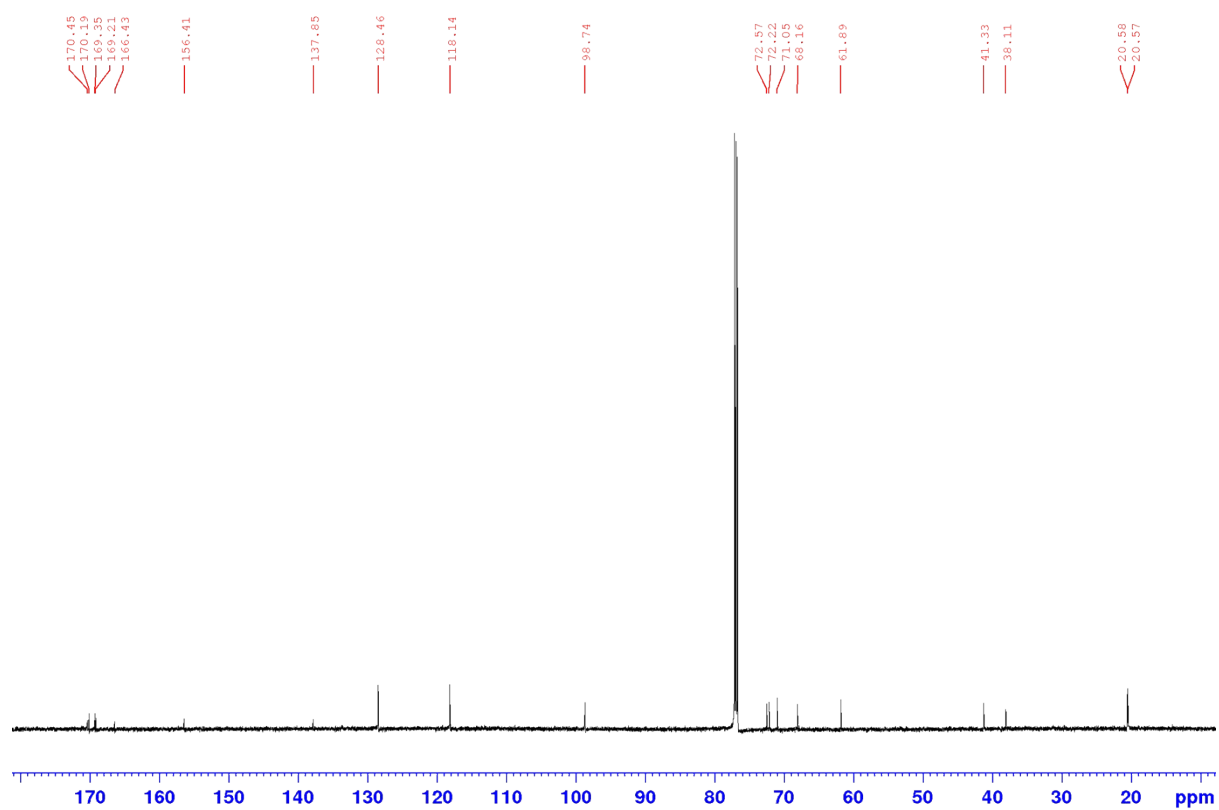

**Figure S18**  $^{13}\text{C}$  NMR Spectrum of **4**,  $\text{CDCl}_3$ , 101 MHz

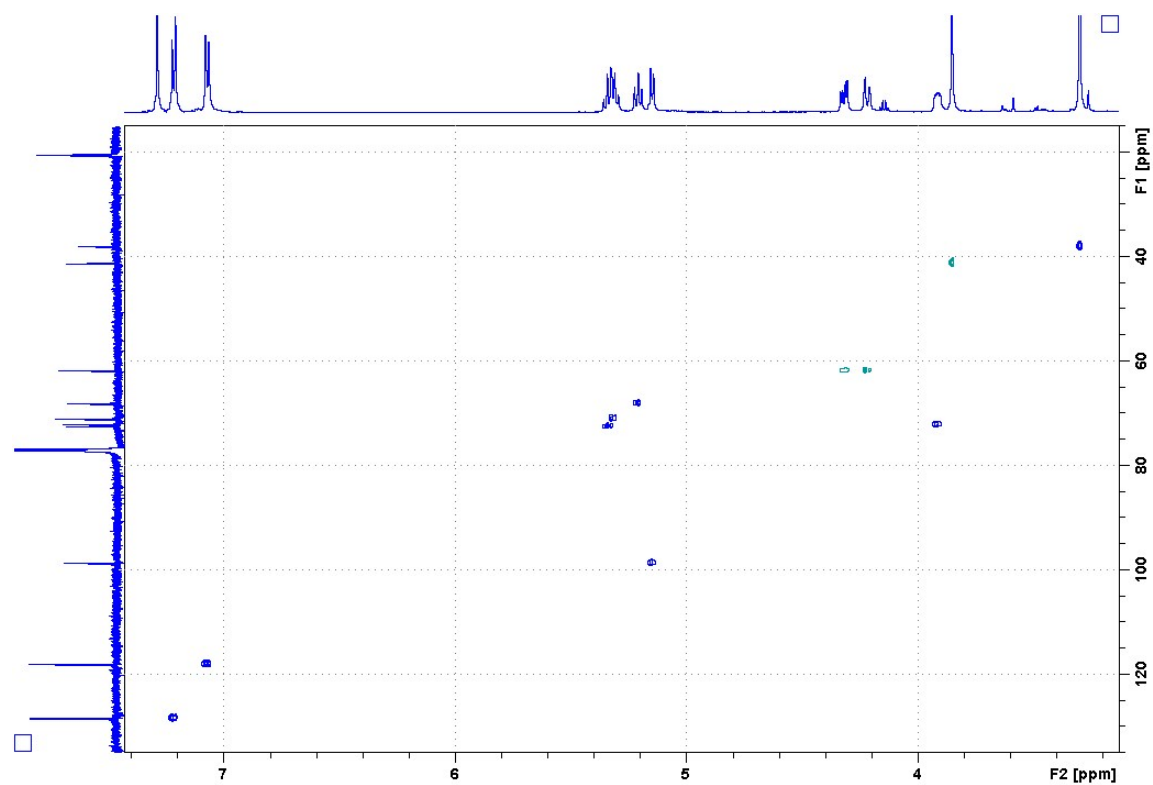

**Figure S19** HSQC NMR Spectrum of **4**,  $\text{CDCl}_3$ , 101 MHz

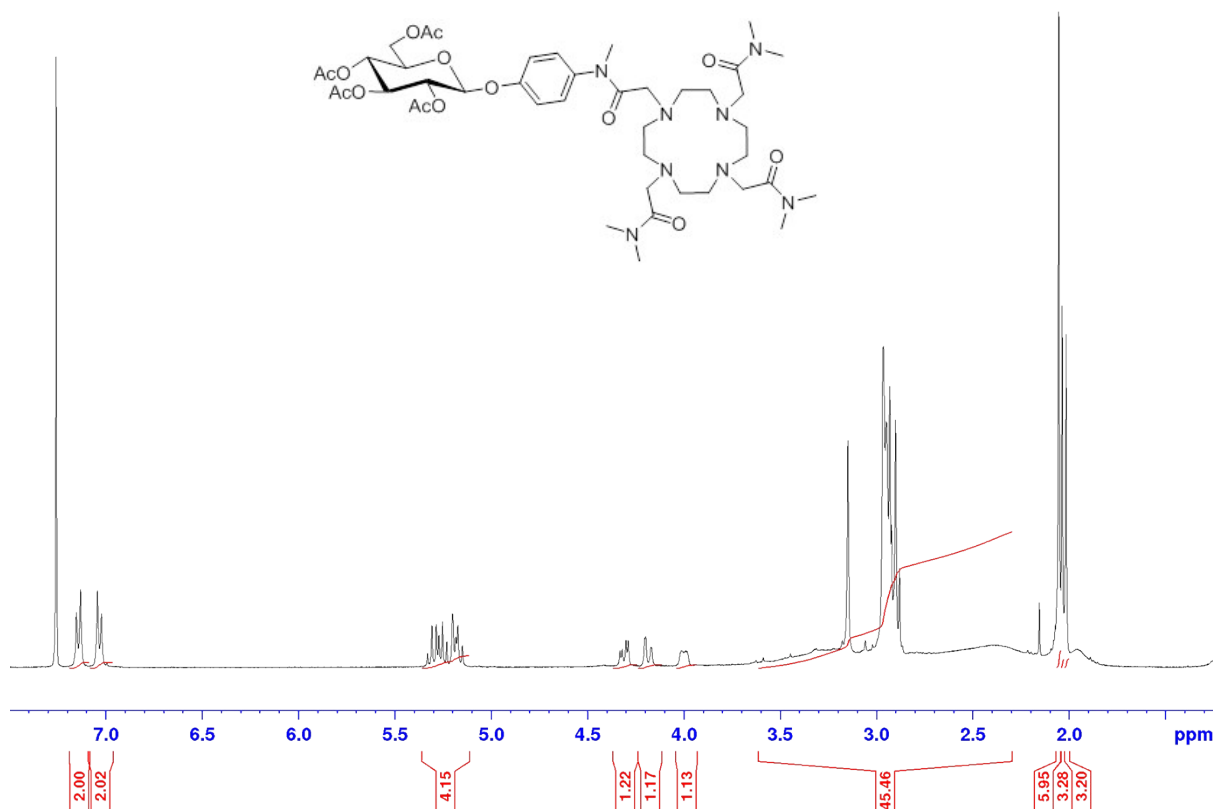

Figure S20 <sup>1</sup>H NMR Spectrum of 6, CDCl<sub>3</sub>, 600 MHz

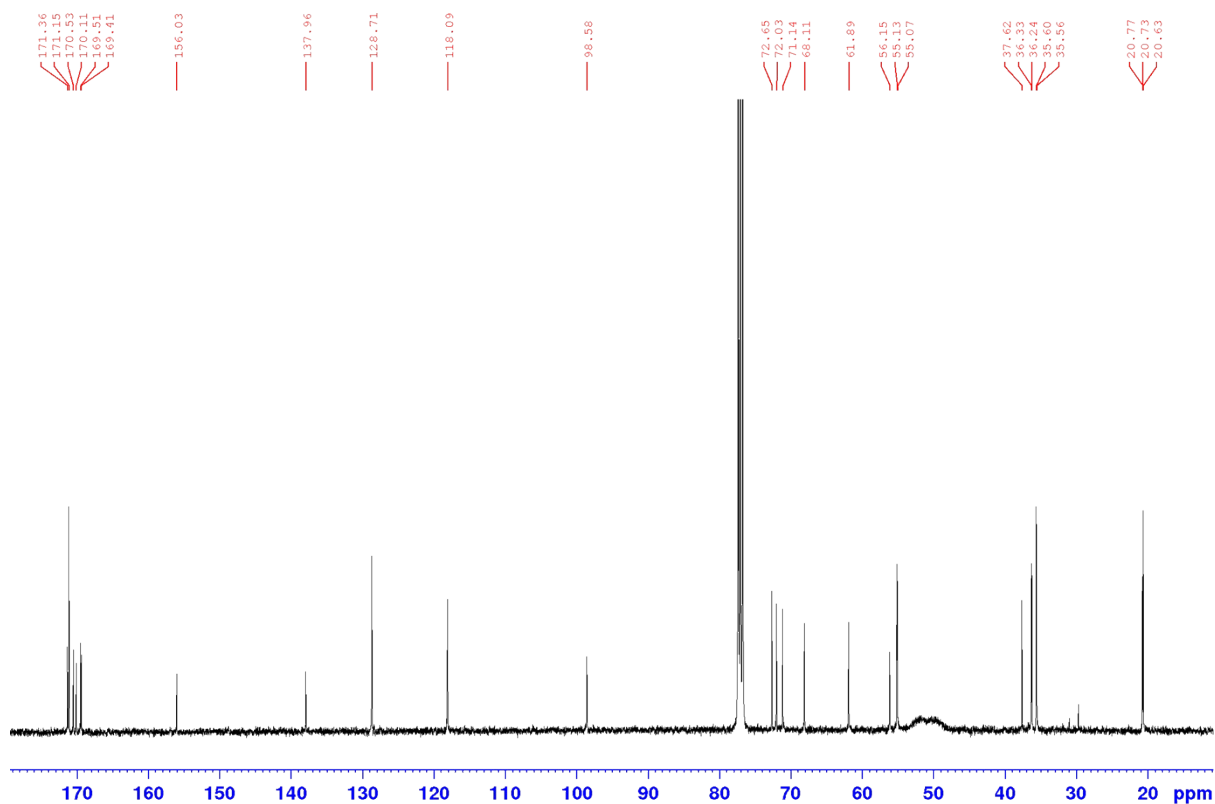

Figure S21 <sup>13</sup>C NMR Spectrum of 6, CDCl<sub>3</sub>, 101 MHz

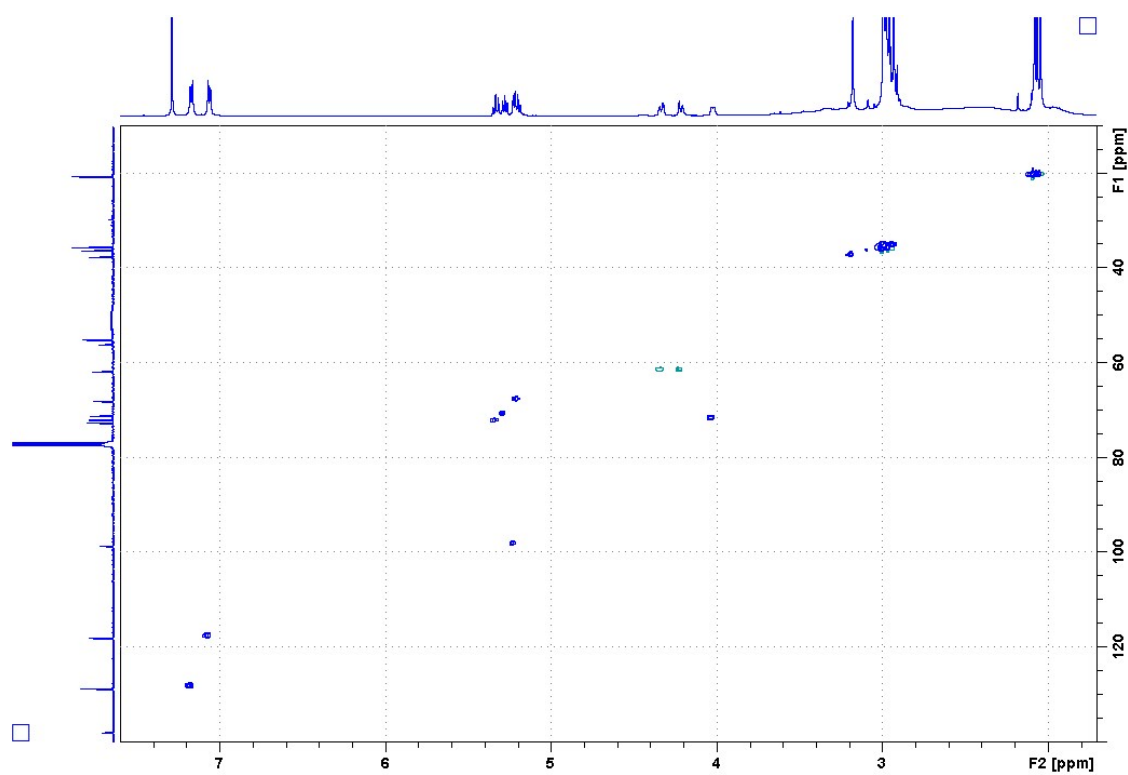

**Figure S22** HSQC NMR Spectrum of **6**,  $\text{CDCl}_3$ , 101 MHz

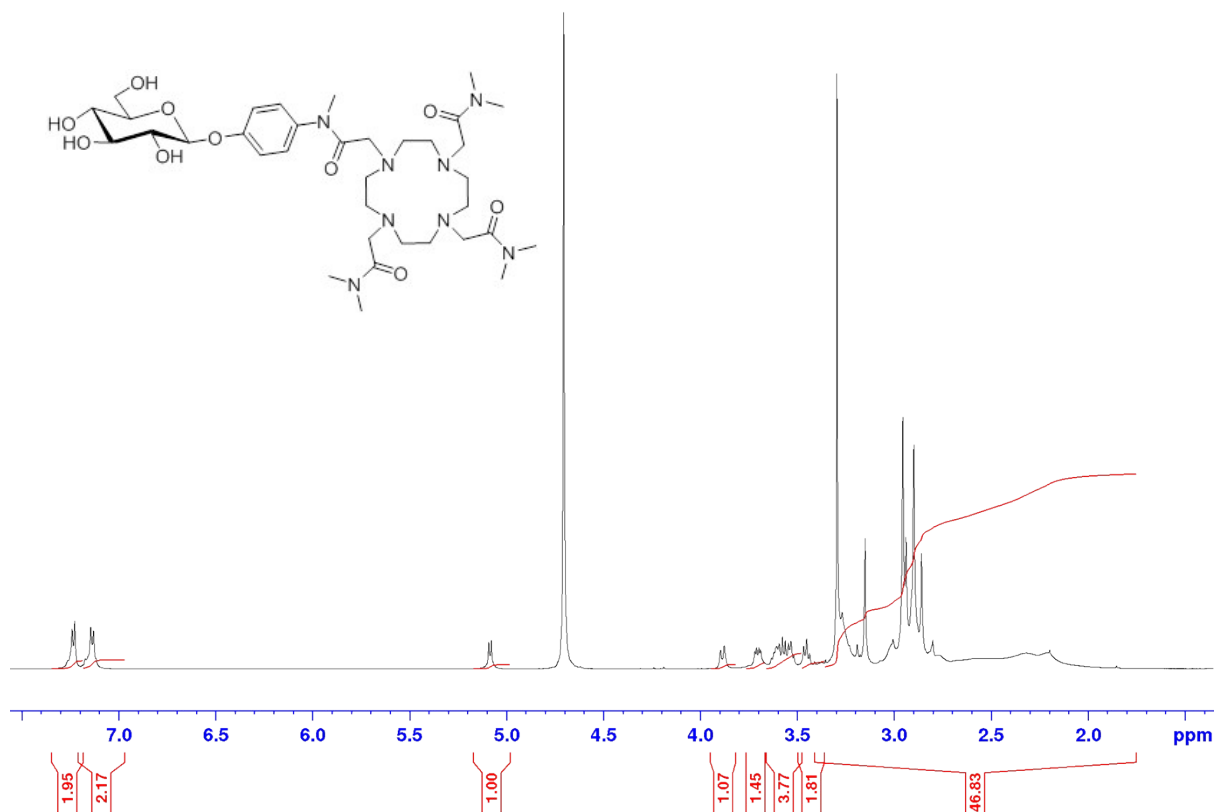

**Figure S23**  $^1\text{H}$  NMR Spectrum of **7**,  $\text{D}_2\text{O}$ , 600 MHz

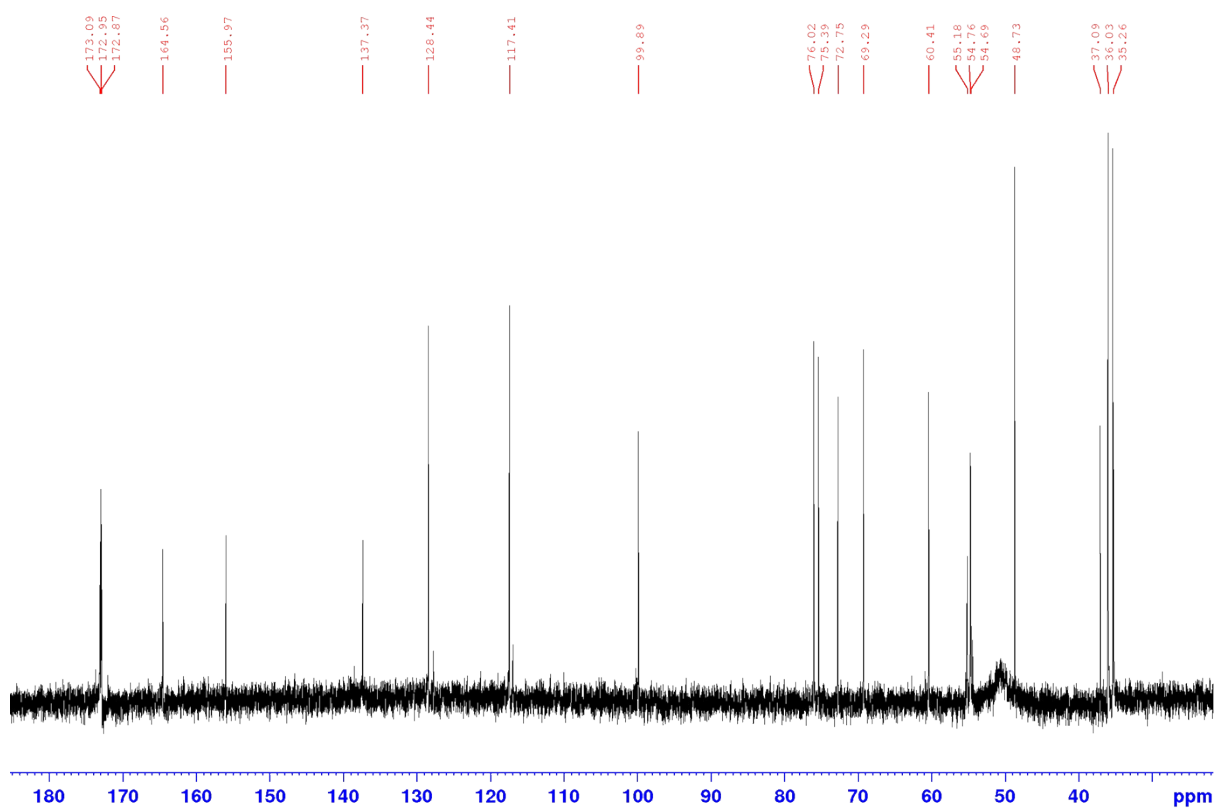

**Figure S24**  $^{13}\text{C}$  NMR Spectrum of **7**,  $\text{D}_2\text{O}$ , 101 MHz

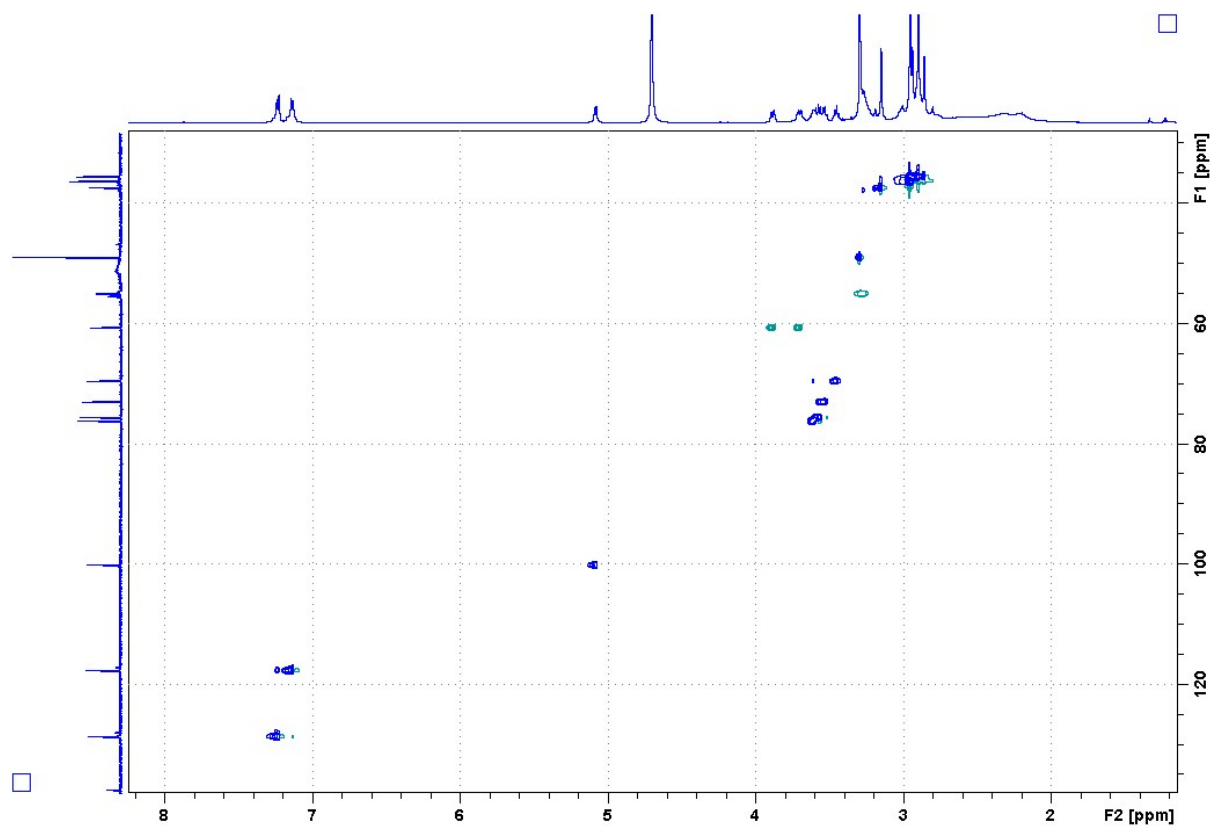

**Figure S25** HSQC NMR Spectrum of **7**,  $\text{D}_2\text{O}$ , 101 MHz

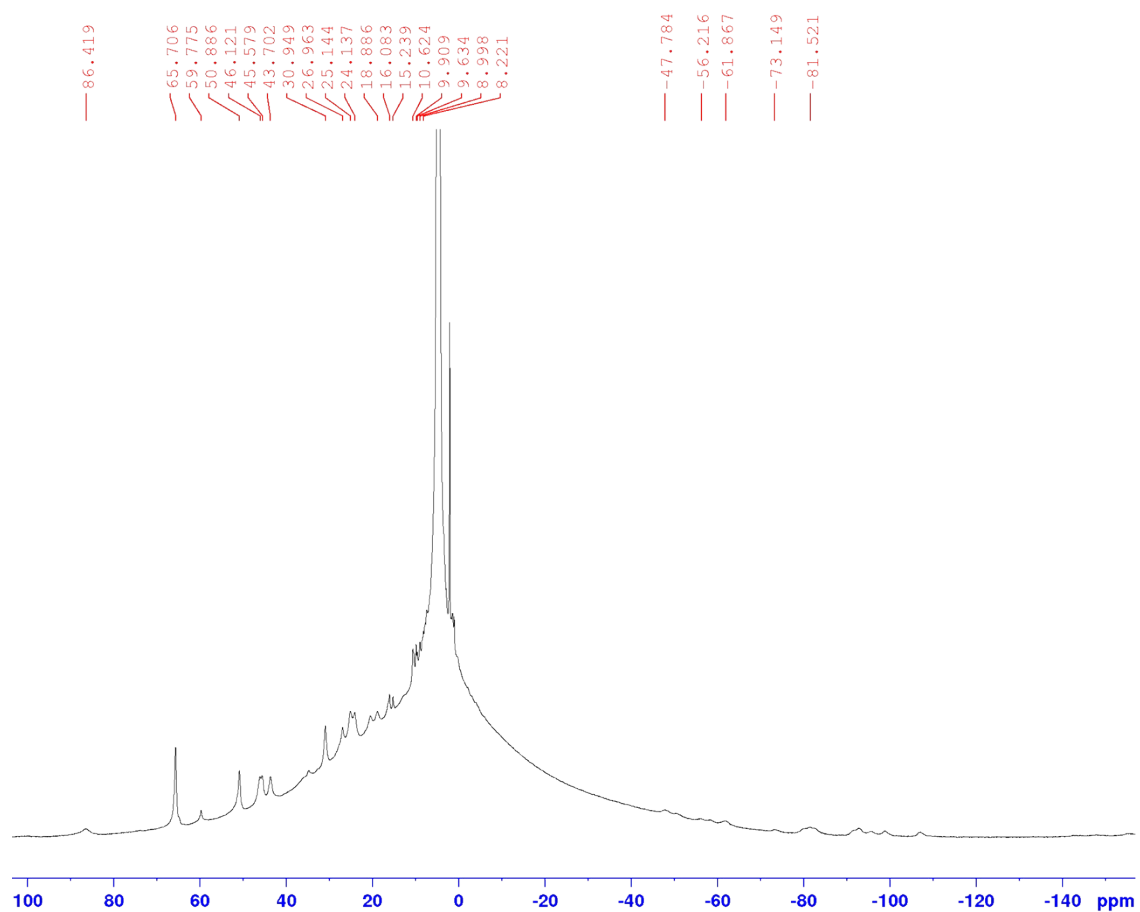

Figure S26  $^1\text{H}$  NMR Spectrum of **1Tb**,  $\text{D}_2\text{O}$ , 400 MHz

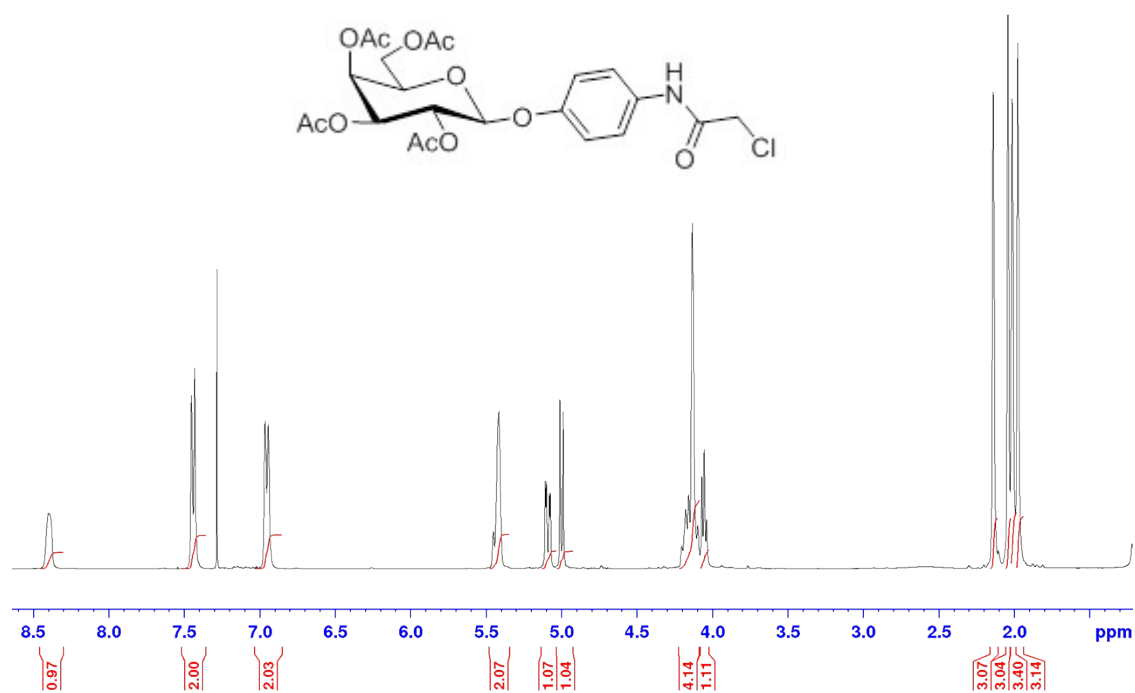

Figure S27  $^1\text{H}$  NMR Spectrum of **10**,  $\text{CDCl}_3$ , 400 MHz

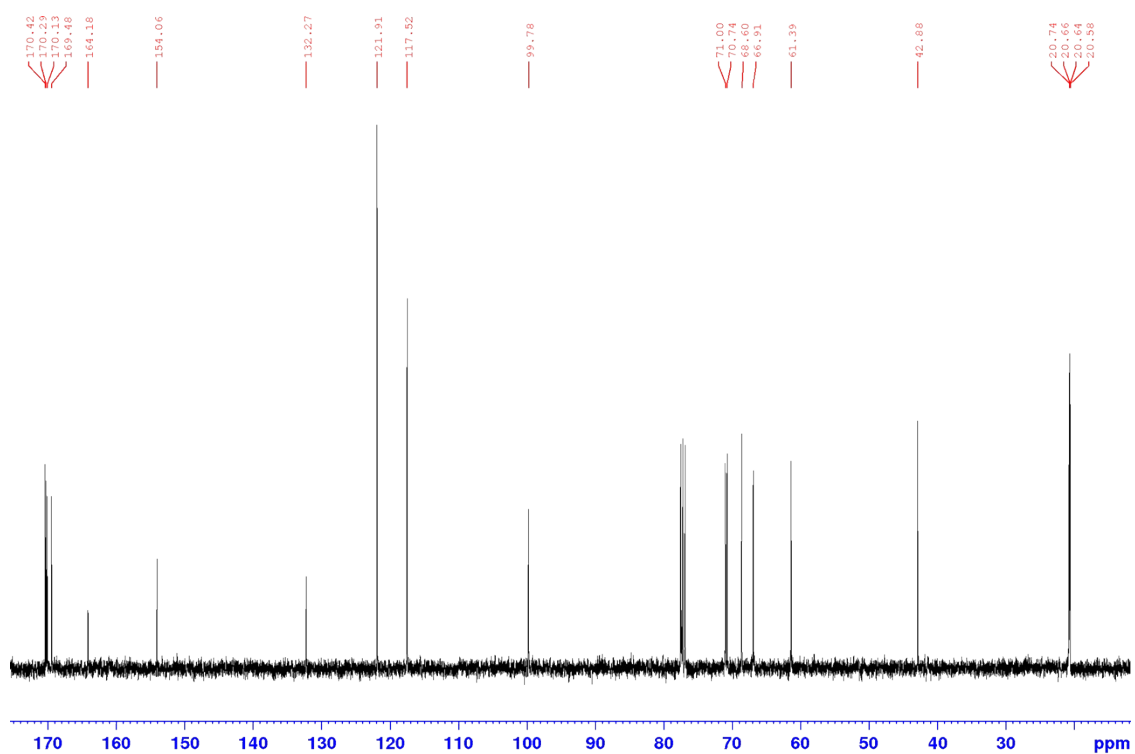

**Figure S28** <sup>13</sup>C NMR Spectrum of **10**, CDCl<sub>3</sub>, 101 MHz

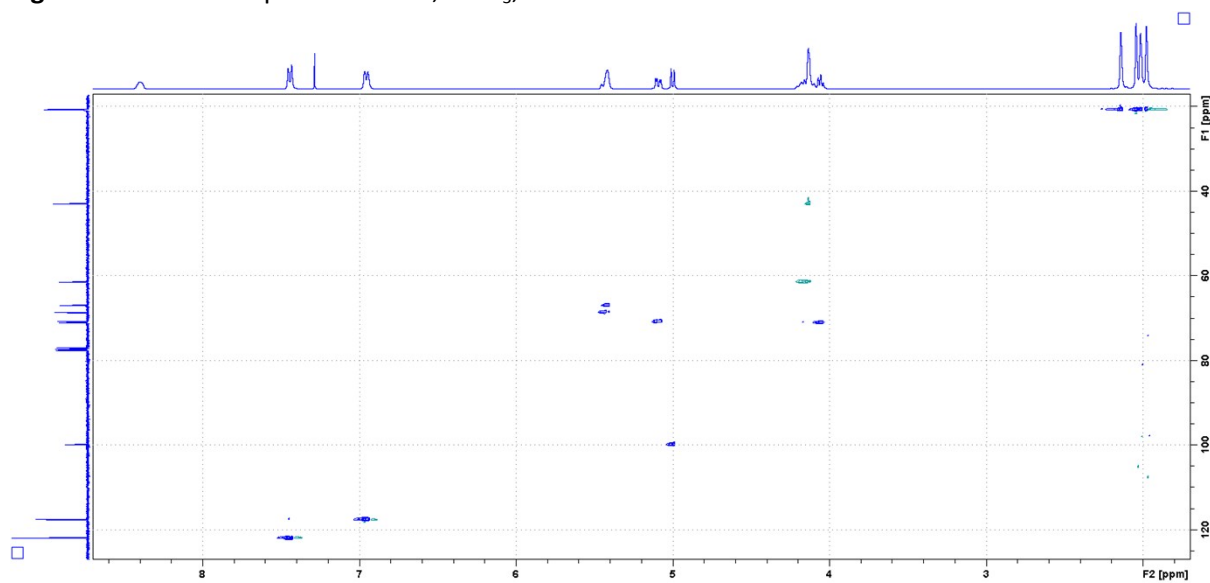

**Figure S29** HSQC NMR Spectrum of **10**, CDCl<sub>3</sub>, 101 MHz

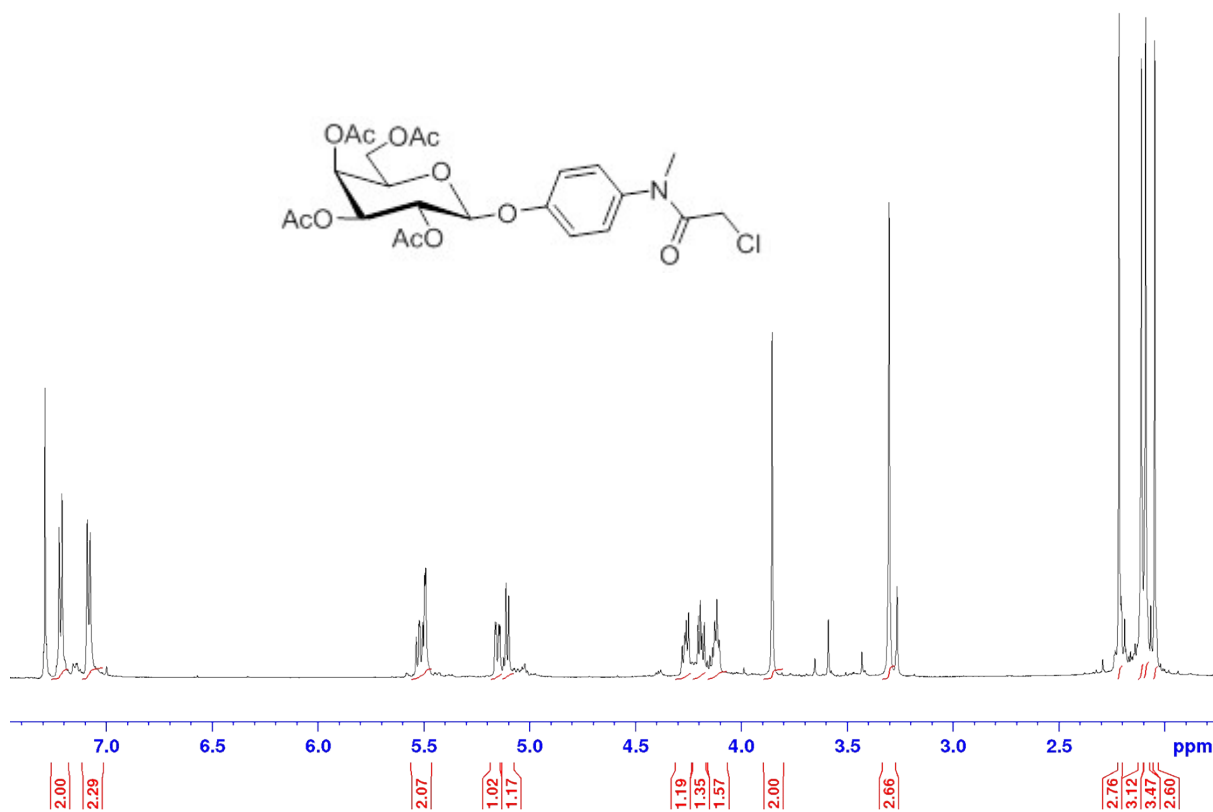

**Figure S30** <sup>1</sup>H NMR Spectrum of **11**, CDCl<sub>3</sub>, 400 MHz

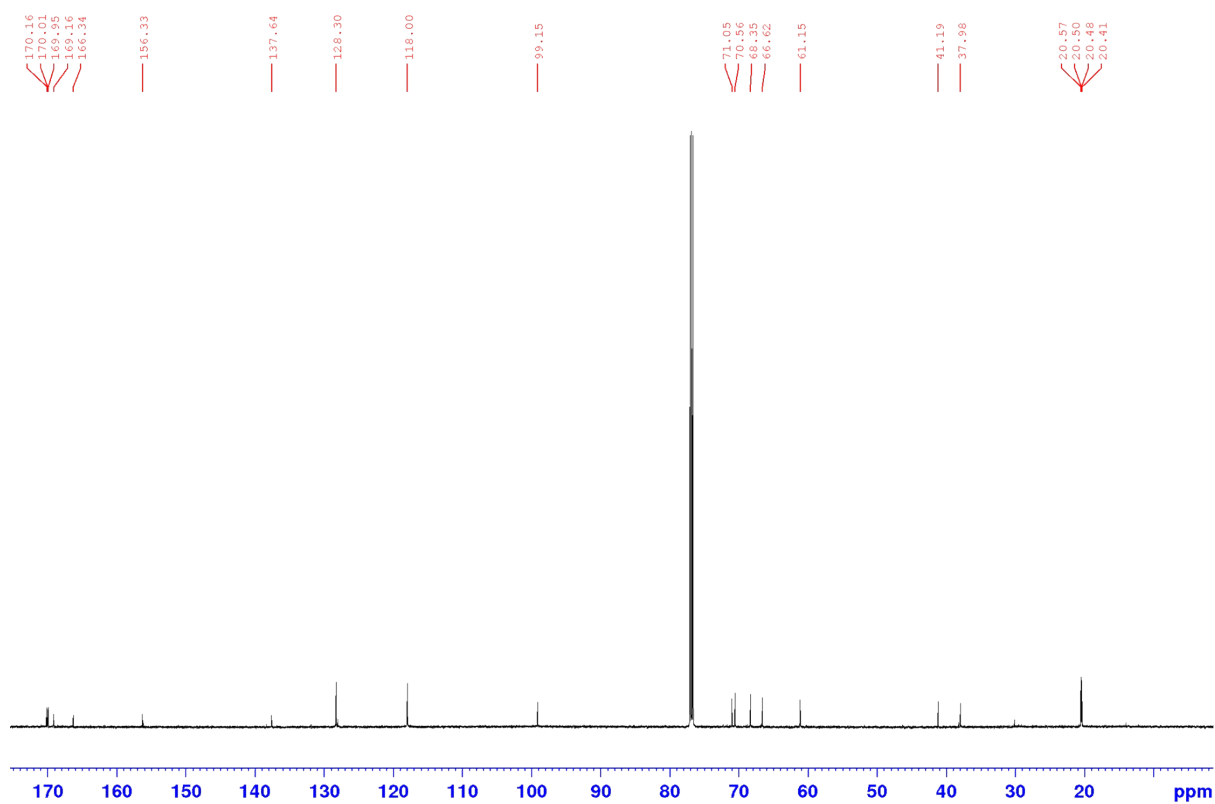

**Figure S31** <sup>13</sup>C NMR Spectrum of **11**, CDCl<sub>3</sub>, 101 MHz

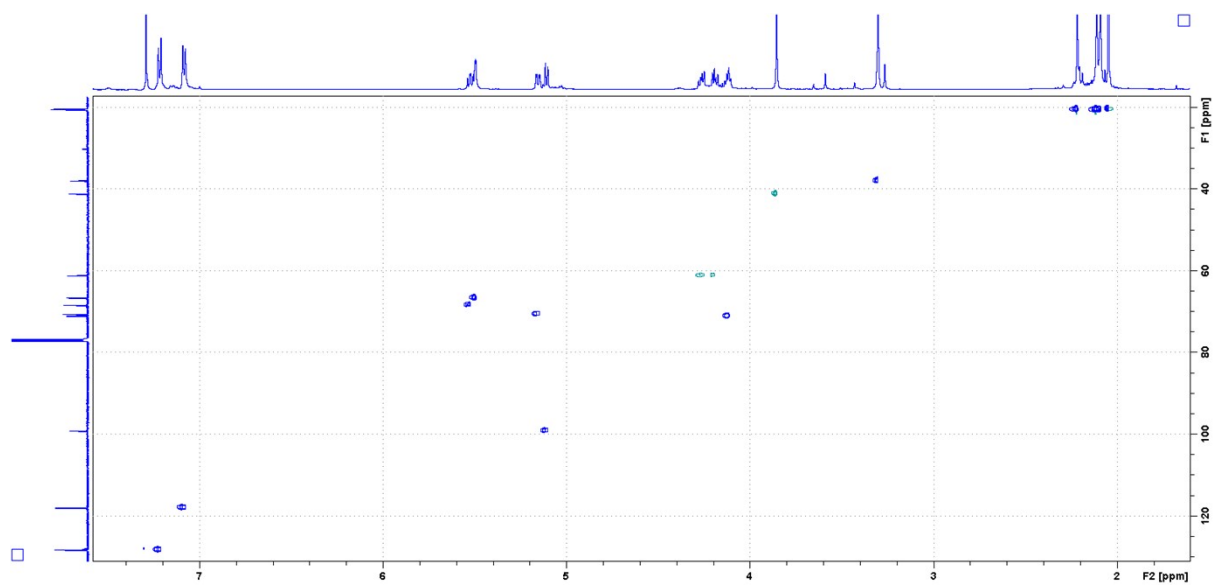

**Figure S32** HSQC NMR Spectrum of **11**,  $\text{CDCl}_3$ , 101MHz

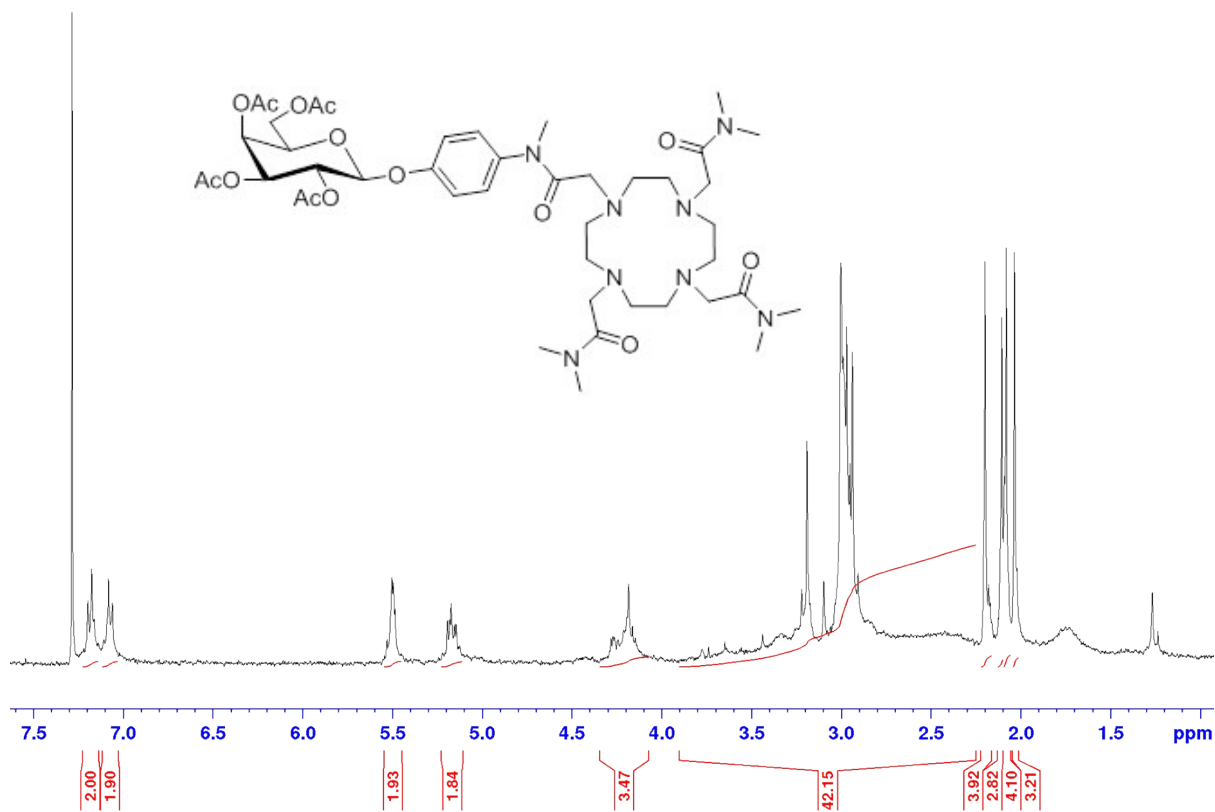

**Figure S33**  $^1\text{H}$  NMR Spectrum of **12**,  $\text{CDCl}_3$ , 400 MHz

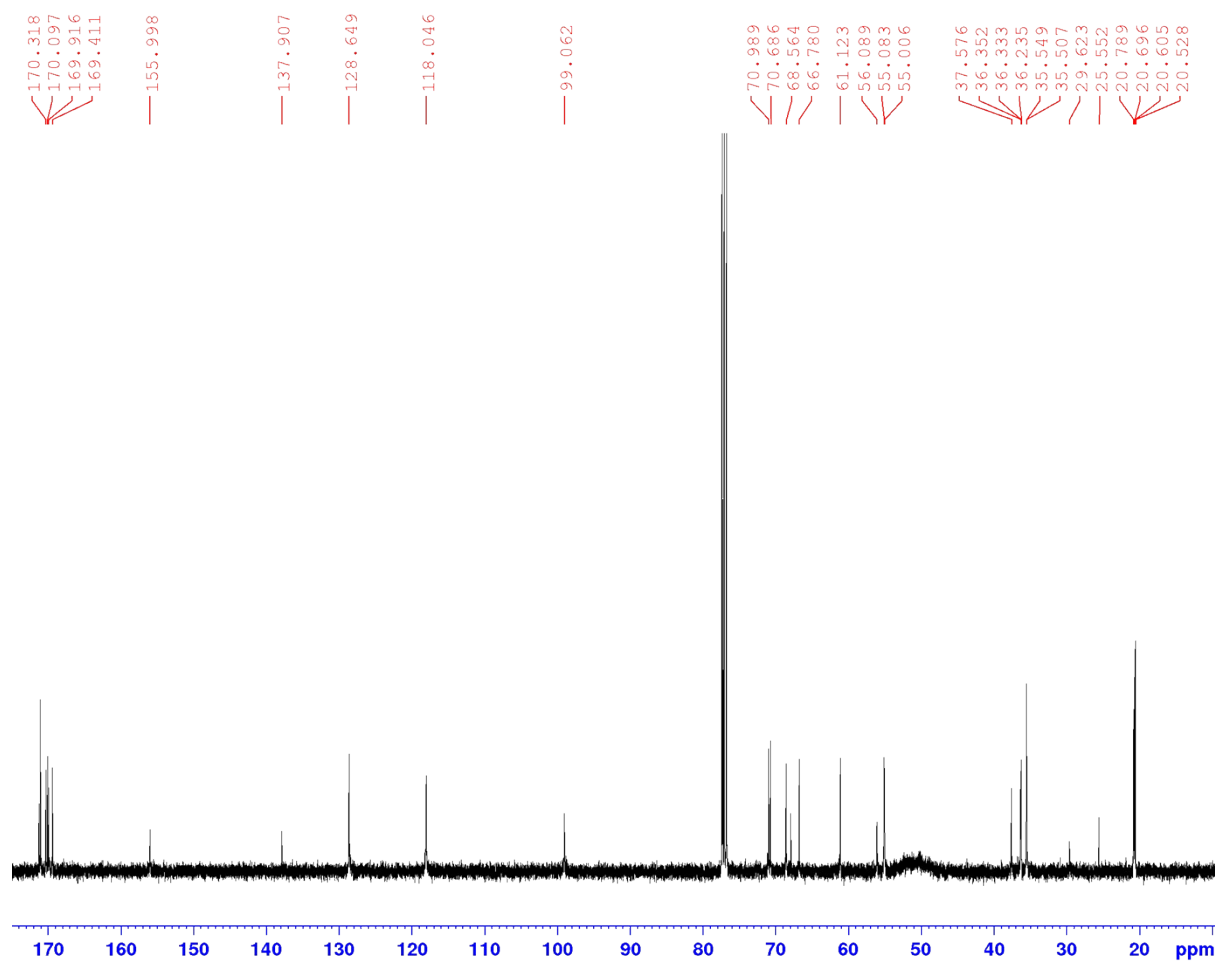

**Figure S34**  $^{13}\text{C}$  NMR Spectrum of **12**,  $\text{CDCl}_3$ , 101 MHz

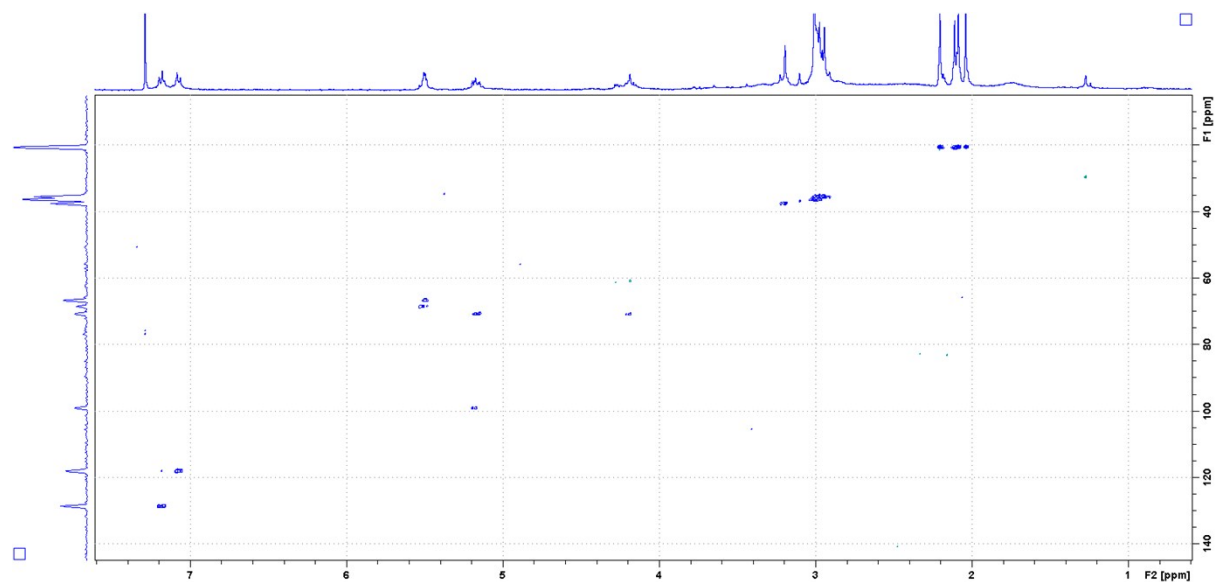

**Figure S35** HSQC NMR Spectrum of **12**,  $\text{CDCl}_3$ , 101 MHz

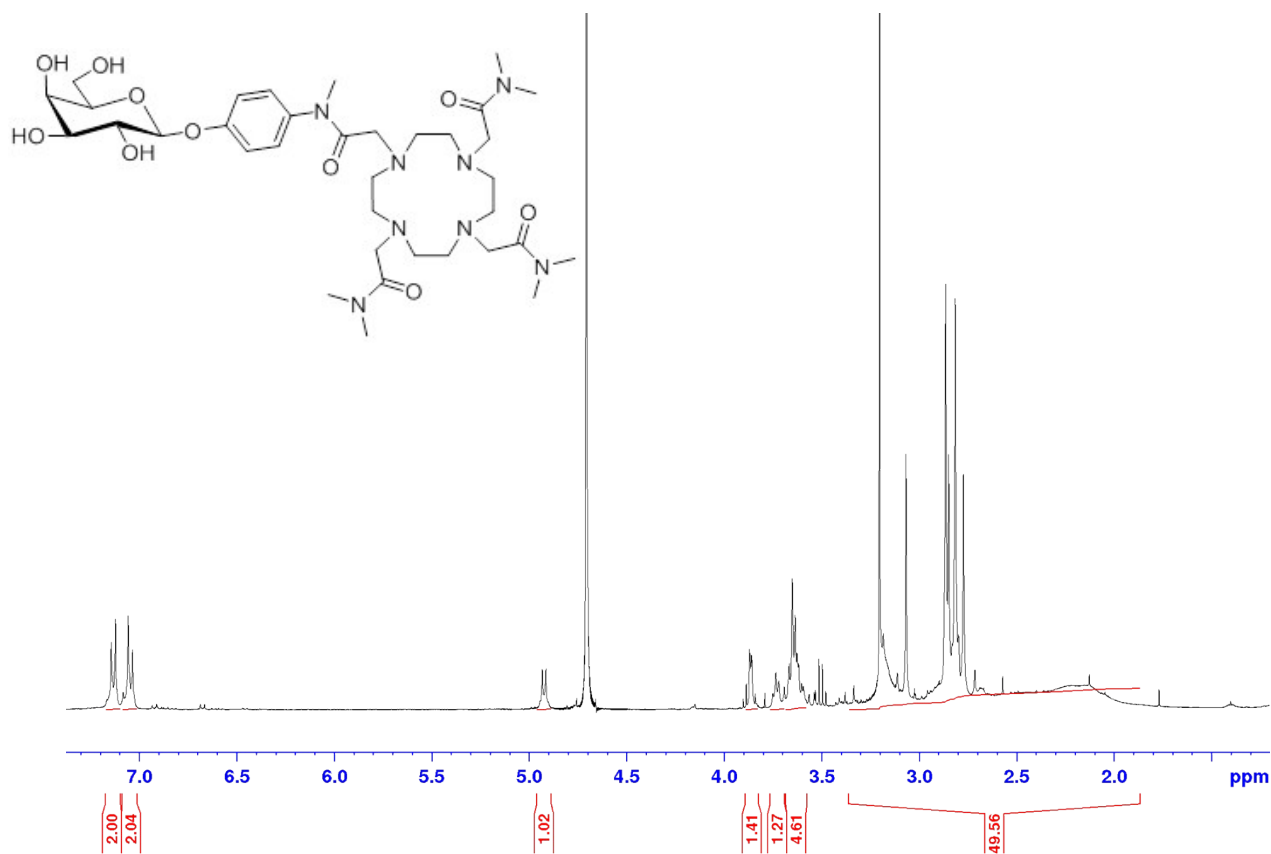

**Figure S36**  $^1\text{H}$  NMR Spectrum of **13**,  $\text{D}_2\text{O}$  400 MHz

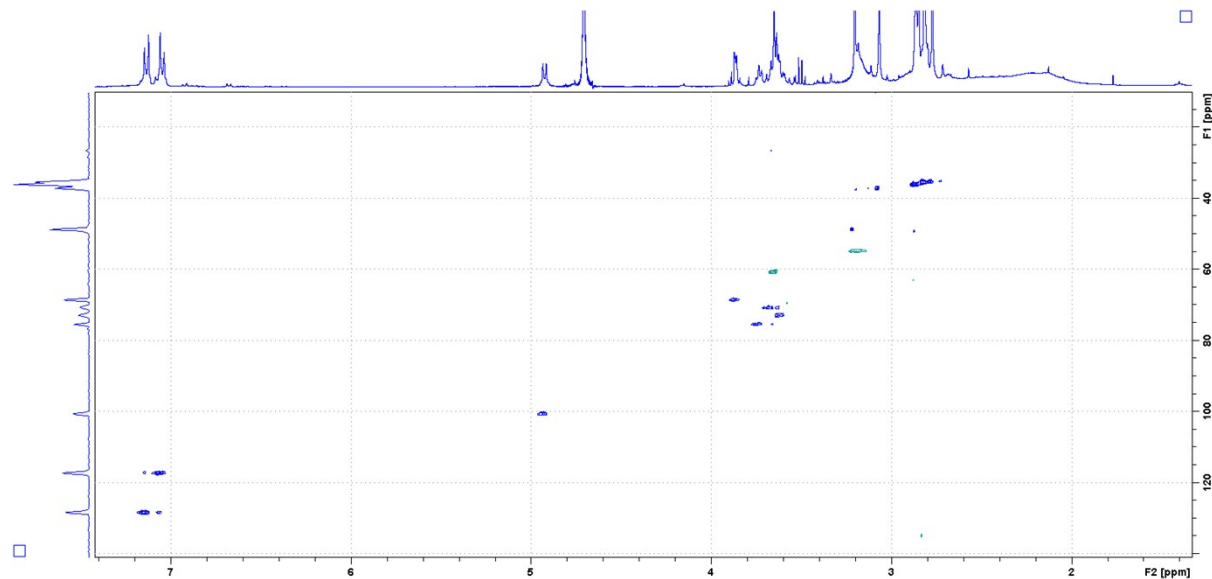

**Figure S37** HSQC NMR Spectrum of **13**,  $\text{D}_2\text{O}$  400 MHz

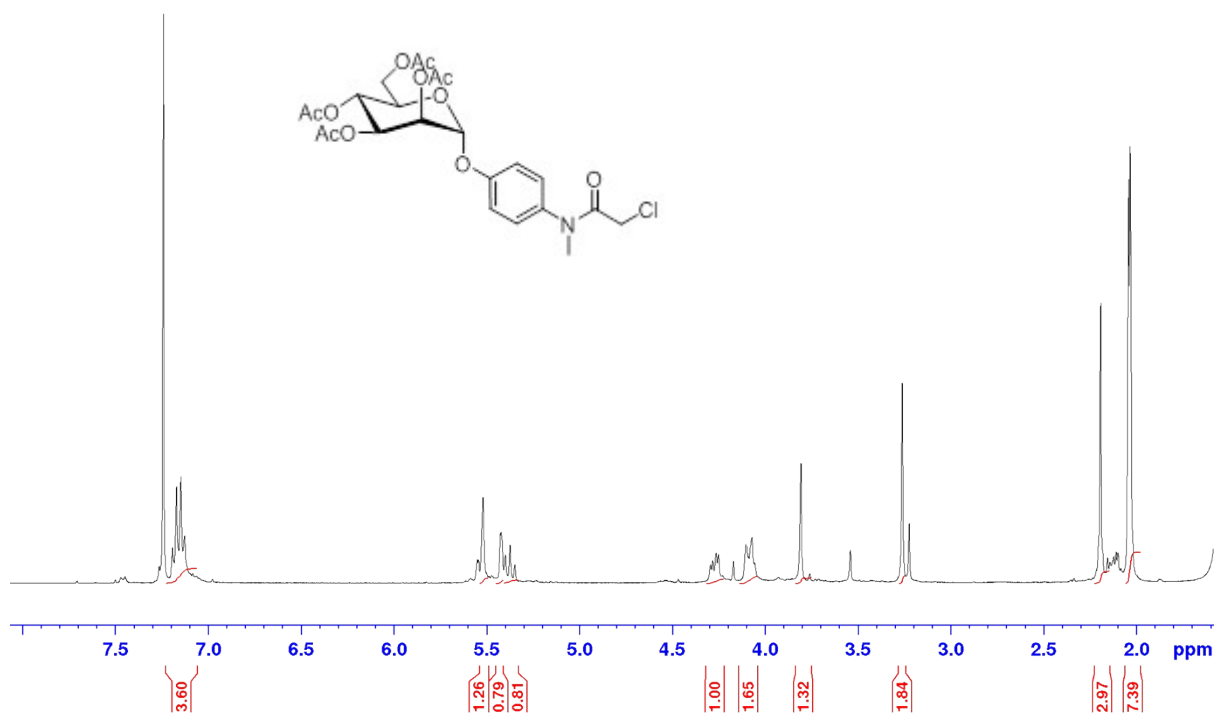

**Figure S38** <sup>1</sup>H NMR Spectrum of **17**, CDCl<sub>3</sub>, 600 MHz

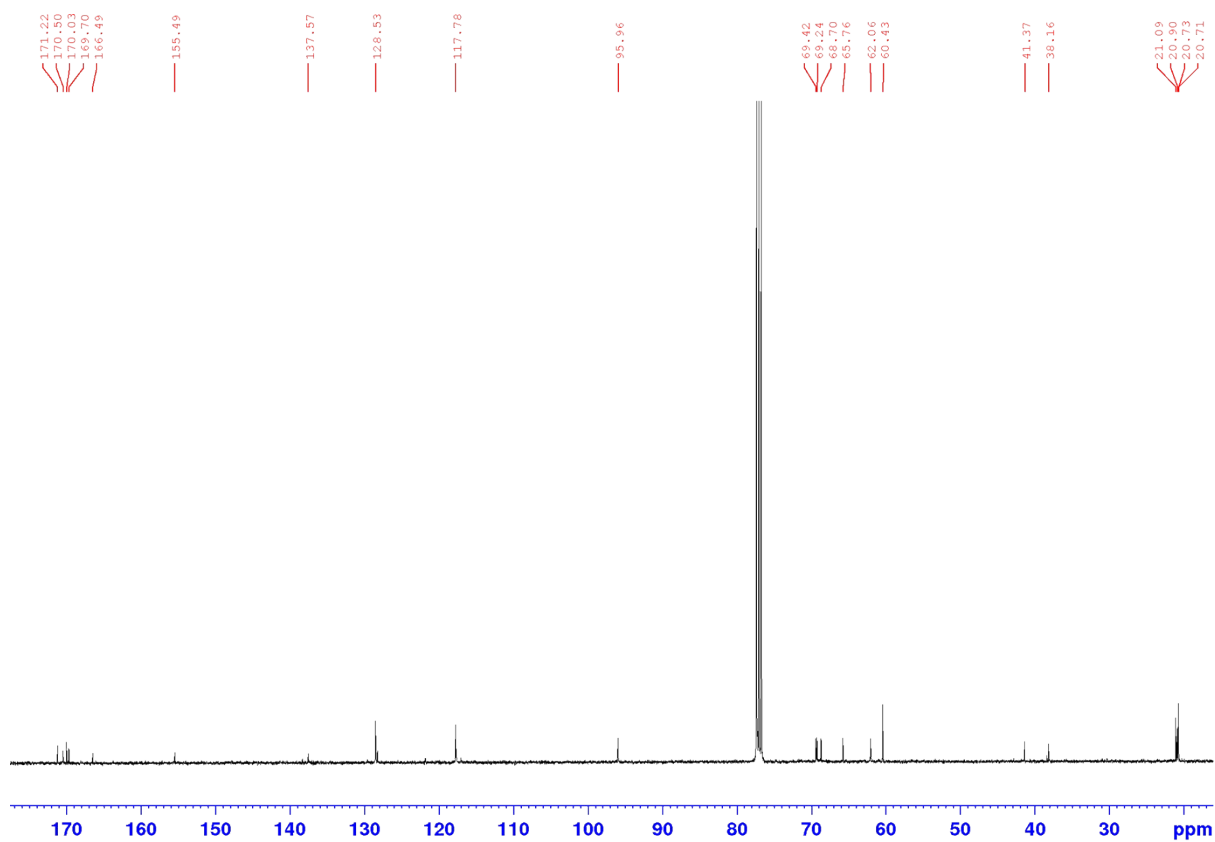

**Figure S39** <sup>13</sup>C NMR Spectrum of **17**, CDCl<sub>3</sub>, 101 MHz

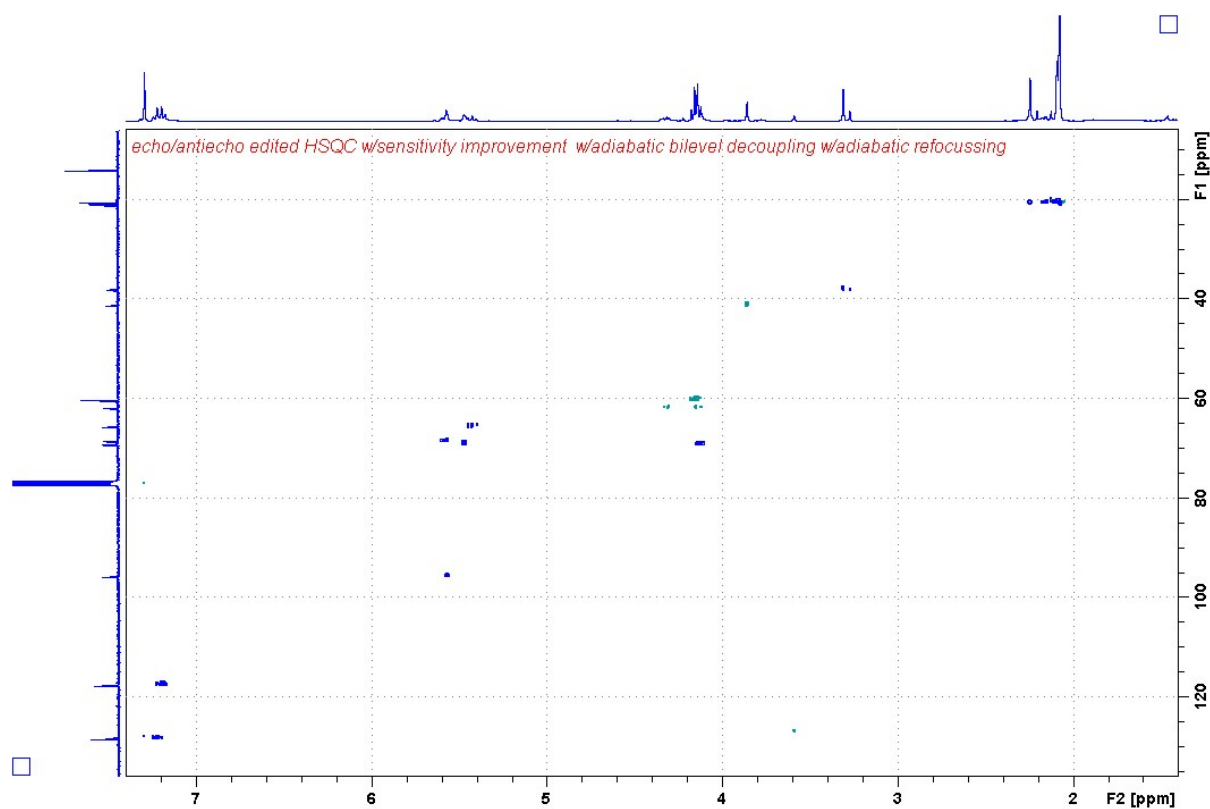

**Figure S40** HSQC NMR Spectrum of **17**,  $\text{CDCl}_3$ , 101 MHz

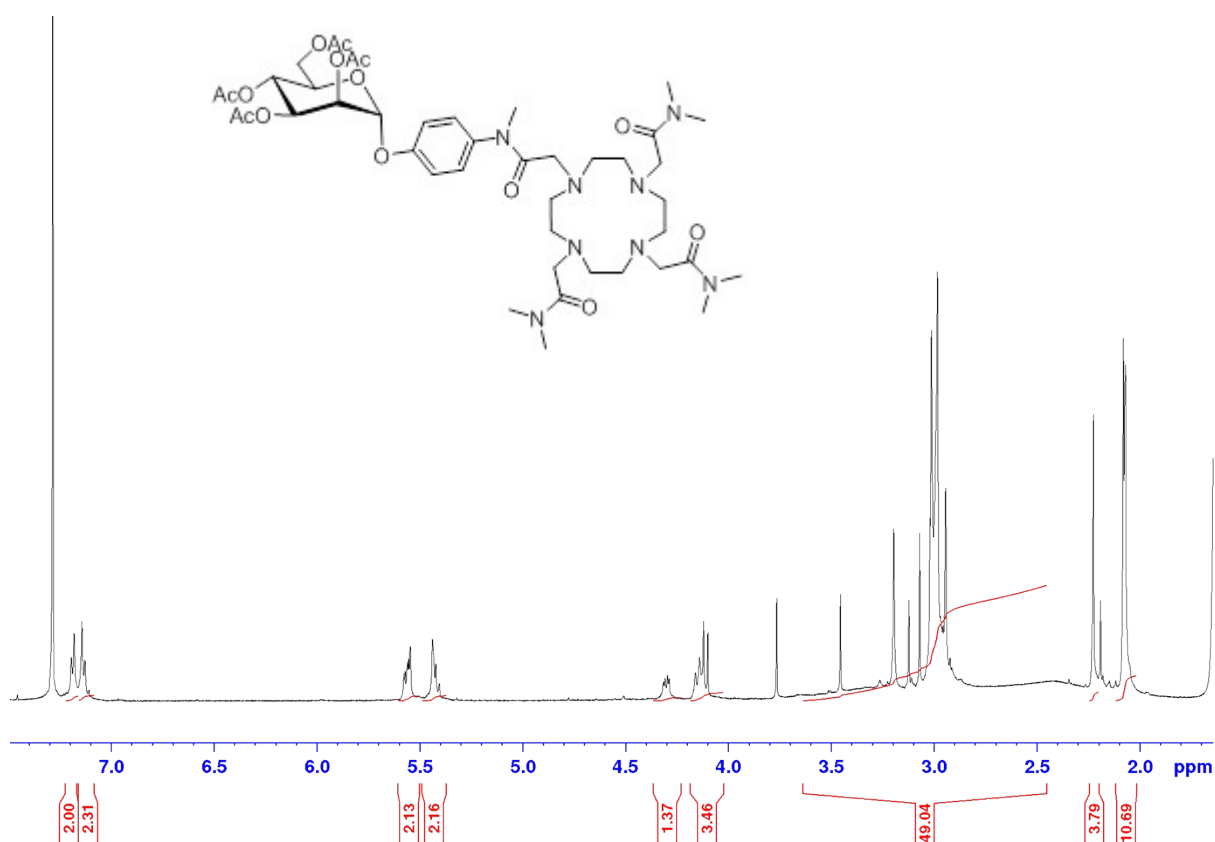

**Figure S41**  $^1\text{H}$  NMR Spectrum of **18**,  $\text{CDCl}_3$ , 600 MHz

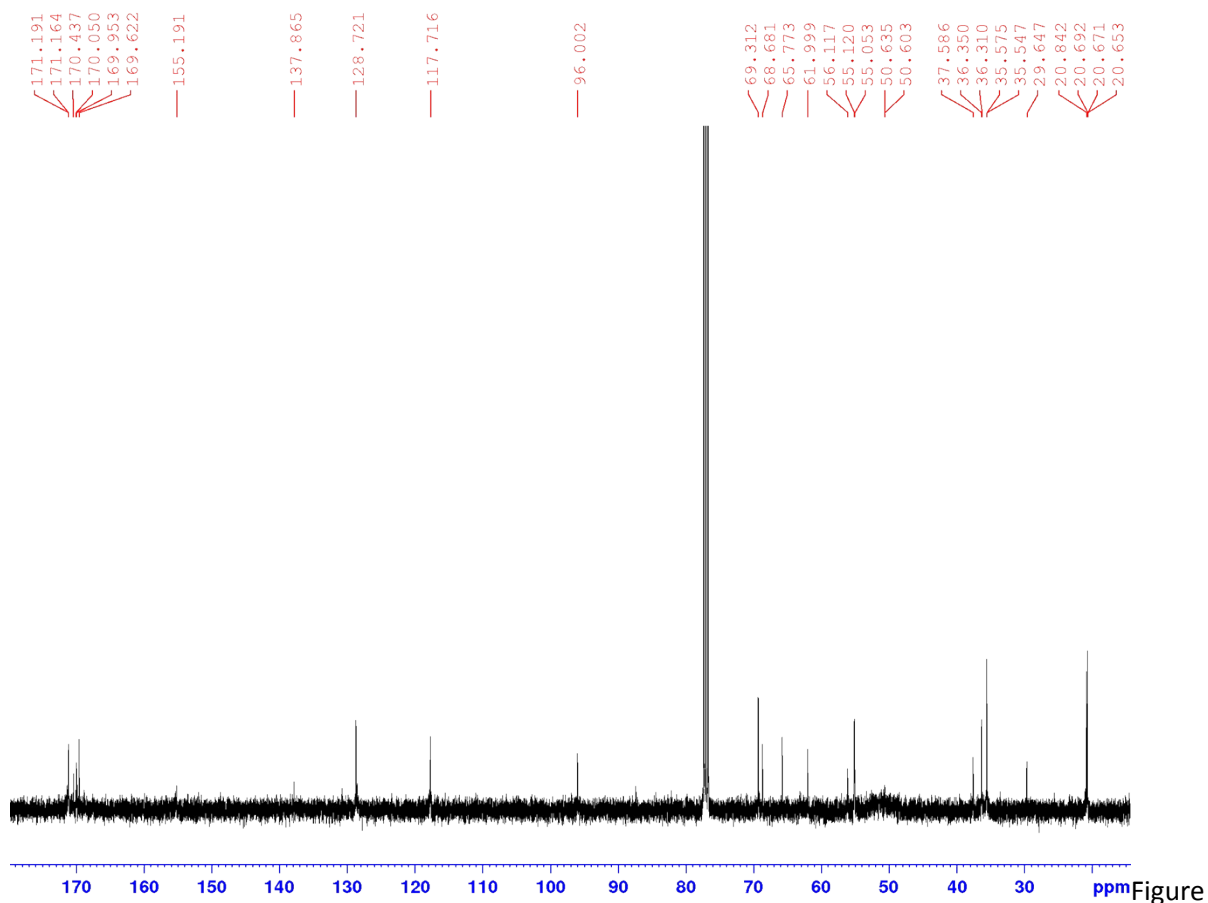

Figure S42  $^{13}\text{C}$  NMR Spectrum of **18**,  $\text{CDCl}_3$ , 101 MHz

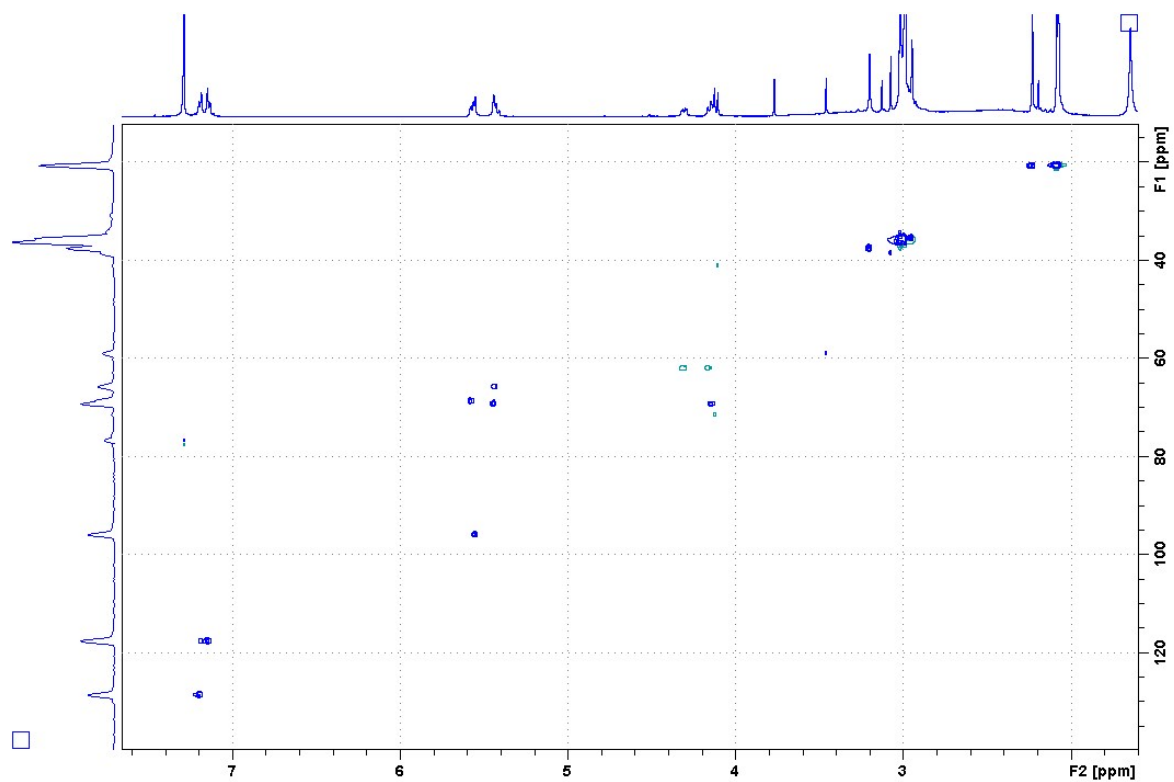

Figure S43 HSQC NMR Spectrum of **18**,  $\text{CDCl}_3$ , 101 MHz

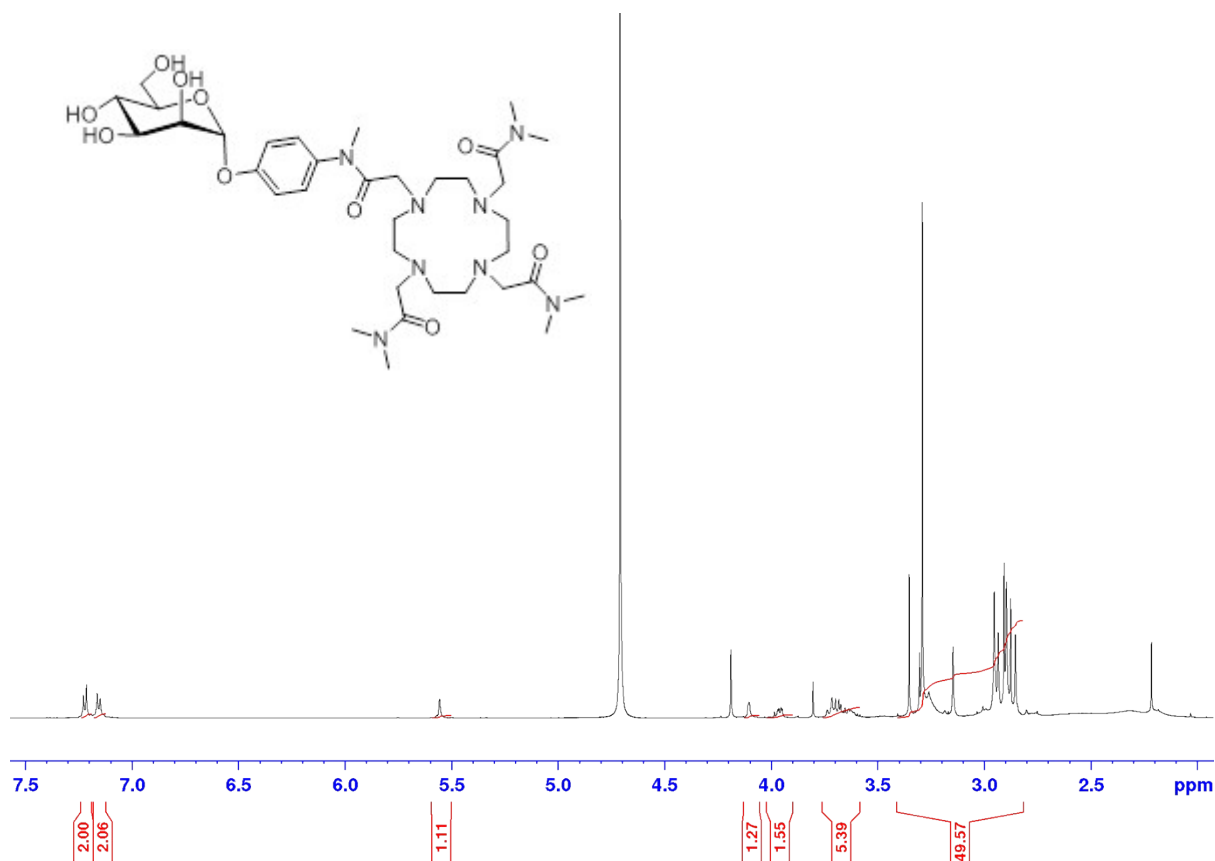

Figure S44 <sup>1</sup>H NMR Spectrum of **19**, D<sub>2</sub>O, 600 MHz

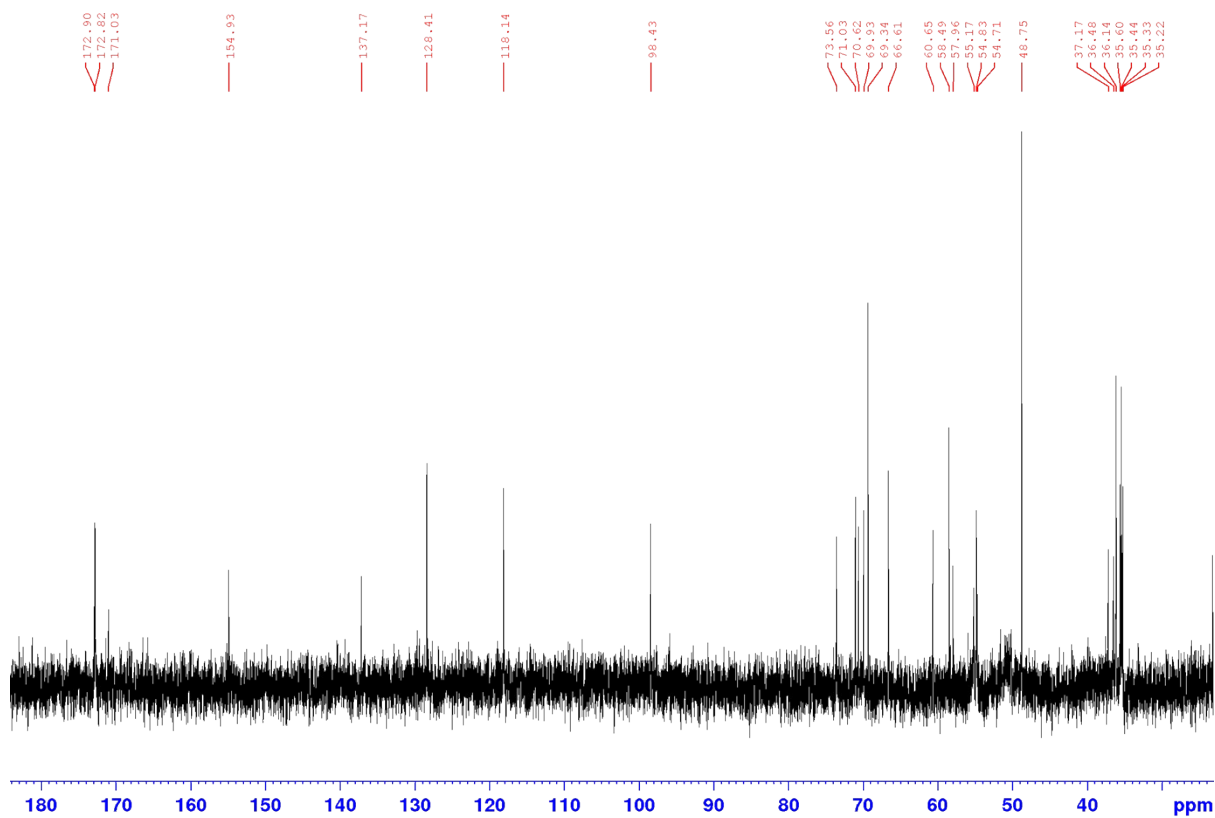

Figure S45 <sup>13</sup>C NMR Spectrum of **19**, D<sub>2</sub>O, 101 MHz

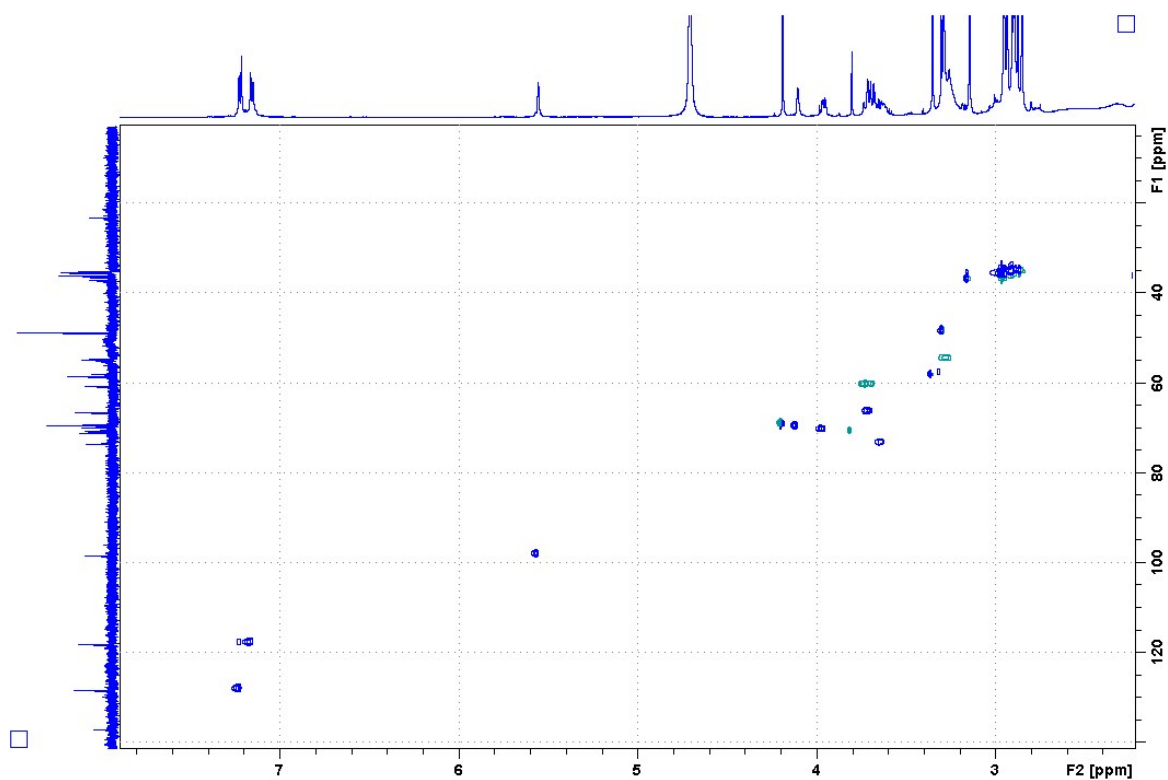

Figure S46 HSQC NMR Spectrum of **19**, CDCl<sub>3</sub>, 101 MHz

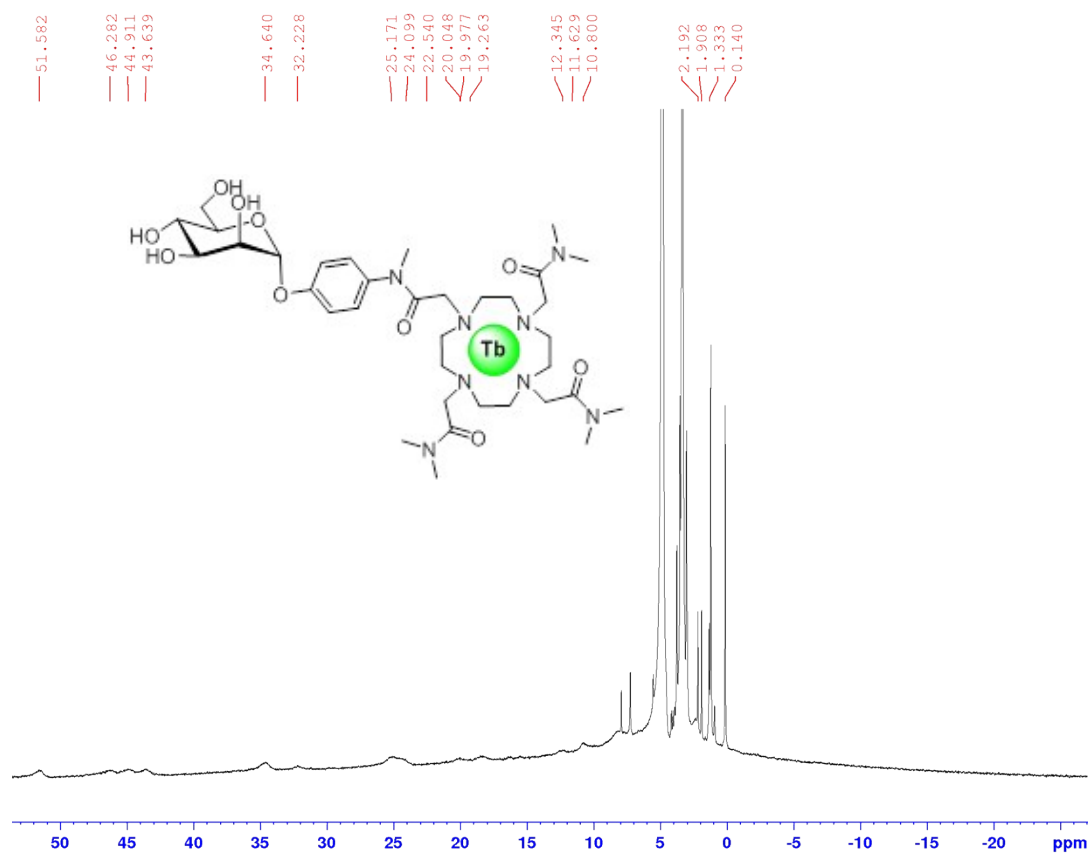

Figure S47 <sup>1</sup>H NMR Spectrum of **3Tb**, D<sub>2</sub>O, 600 MHz

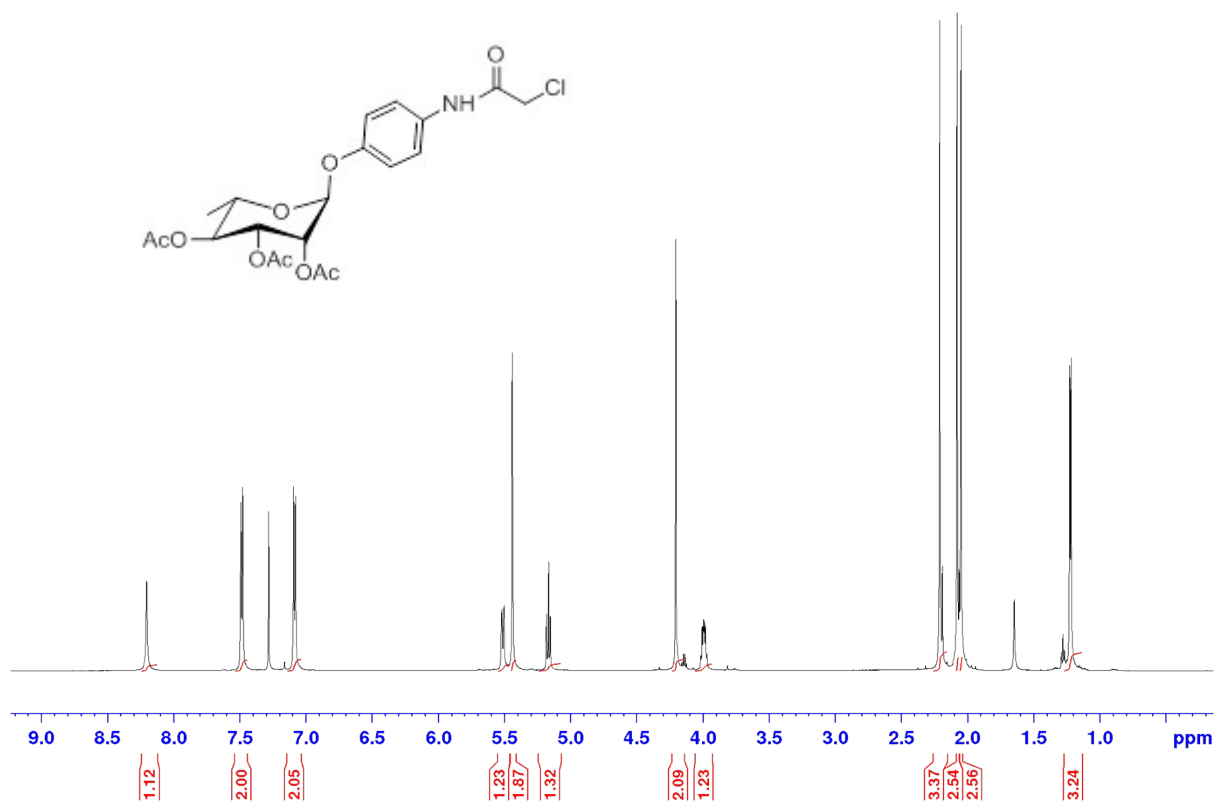

Figure S48 <sup>1</sup>H NMR Spectrum of **22**, CDCl<sub>3</sub>, 600 MHz

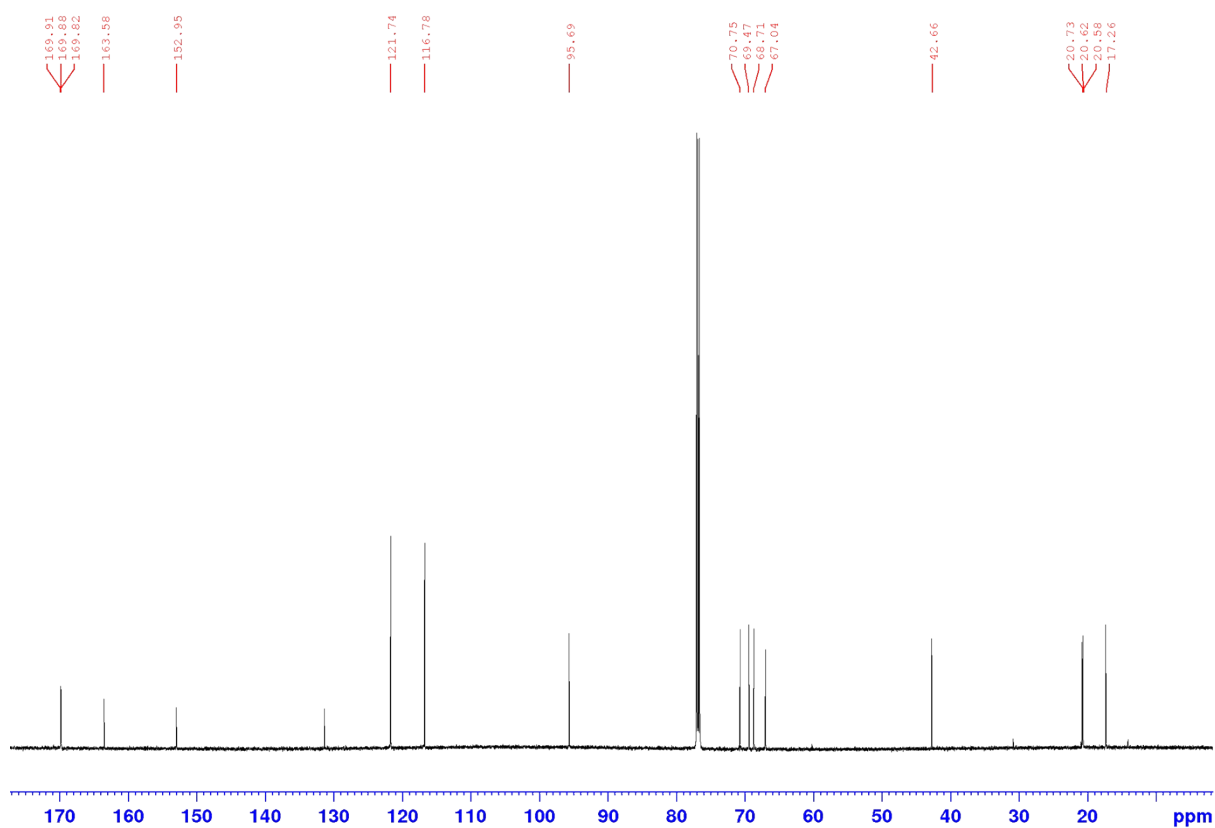

Figure S49 <sup>13</sup>C NMR Spectrum of **22**, CDCl<sub>3</sub>, 101 MHz

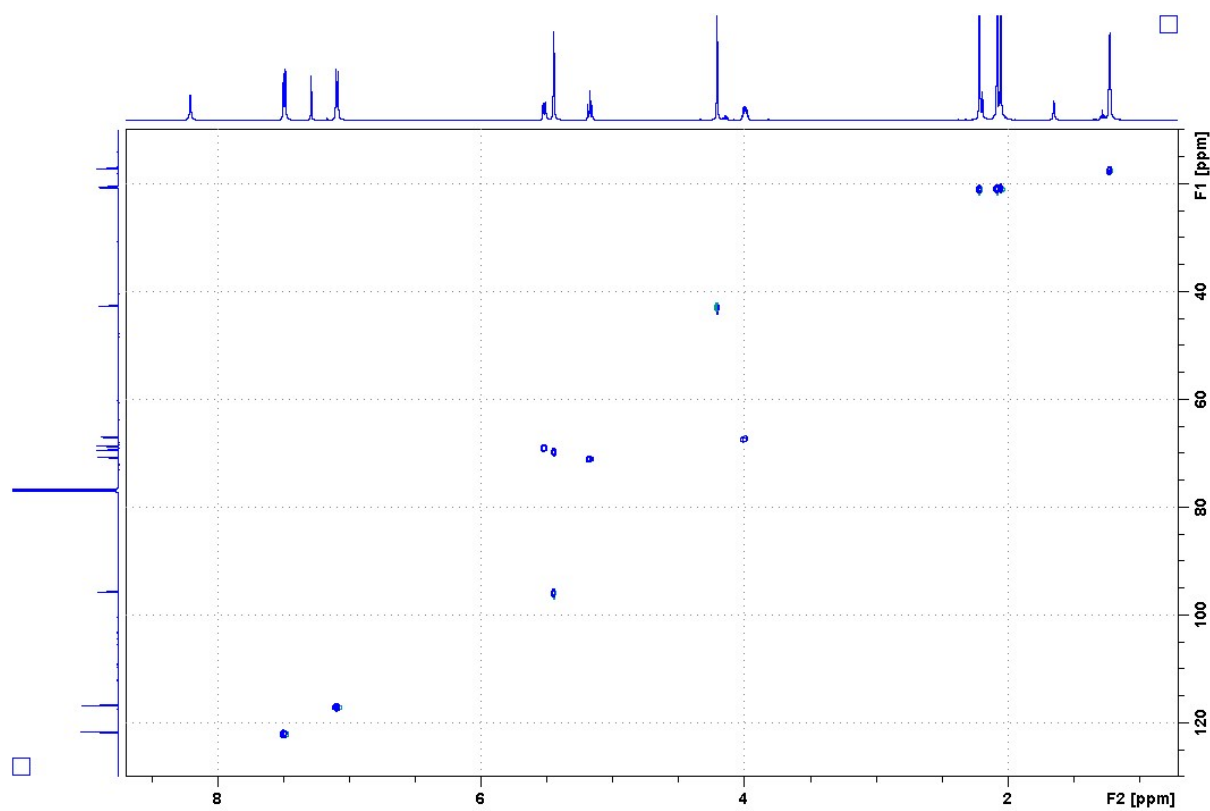

Figure S50 HSQC NMR Spectrum of **22**, CDCl<sub>3</sub>, 101 MHz

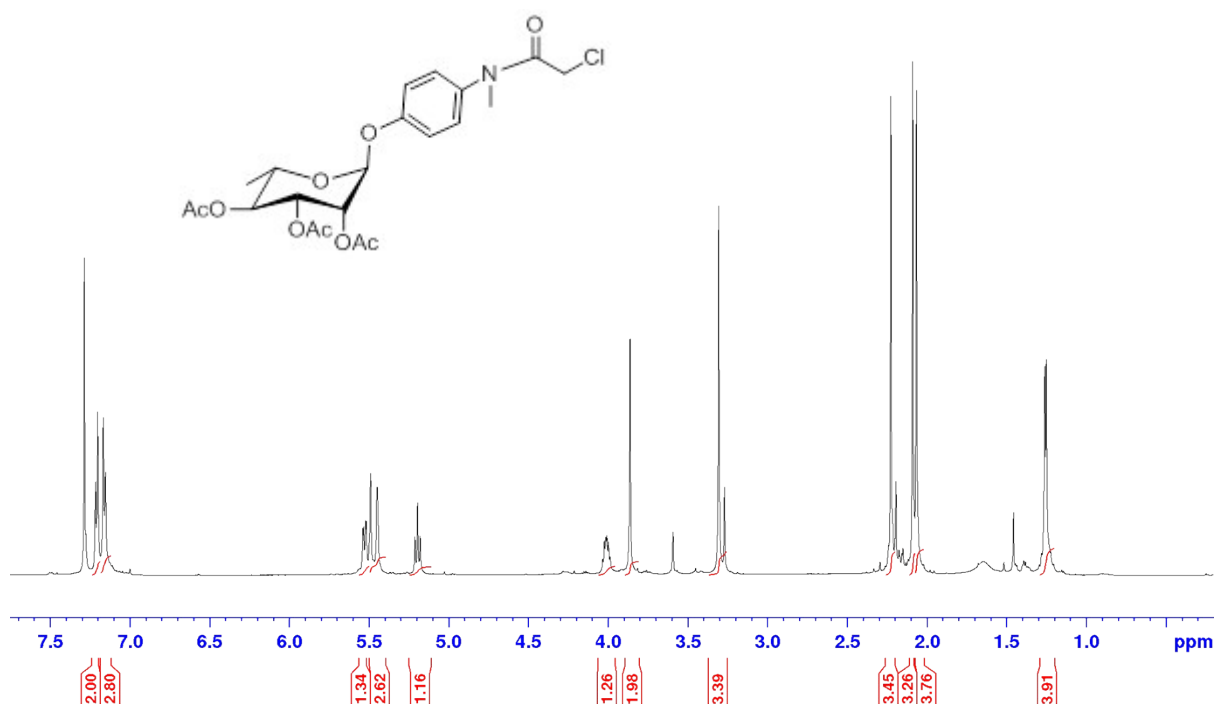

Figure S51 <sup>1</sup>H NMR Spectrum of **23**, CDCl<sub>3</sub>, 600 MHz

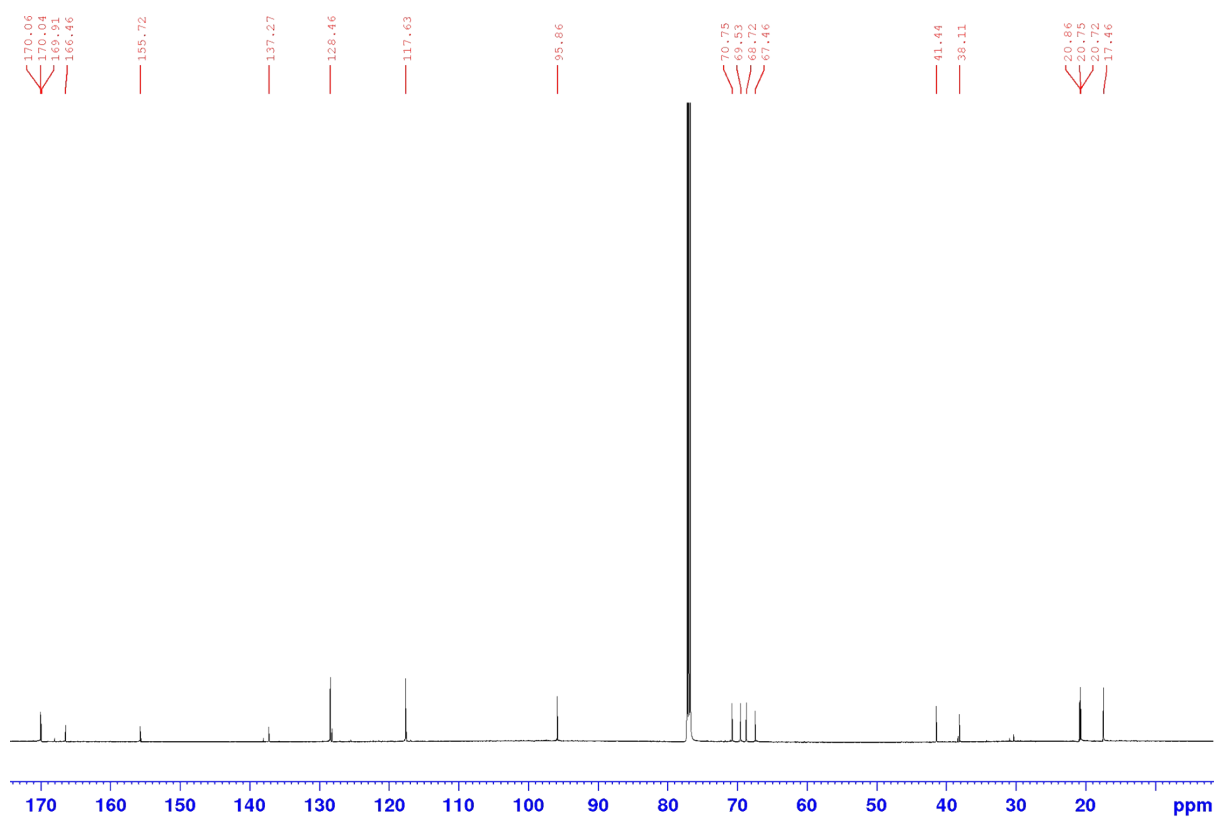

**Figure S52** <sup>13</sup>C NMR Spectrum of **23**, CDCl<sub>3</sub>, 101 MHz

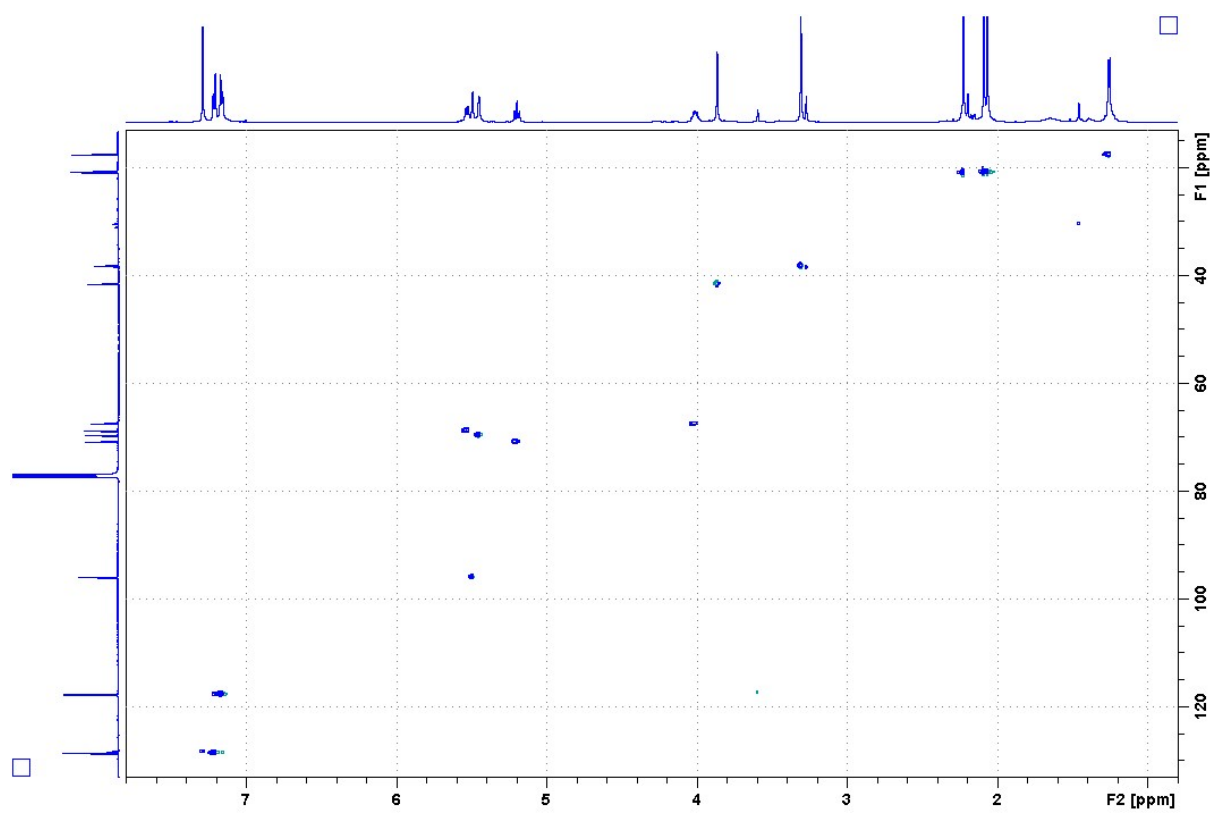

**Figure S53** HSQC NMR Spectrum of **23**, CDCl<sub>3</sub>, 101 MHz

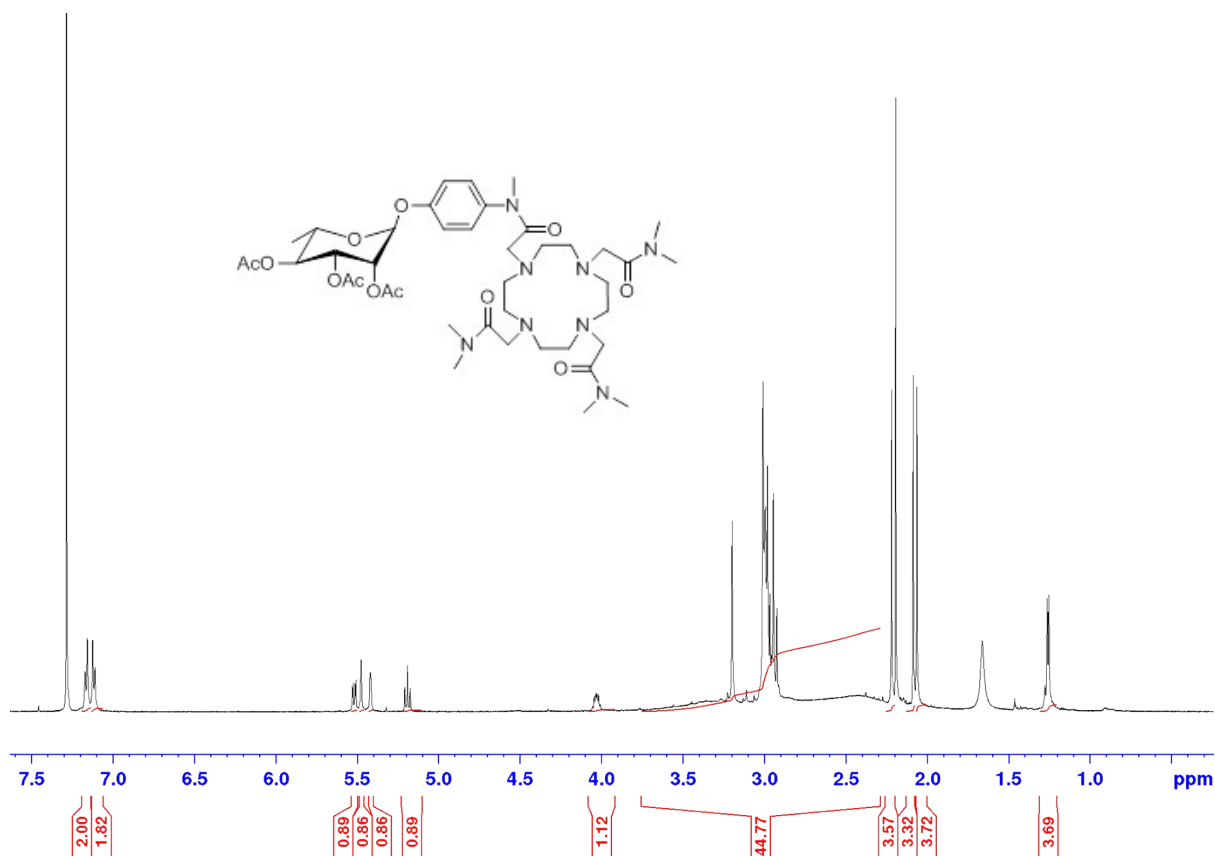

Figure S54 <sup>1</sup>H NMR Spectrum of **24**, CDCl<sub>3</sub>, 600 MHz

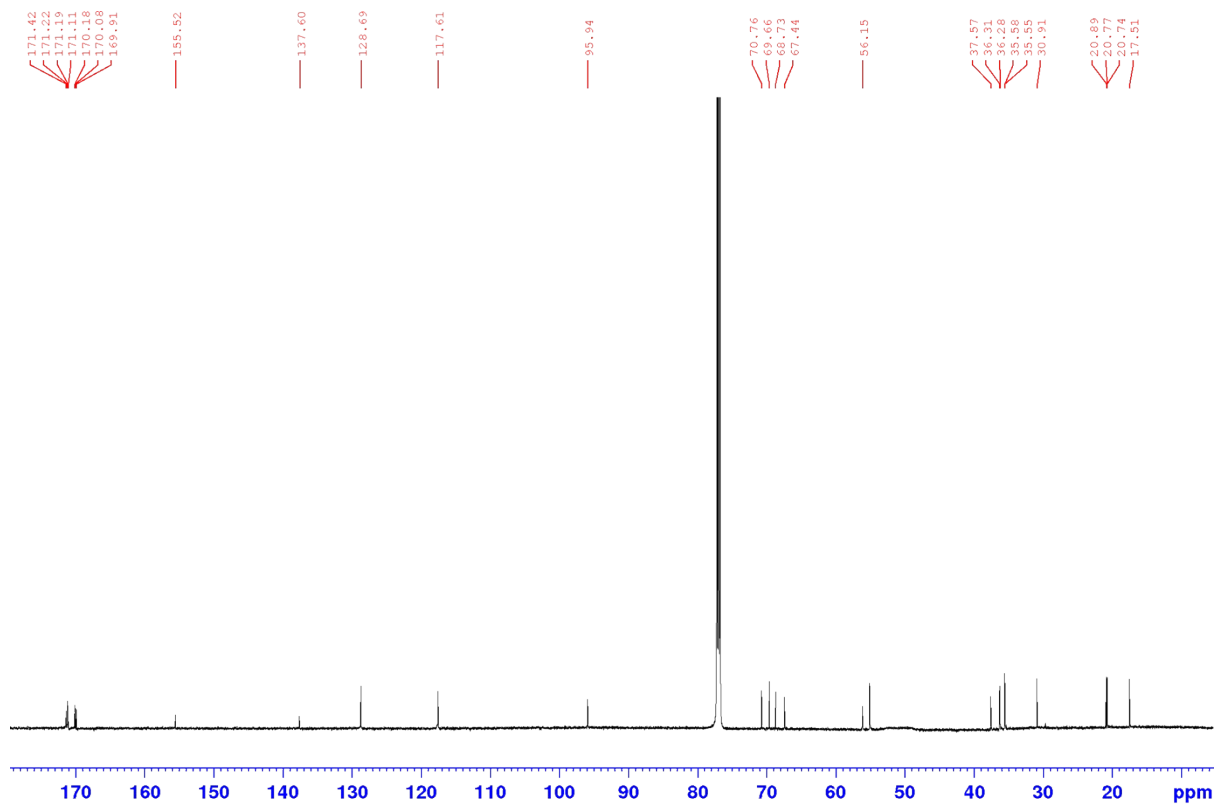

Figure S55 <sup>13</sup>C NMR Spectrum of **24**, CDCl<sub>3</sub>, 101 MHz

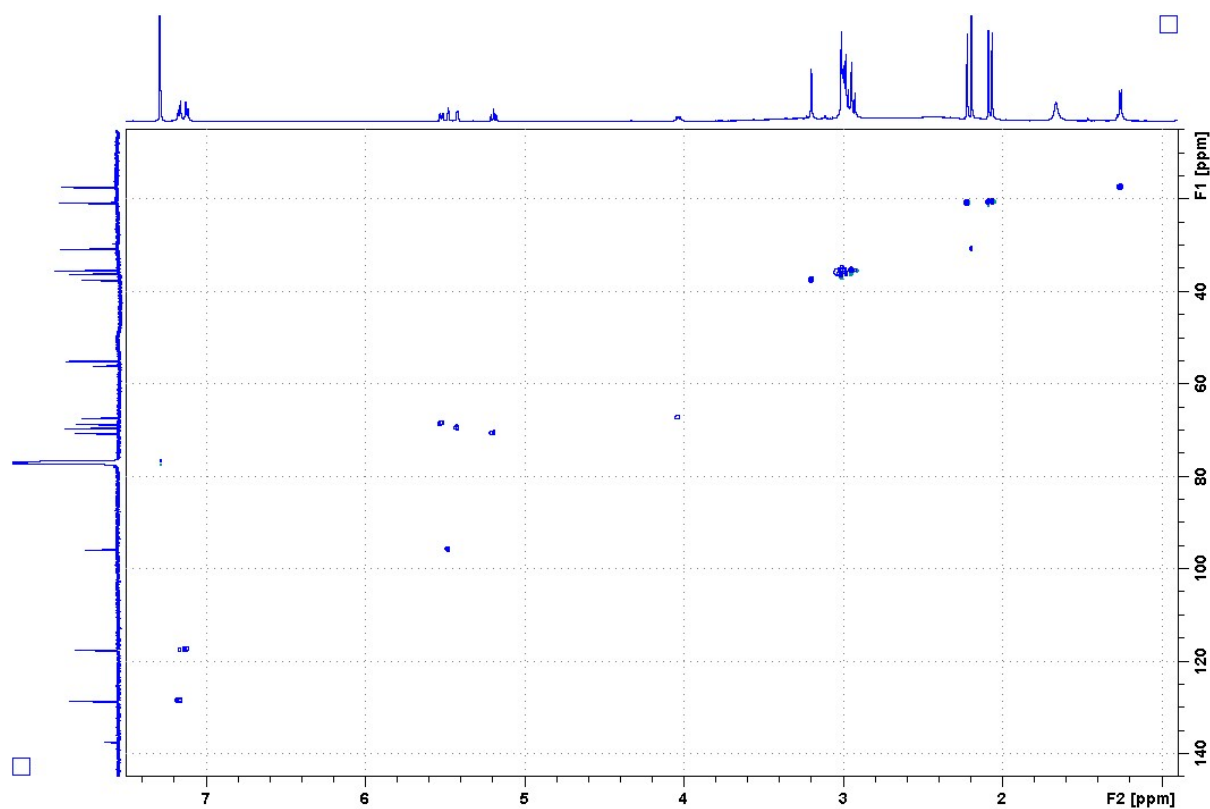

Figure S56 HSQC NMR Spectrum of **24**, CDCl<sub>3</sub>, 101 MHz

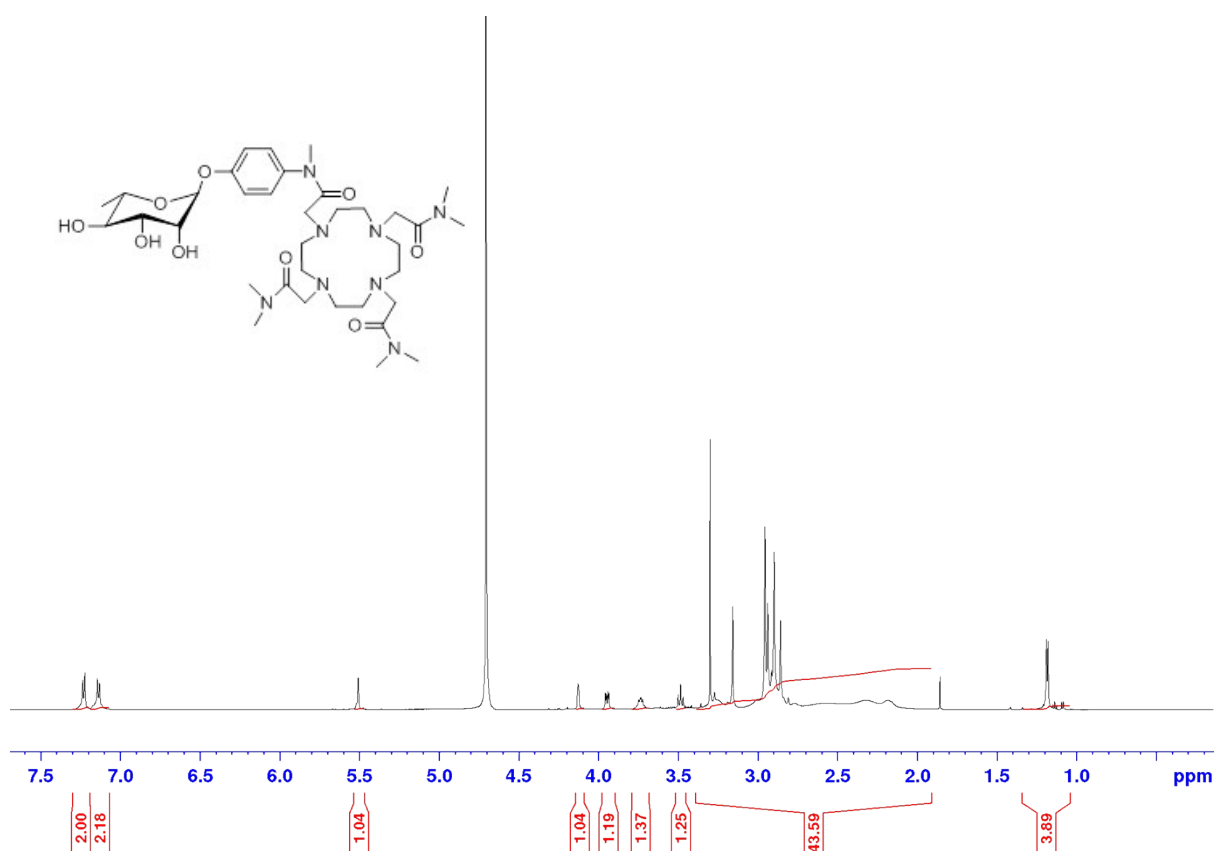

Figure S57 <sup>1</sup>H NMR Spectrum of **25**, D<sub>2</sub>O, 600 MHz

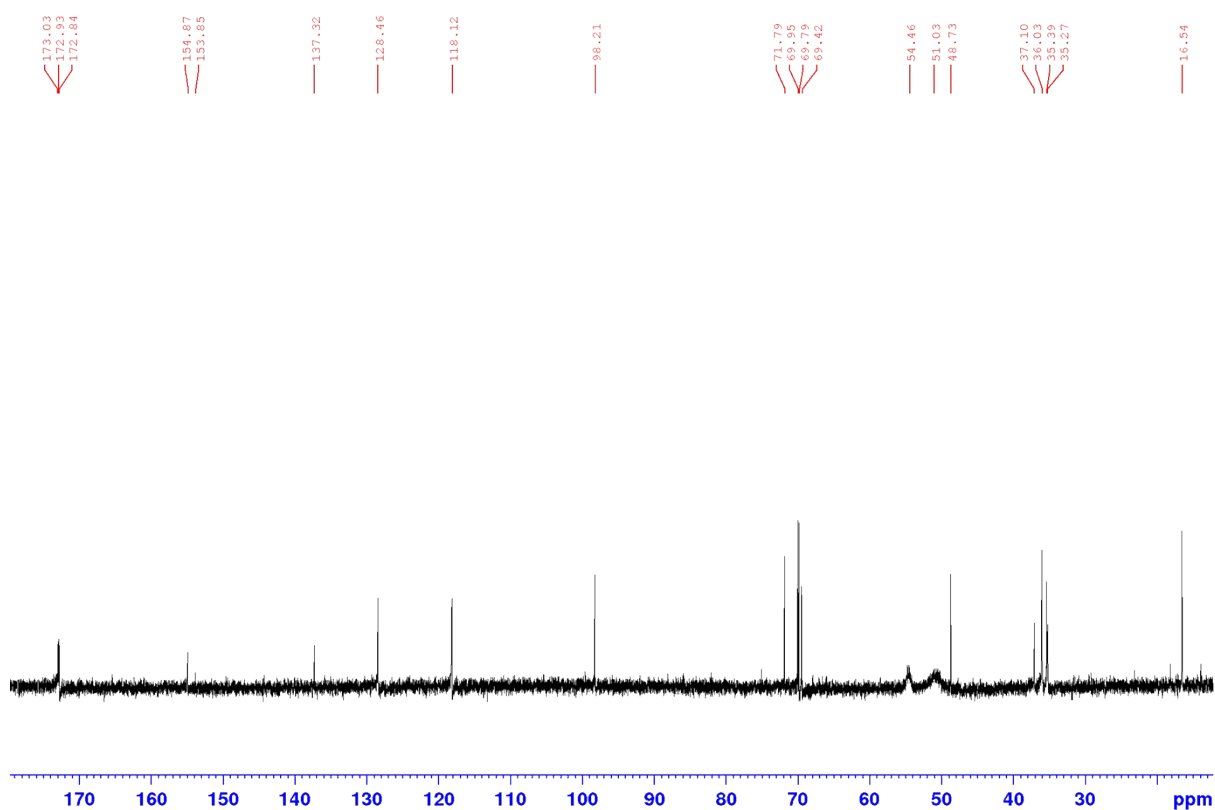

**Figure S58**  $^{13}\text{C}$  NMR Spectrum of **25**,  $\text{D}_2\text{O}$ , 101 MHz

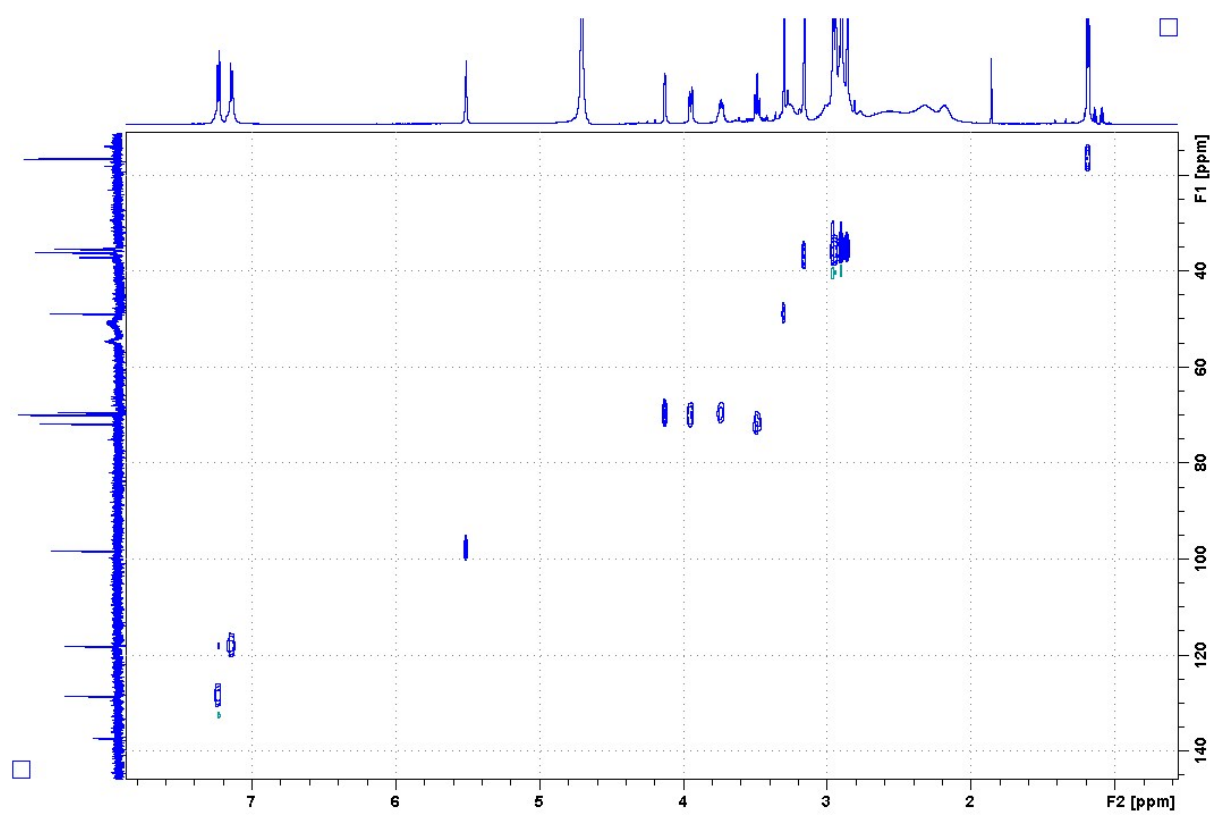

**Figure S59** HSQC NMR Spectrum of **25**,  $\text{D}_2\text{O}$ , 101 MHz

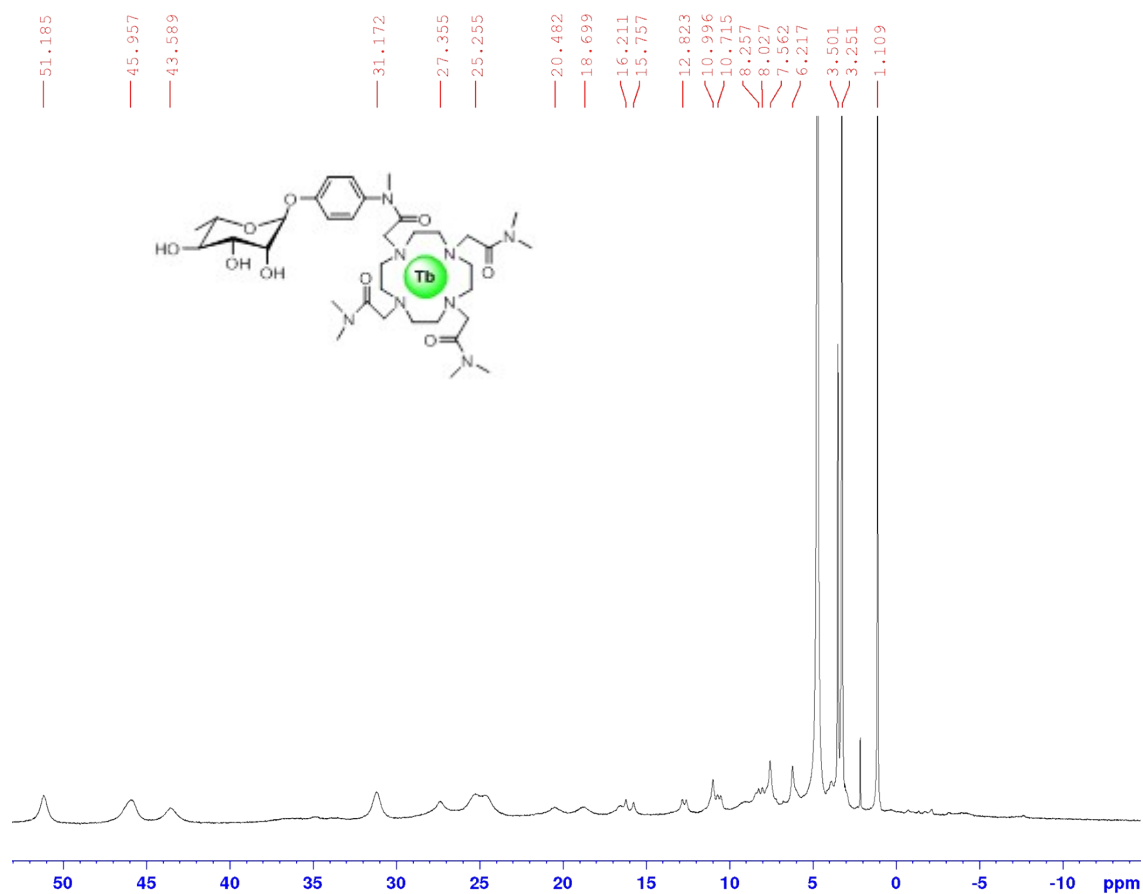

**Figure S60**  $^1\text{H}$  NMR Spectrum of **4Tb**,  $\text{D}_2\text{O}$ , 400 MHz

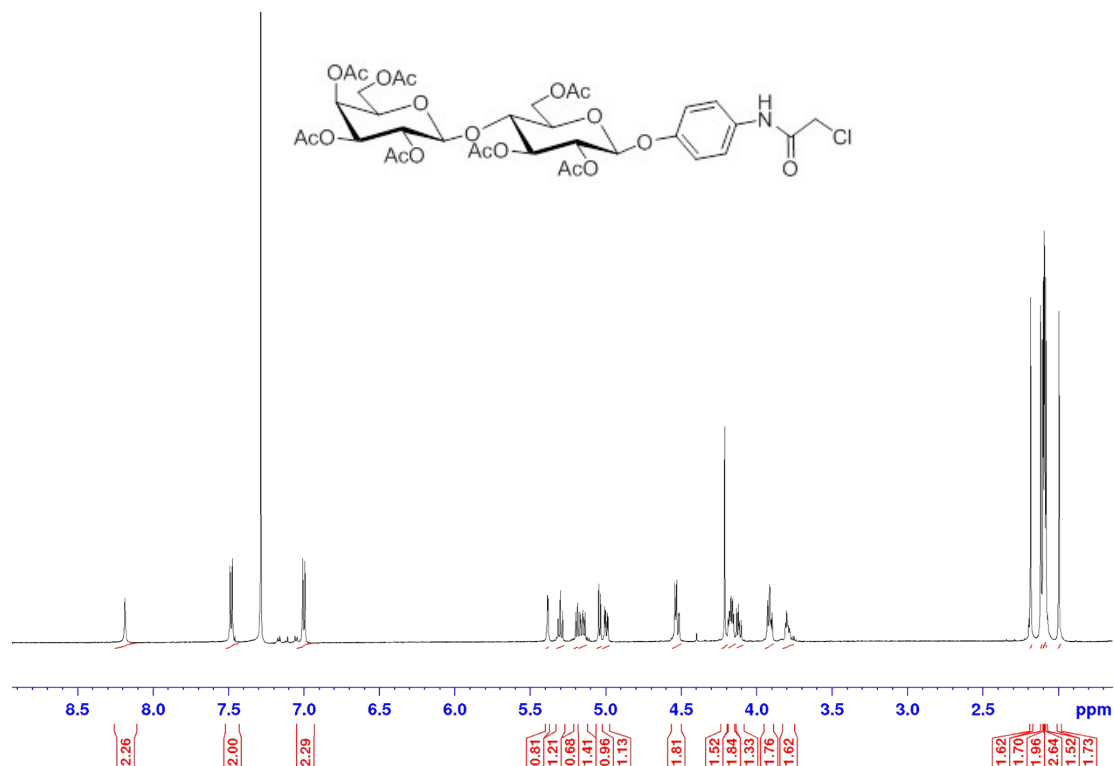

**Figure S61**  $^1\text{H}$  NMR Spectrum of **29**,  $\text{CDCl}_3$ , 600 MHz

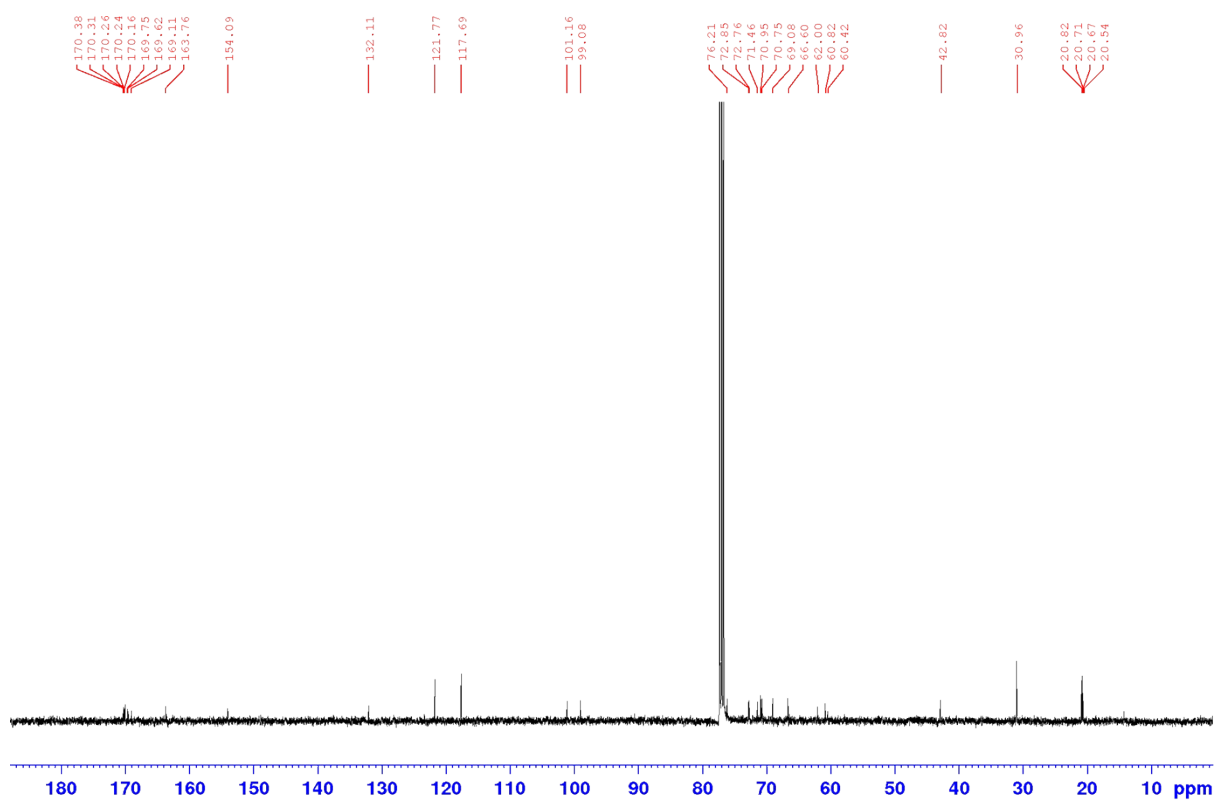

Figure S62  $^{13}\text{C}$  NMR Spectrum of **29**,  $\text{CDCl}_3$ , 101 MHz

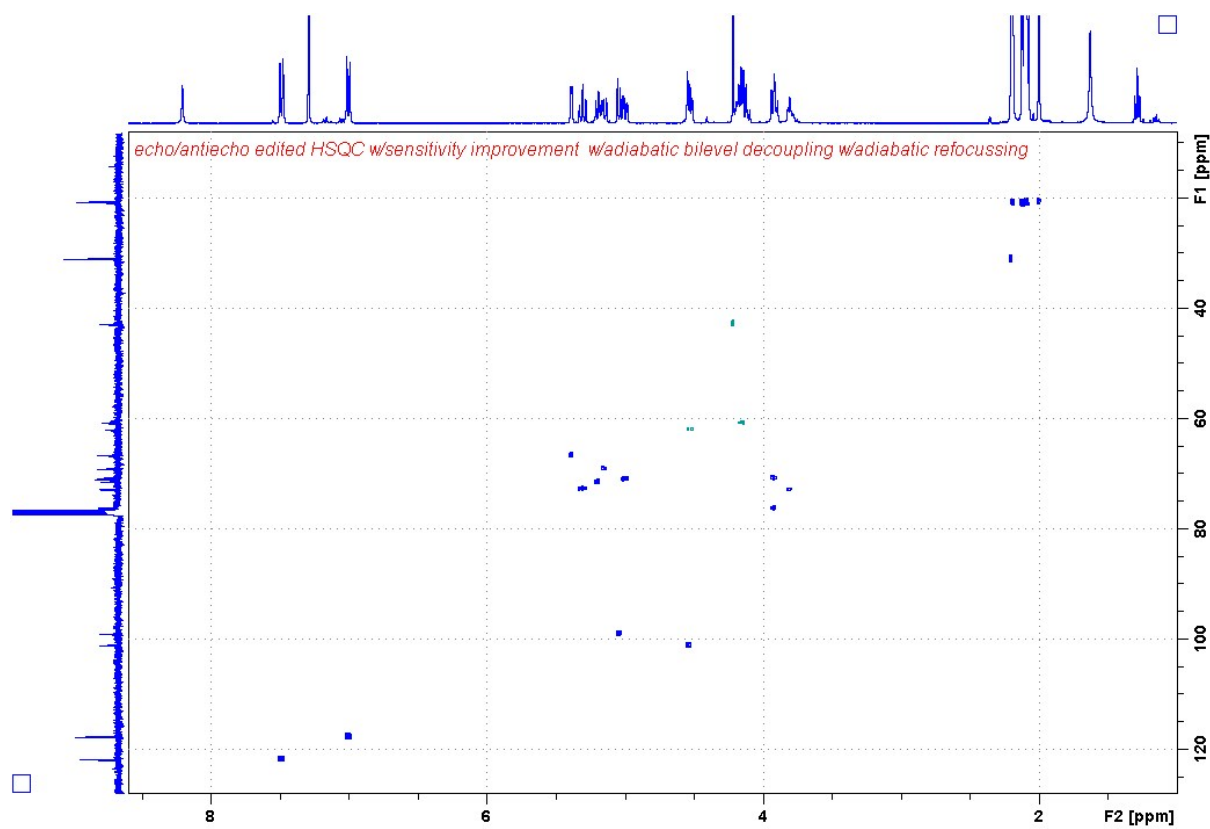

Figure S63 HSQC NMR Spectrum of **29**,  $\text{CDCl}_3$ , 101 MHz

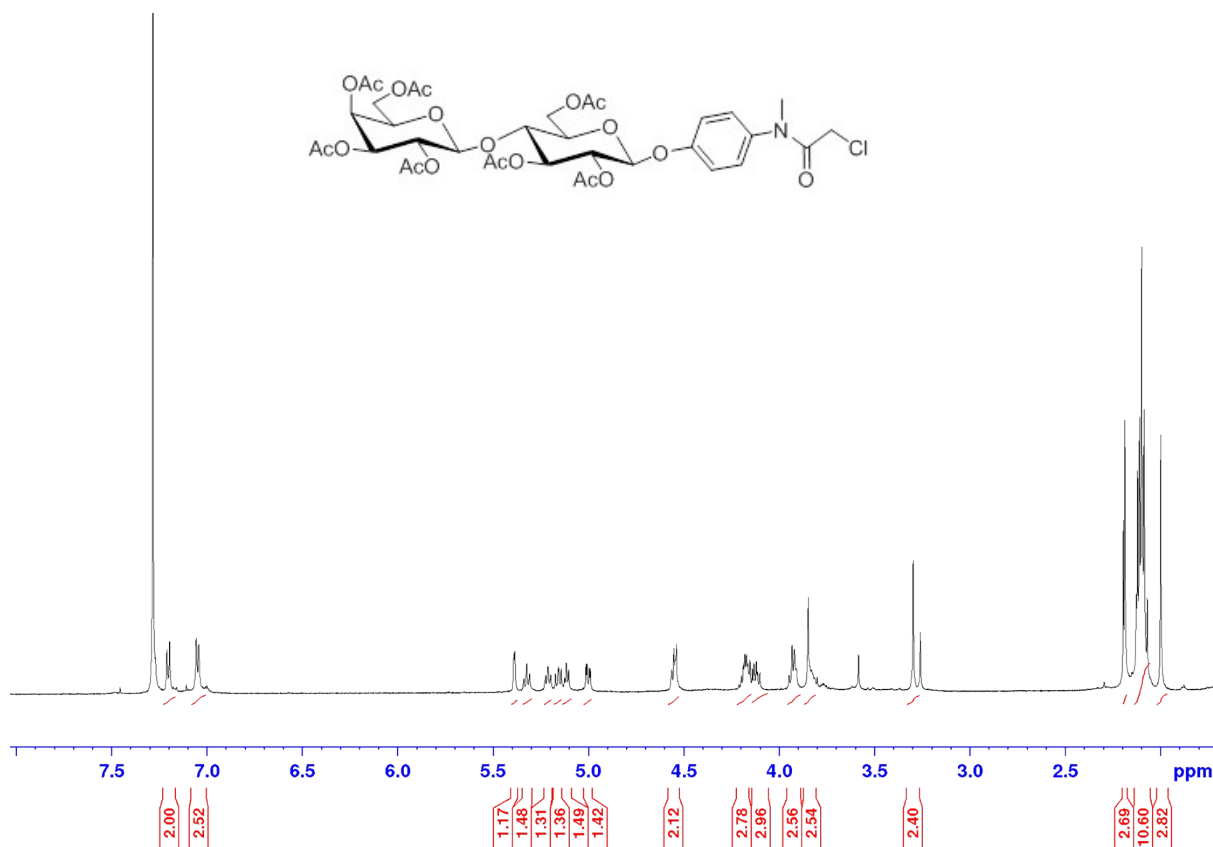

Figure S64 <sup>1</sup>H NMR Spectrum of **30**, CDCl<sub>3</sub>, 600 MHz

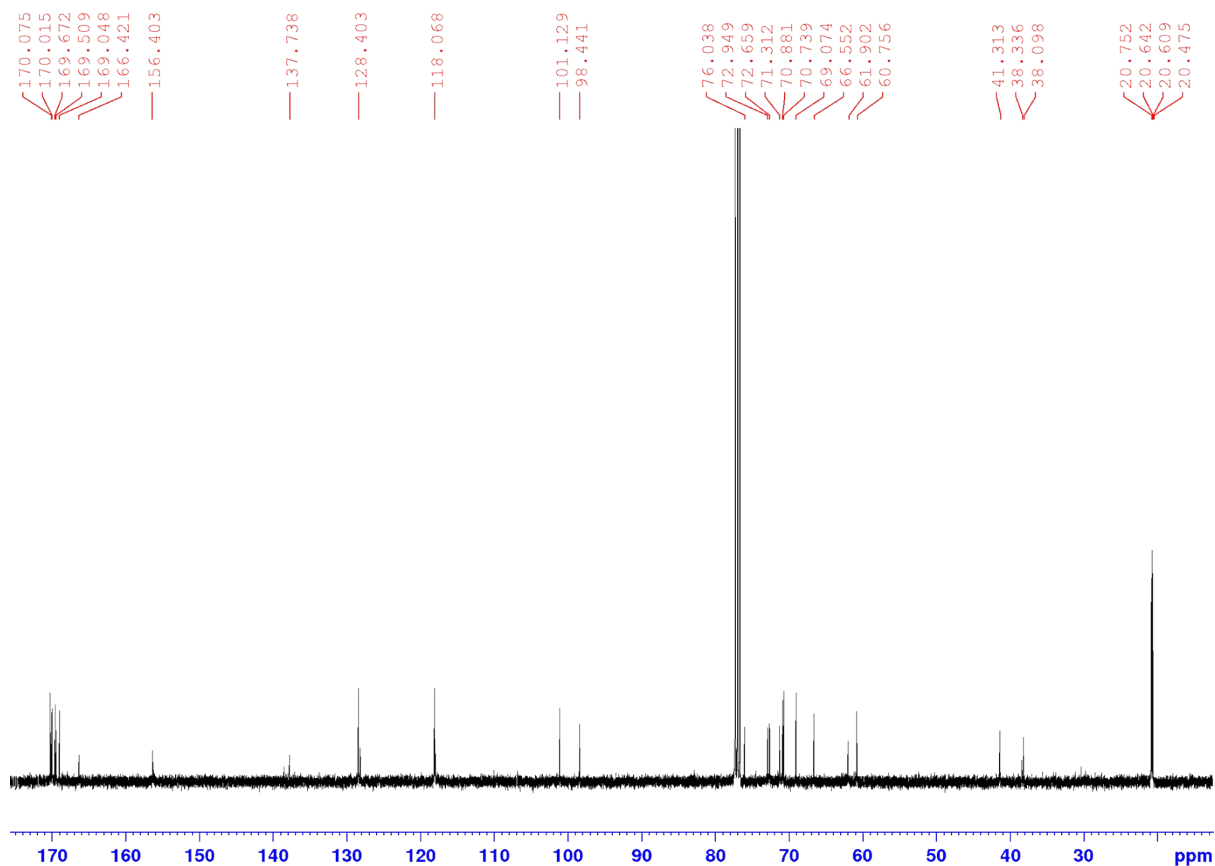

Figure S65 <sup>13</sup>C NMR Spectrum of **30**, CDCl<sub>3</sub>, 101 MHz

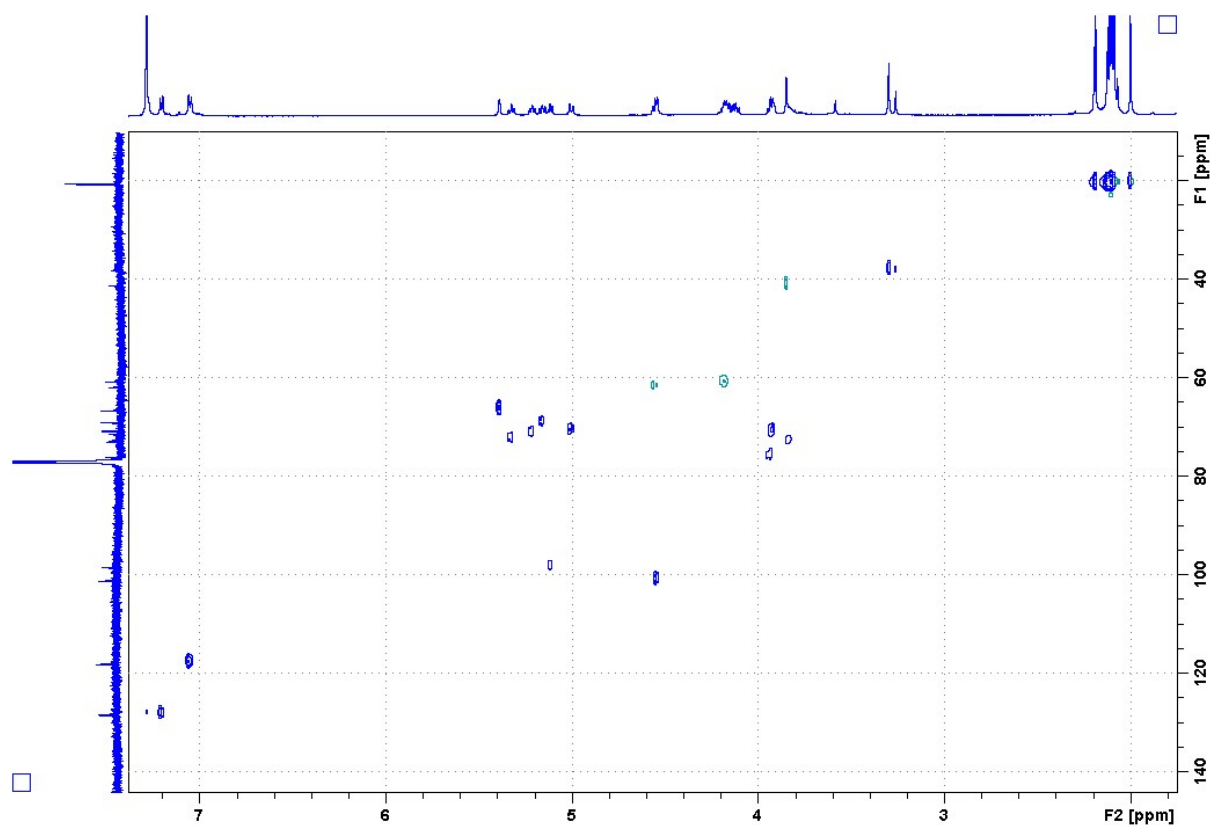

Figure S66 HSQC NMR Spectrum of **30**, CDCl<sub>3</sub>, 101 MHz

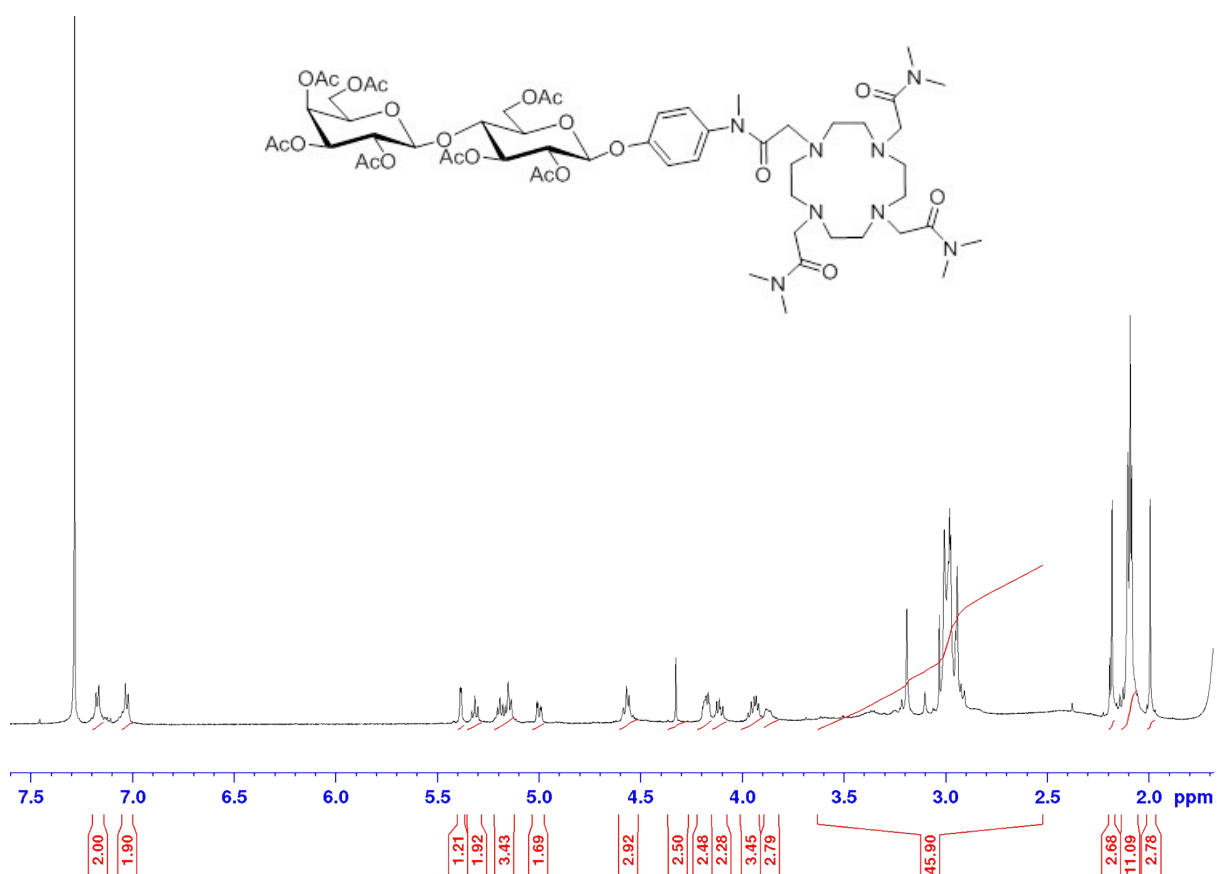

Figure S67 <sup>1</sup>H NMR Spectrum of **31**, CDCl<sub>3</sub>, 600 MHz

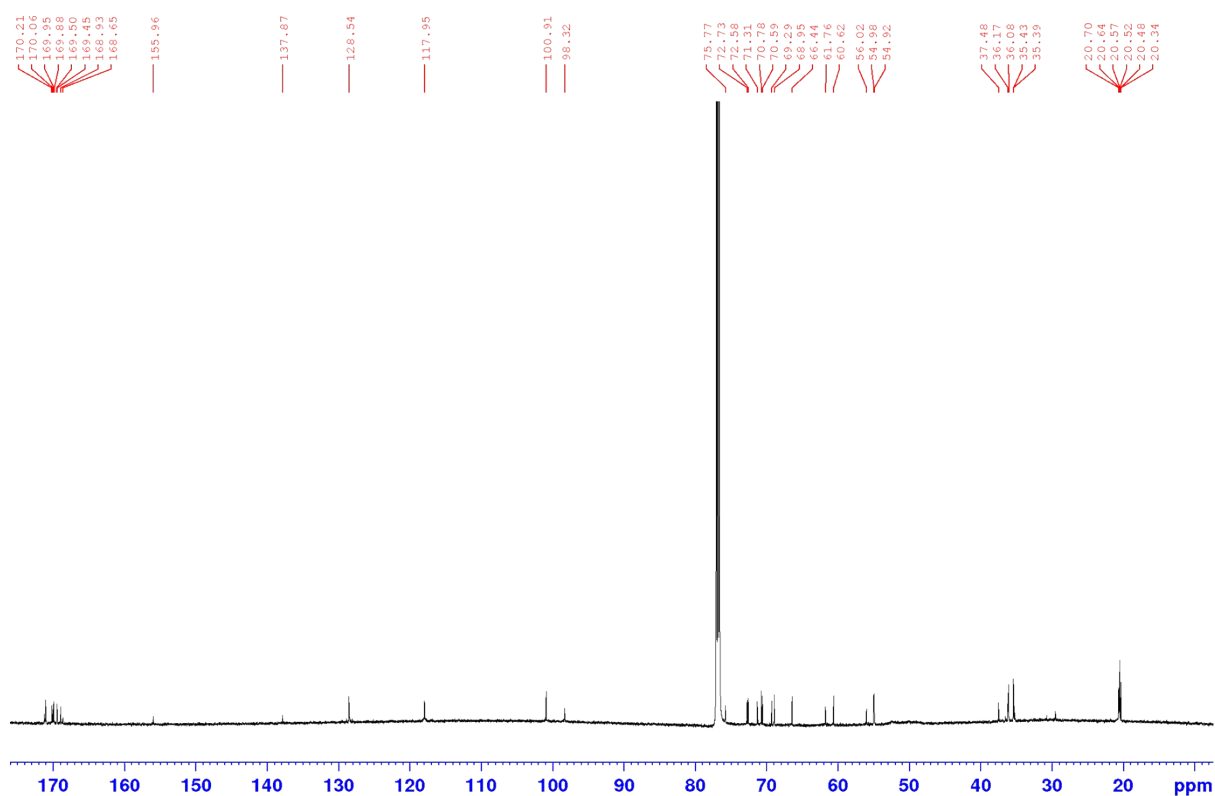

Figure S68  $^{13}\text{C}$  NMR Spectrum of **31**,  $\text{CDCl}_3$ , 101 MHz

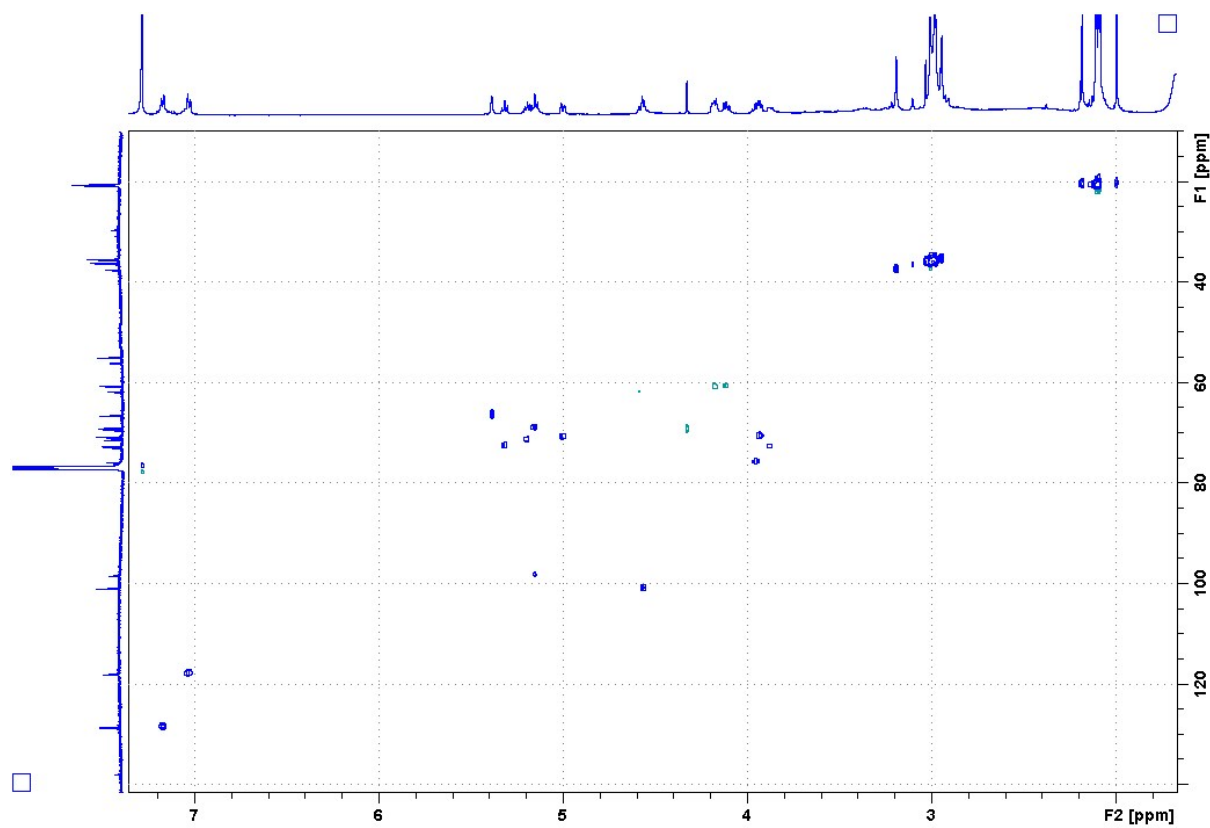

Figure S69 HSQC NMR Spectrum of **31**,  $\text{CDCl}_3$ , 101 MHz

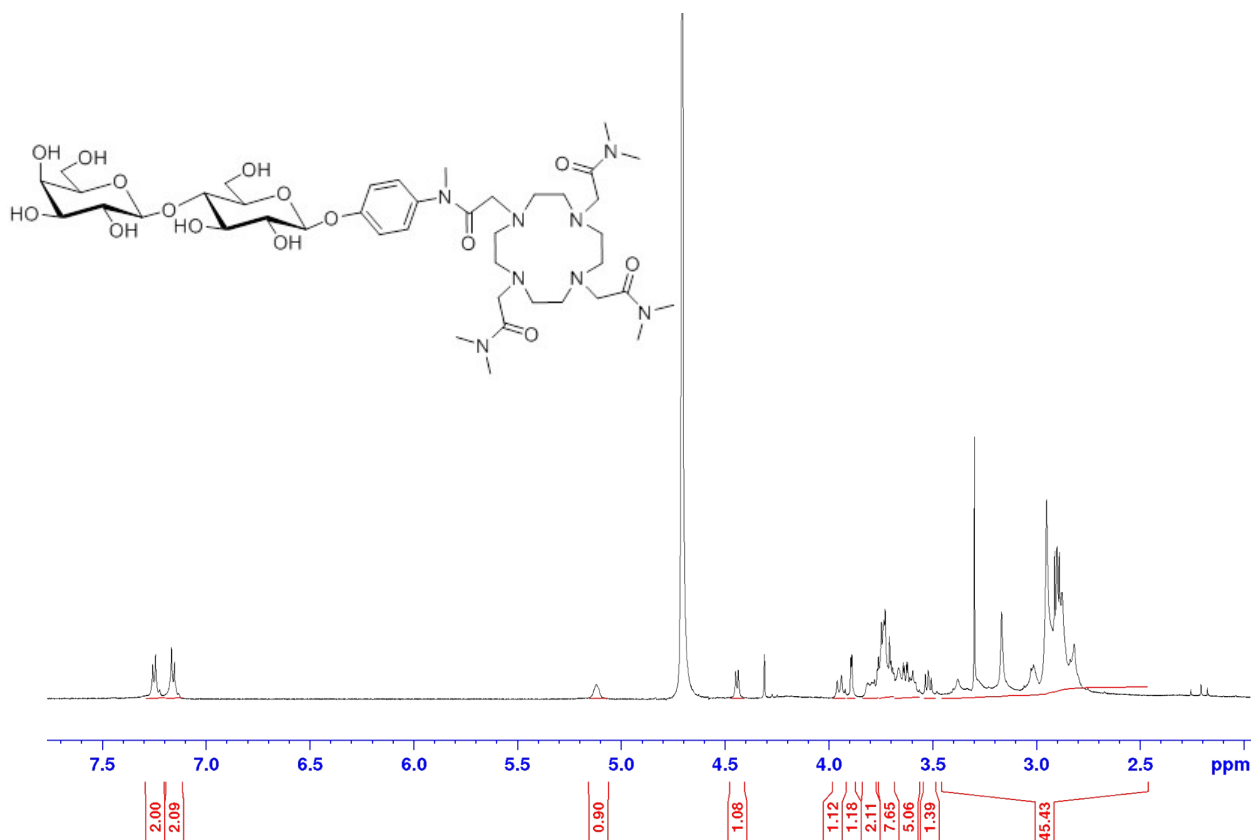

Figure S70  $^1\text{H}$  NMR Spectrum of **32**,  $\text{CDCl}_3$ , 600 MHz

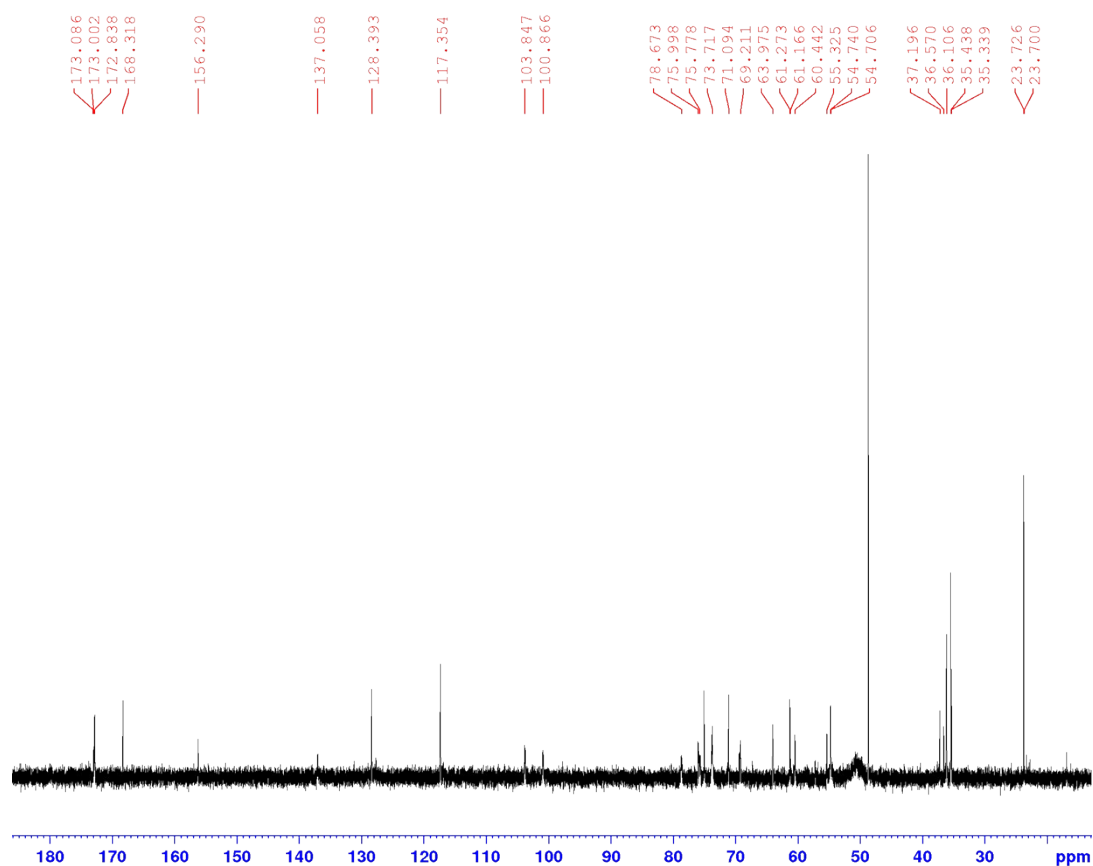

Figure S71  $^{13}\text{C}$  NMR Spectrum of **32**,  $\text{CDCl}_3$ , 101 MHz

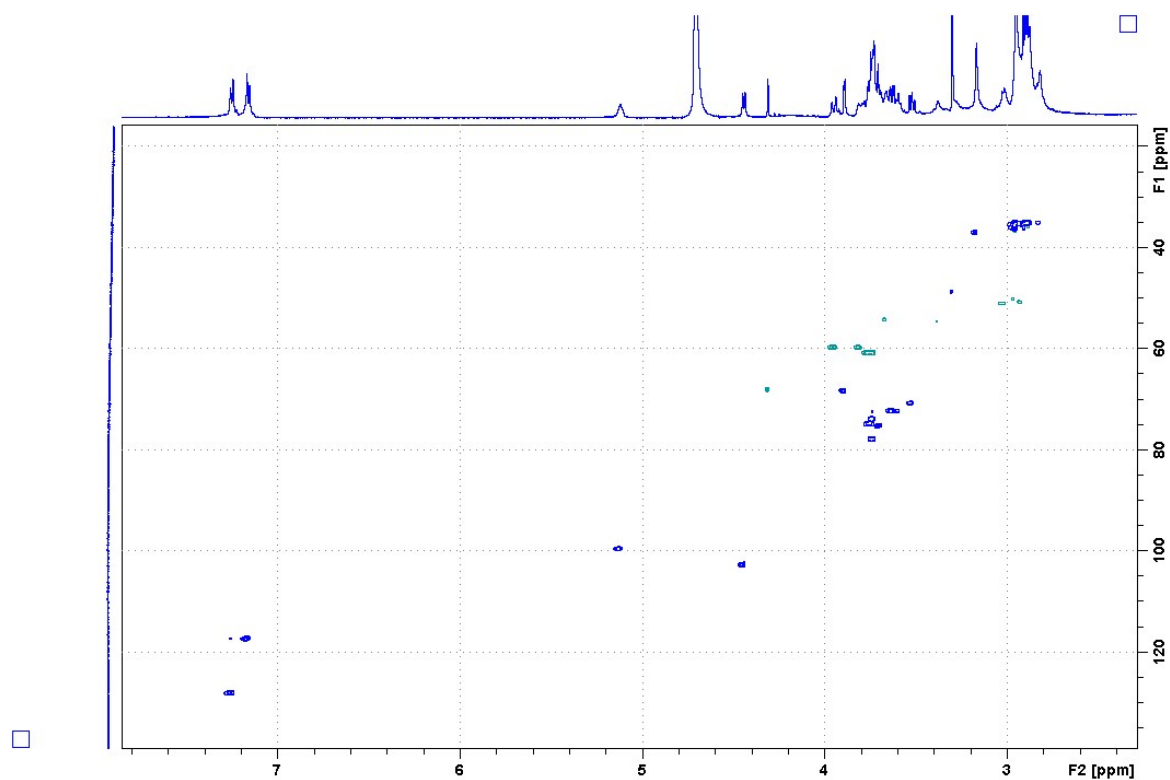

**Figure S72** HSQC NMR Spectrum of **32**,  $\text{CDCl}_3$ , 101 MHz

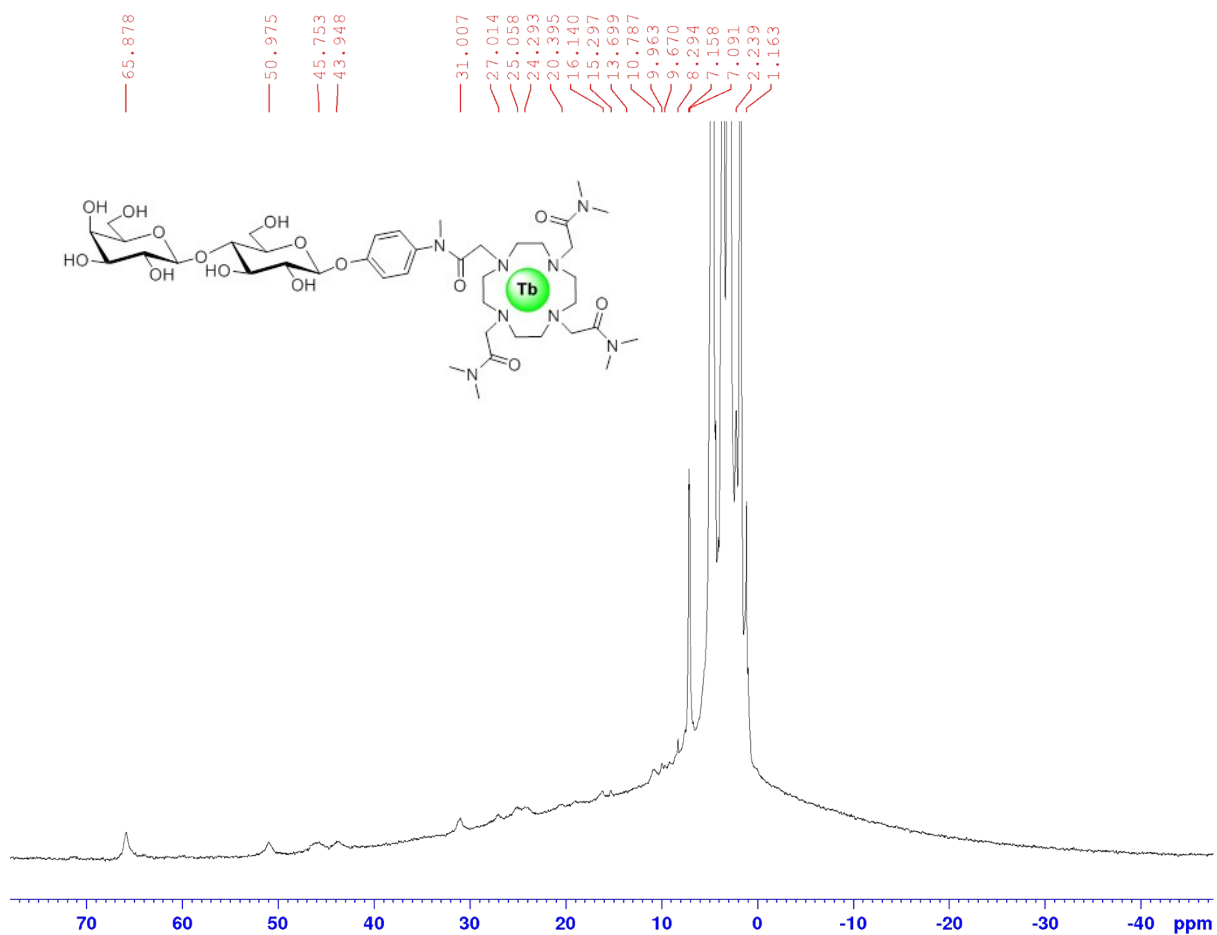

**Figure S73**  $^1\text{H}$  NMR Spectrum of **5Tb**,  $\text{D}_2\text{O}$  400 MHz

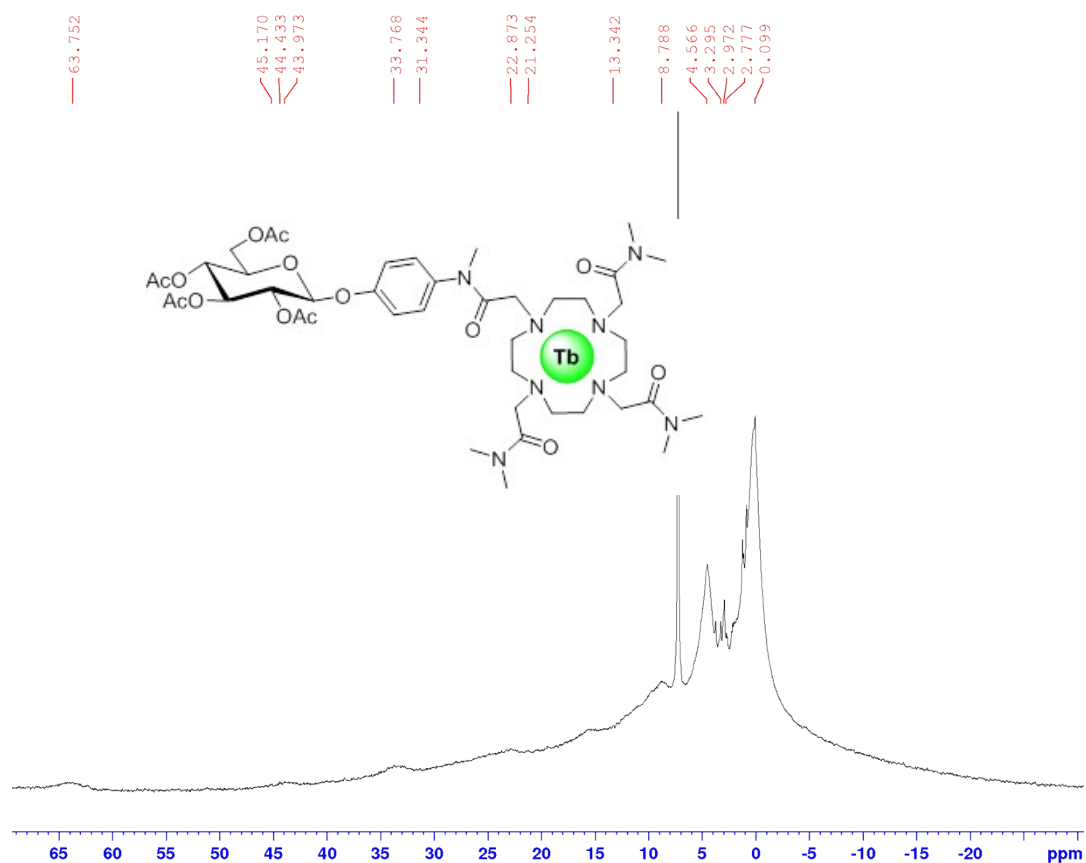

**Figure S74**  $^1\text{H}$  NMR Spectrum of **6Tb**,  $\text{CDCl}_3$ , 400 MHz

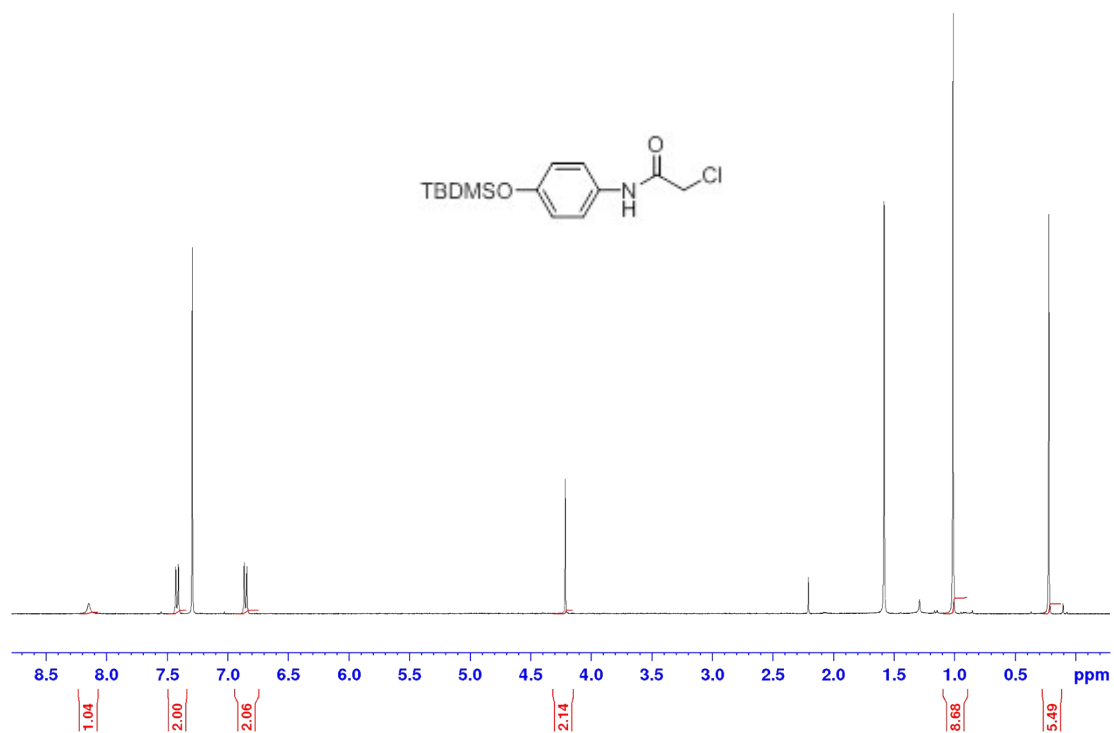

**Figure S75**  $^1\text{H}$  NMR Spectrum of **34**,  $\text{CDCl}_3$ , 400 MHz

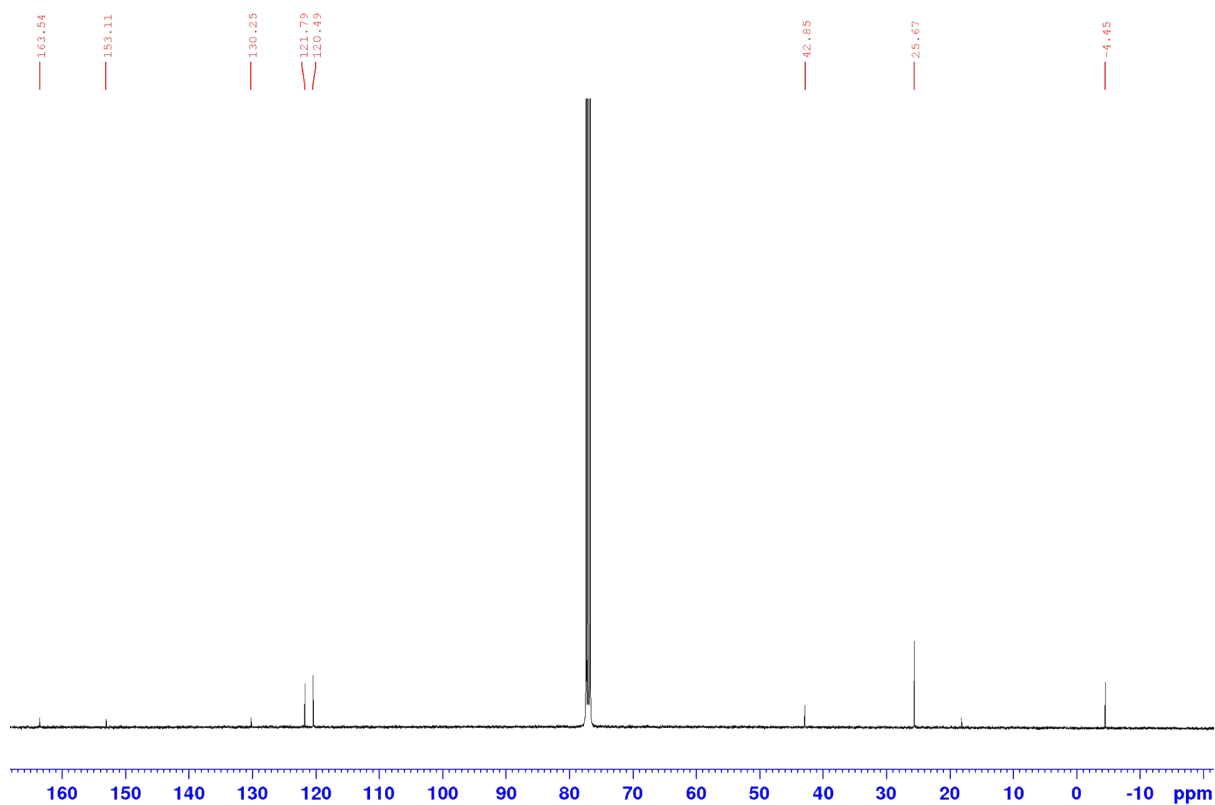

**Figure S76**  $^{13}\text{C}$  NMR Spectrum of **34**,  $\text{CDCl}_3$ , 101 MHz

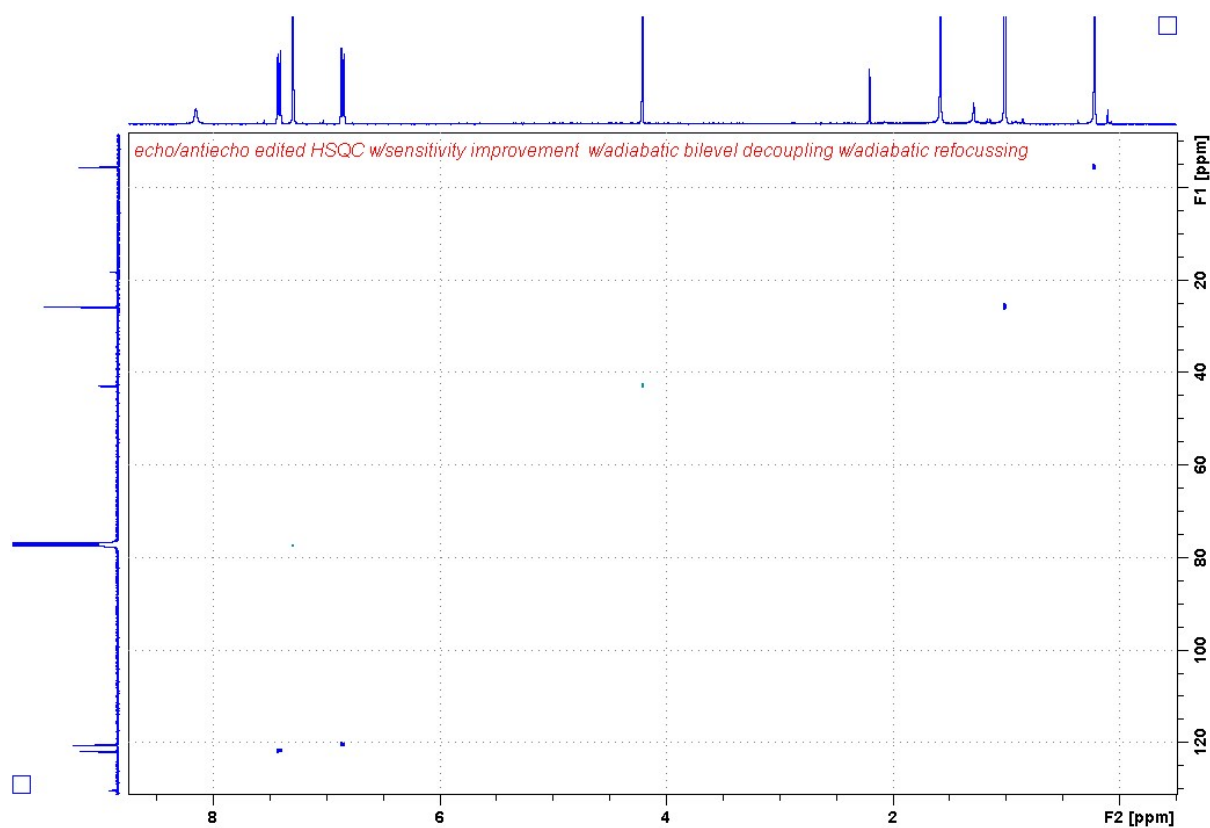

**Figure S77** HSQC NMR Spectrum of **34**,  $\text{CDCl}_3$ , 101 MHz

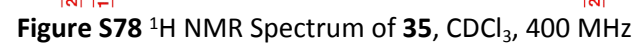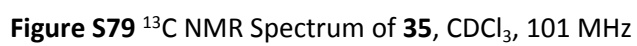

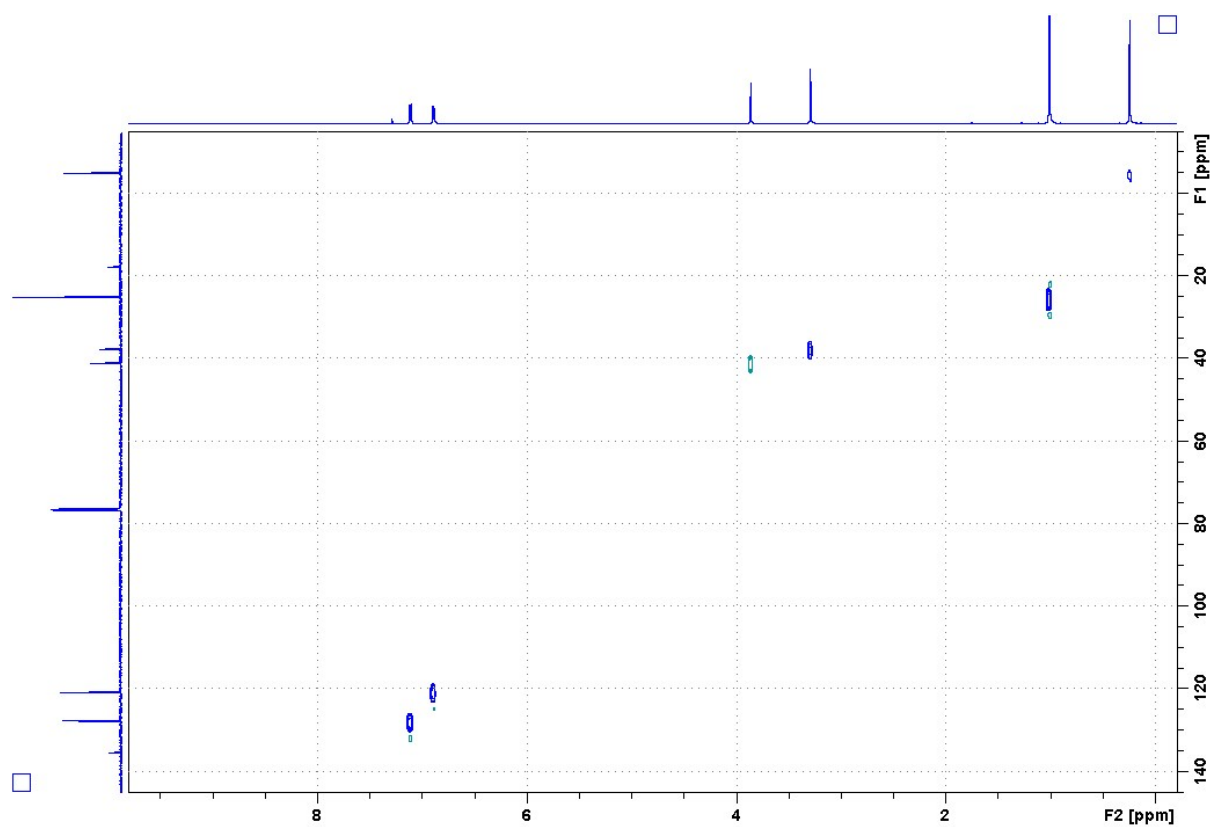

**Figure S80** HSQC NMR Spectrum of **35**,  $\text{CDCl}_3$ , 101 MHz

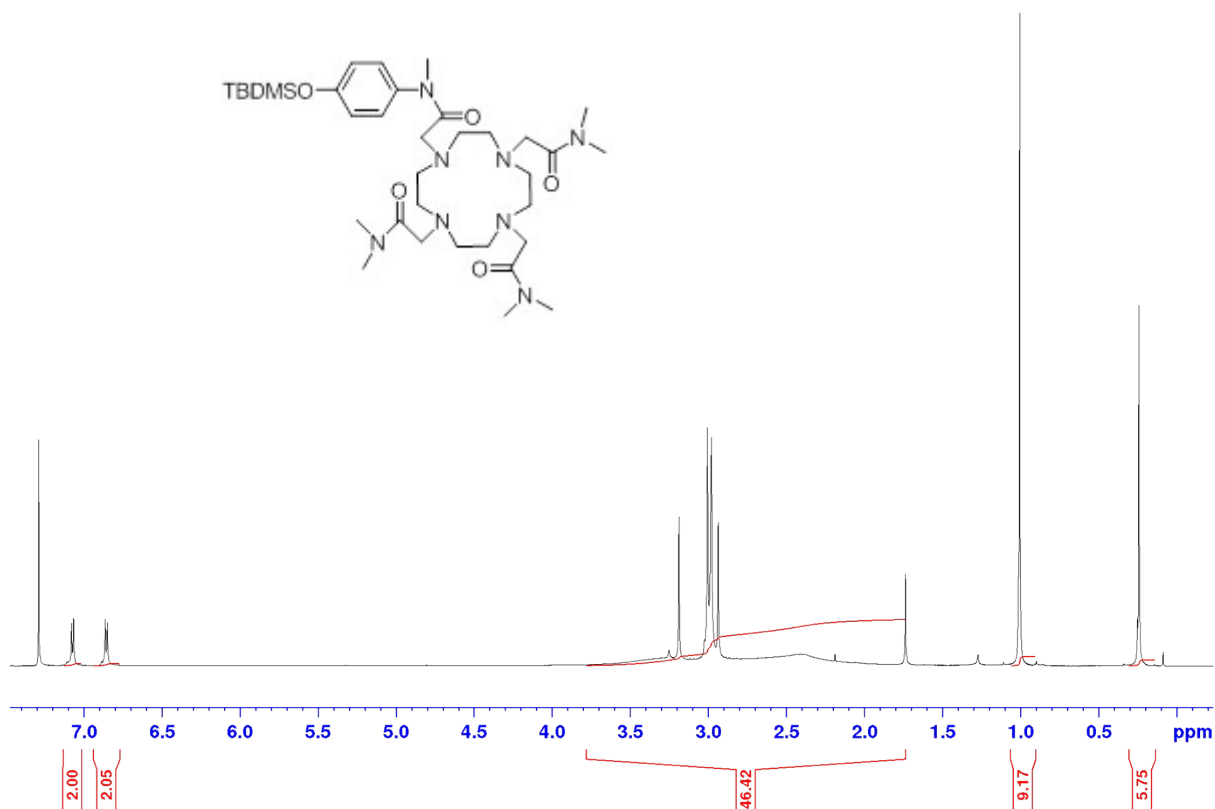

**Figure S81**  $^1\text{H}$  NMR Spectrum of **36**,  $\text{CDCl}_3$ , 400 MHz

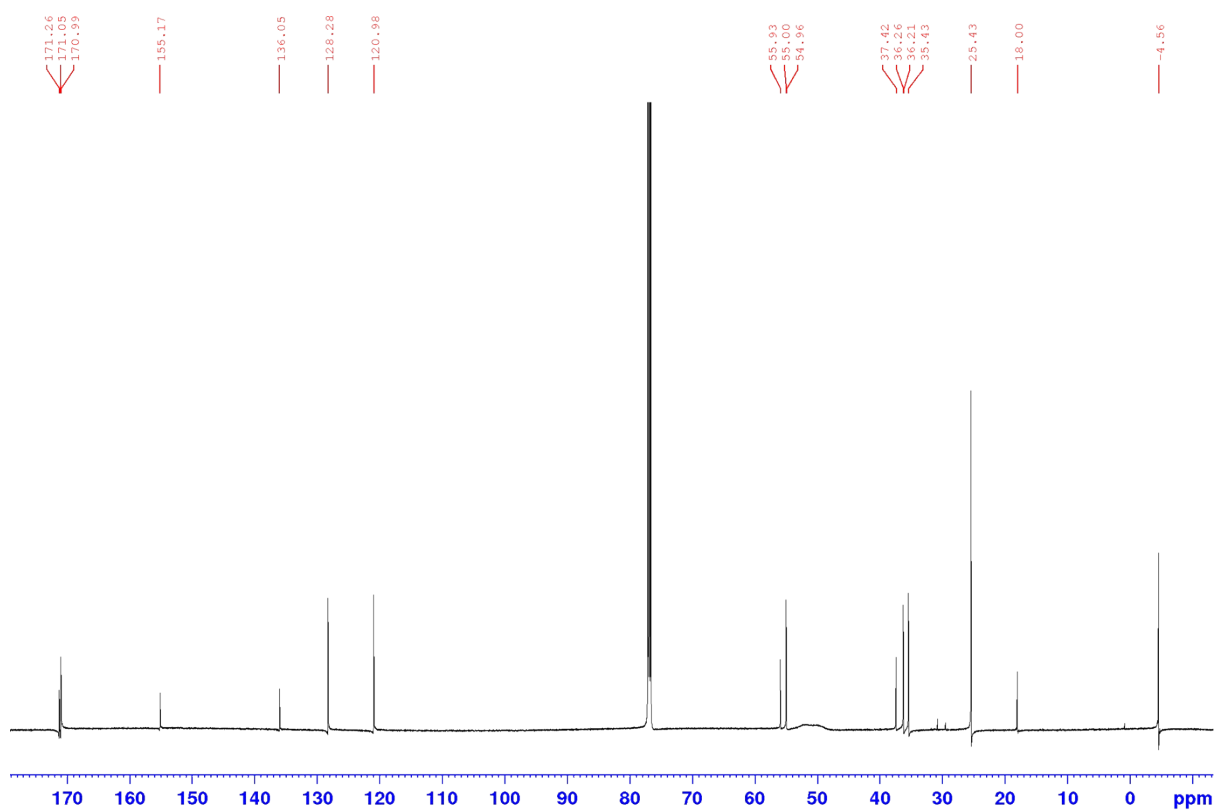

**Figure S82** <sup>13</sup>C NMR Spectrum of **36**, CDCl<sub>3</sub>, 101 MHz

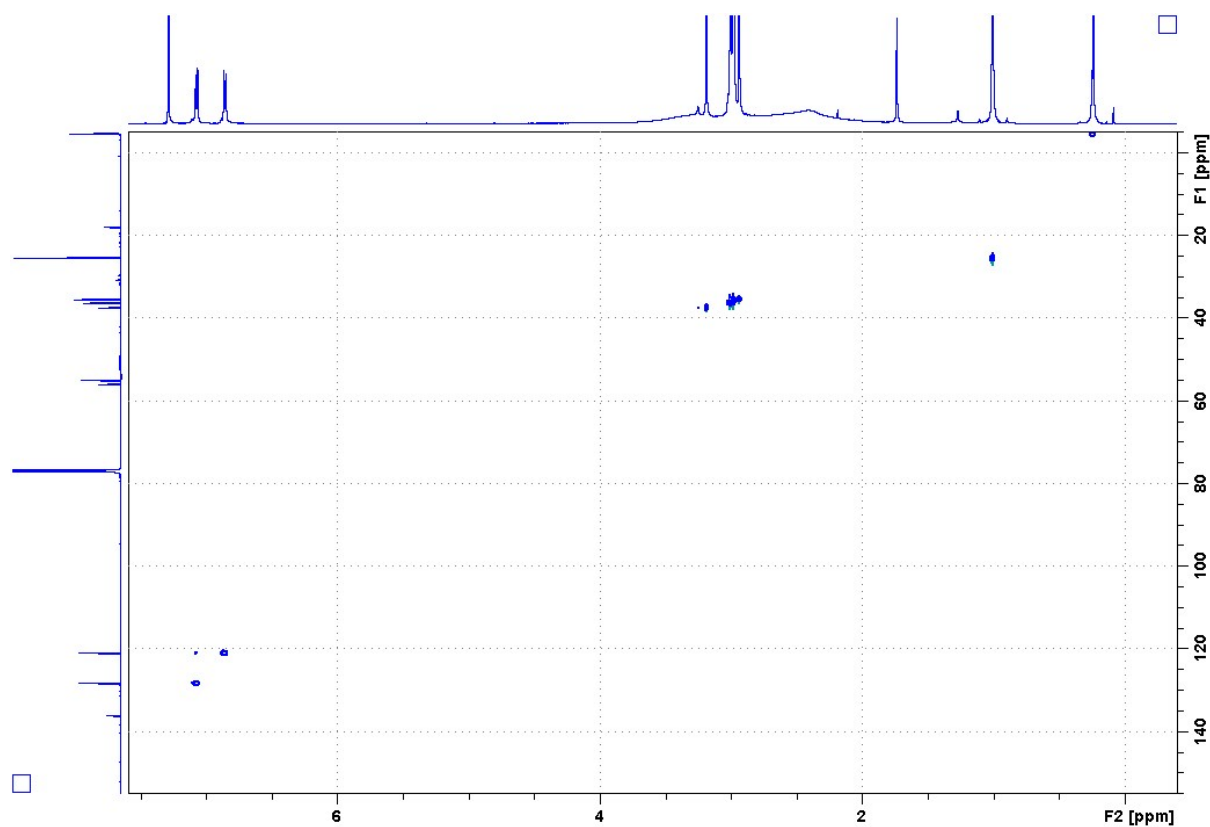

**Figure S83** HSQC NMR Spectrum of **36**, CDCl<sub>3</sub>, 101 MHz

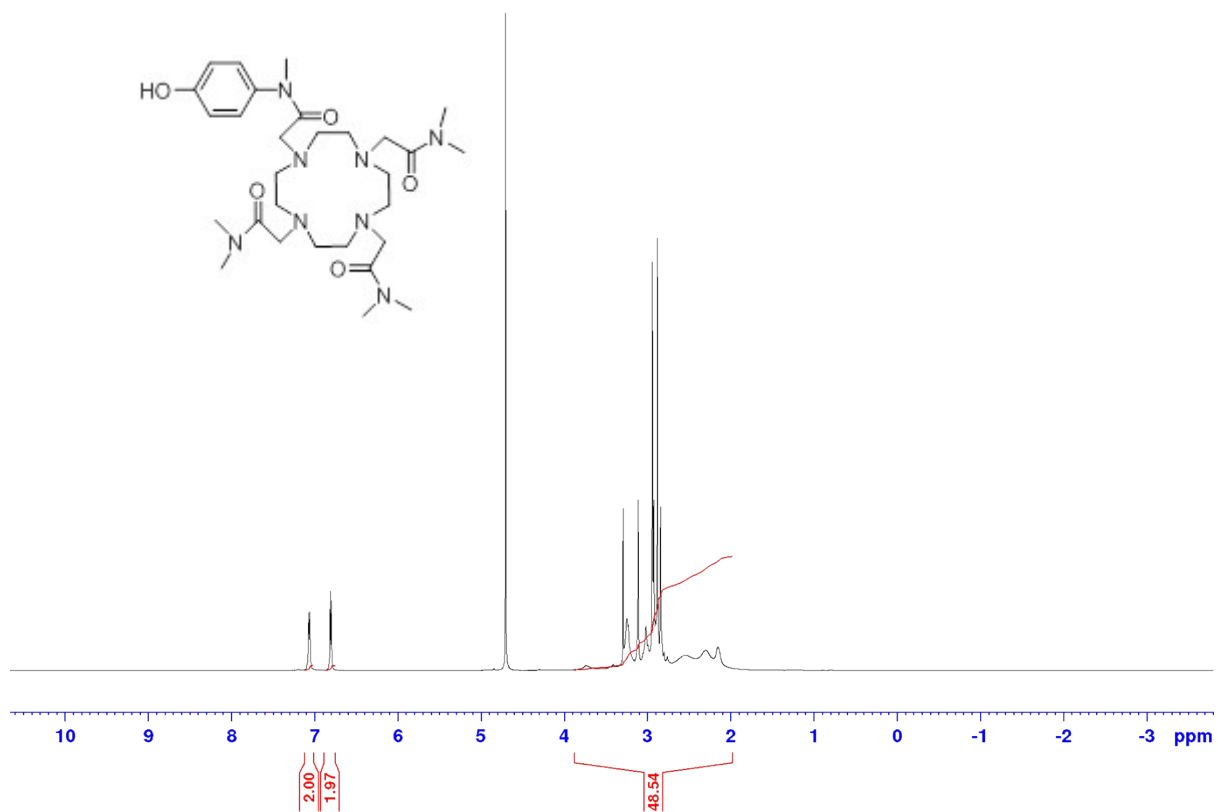

**Figure S84** <sup>1</sup>H NMR Spectrum of **37**, D<sub>2</sub>O, 400 MHz

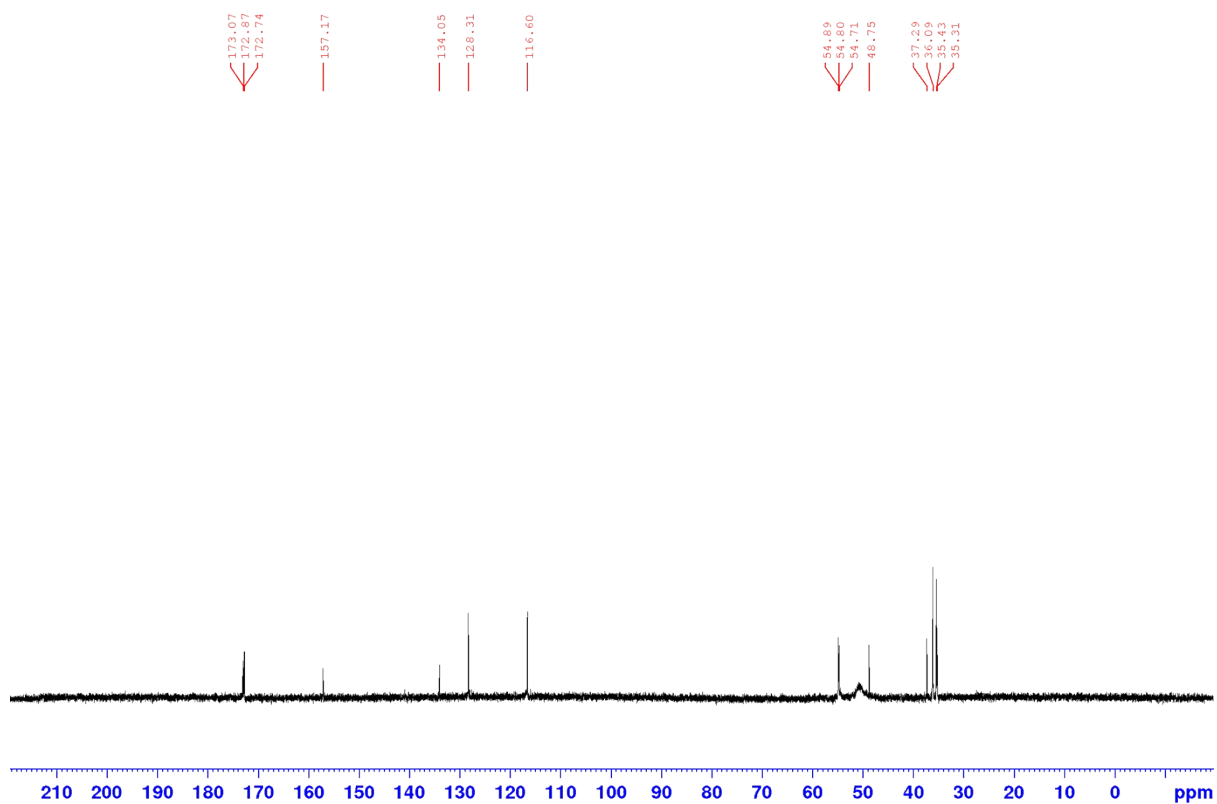

**Figure S85** <sup>13</sup>C NMR Spectrum of **37**, D<sub>2</sub>O, 101 MHz

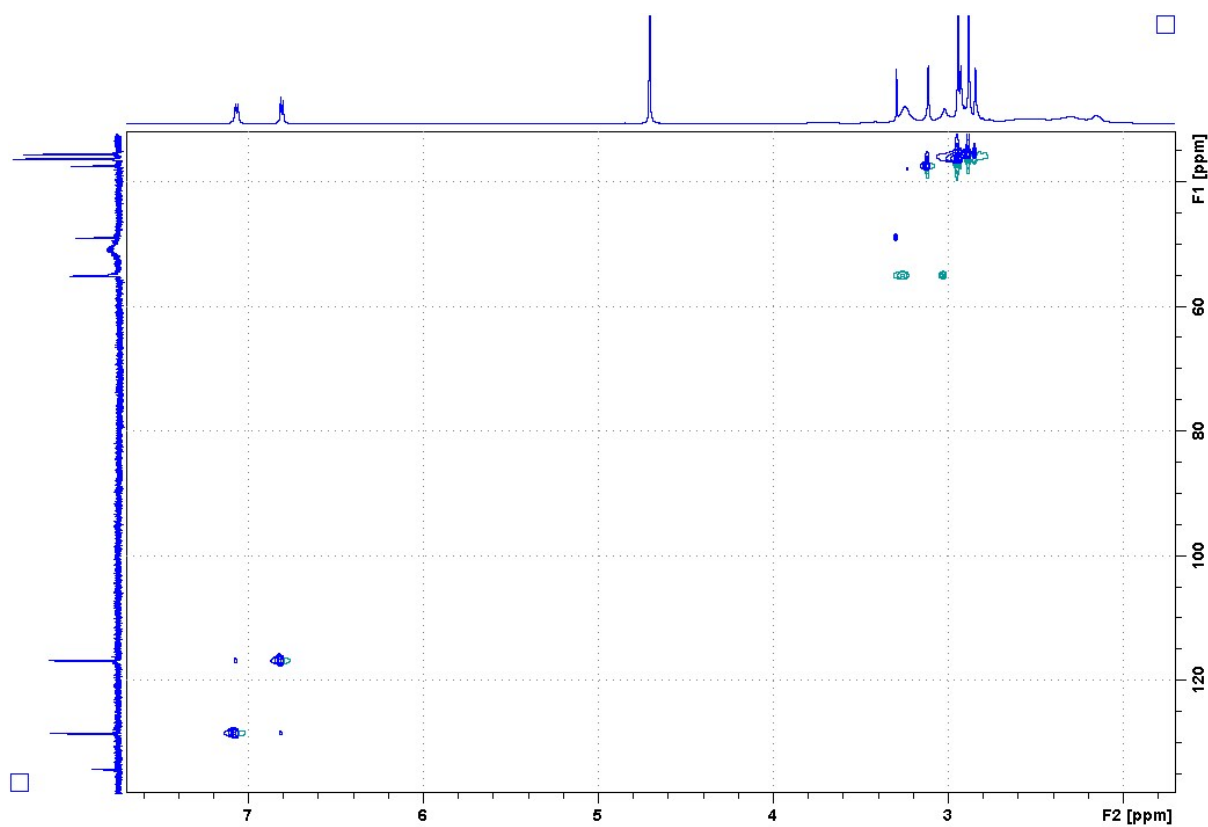

**Figure S86** HSQC NMR Spectrum of **37**, D<sub>2</sub>O, 101 MHz

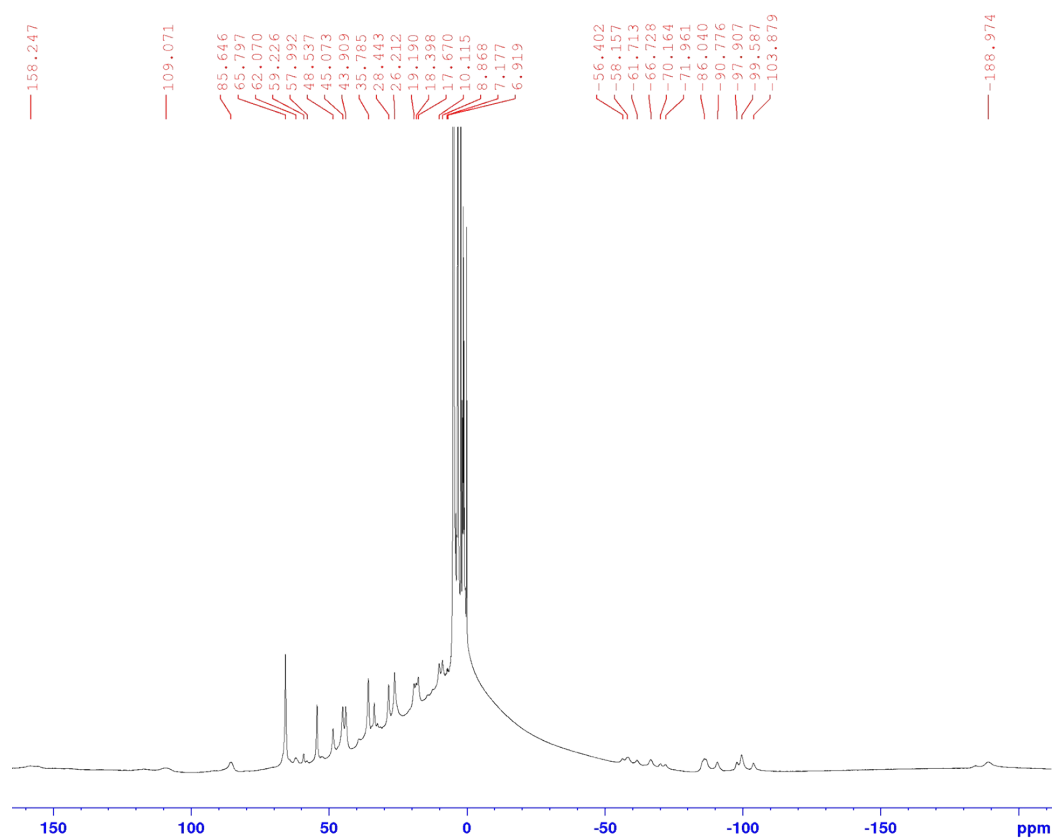

**Figure S87** <sup>1</sup>H NMR Spectrum of **7Tb**, D<sub>2</sub>O, 400 MHz

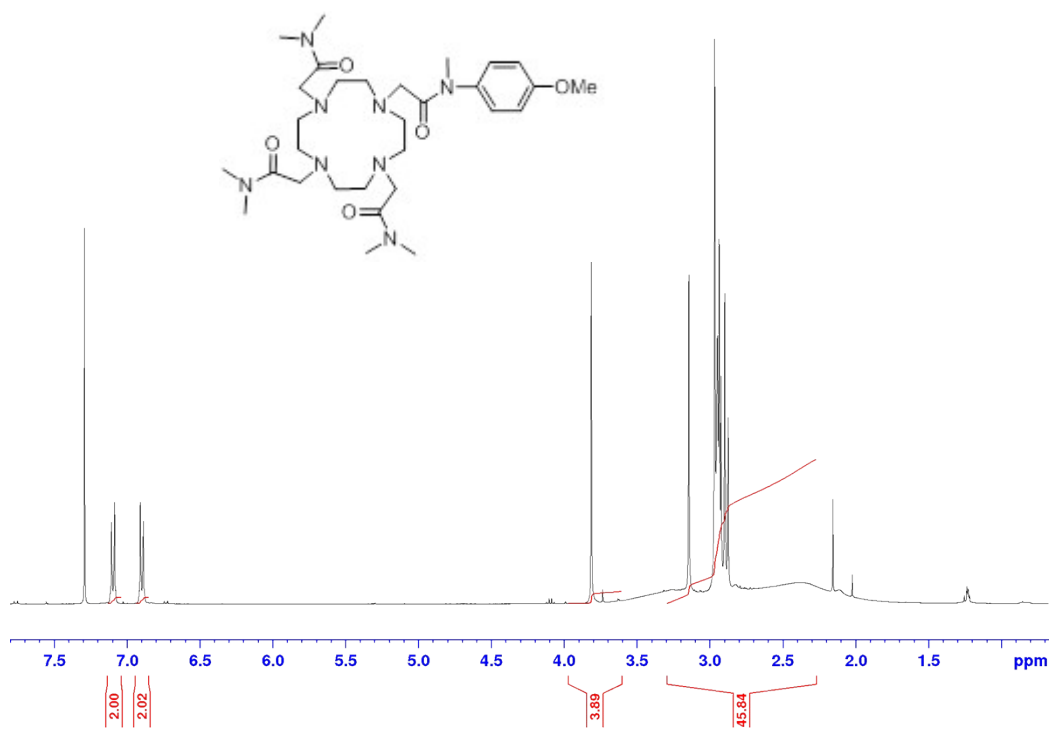

**Figure S88** <sup>1</sup>H NMR Spectrum of **40**, CDCl<sub>3</sub>, 400 MHz

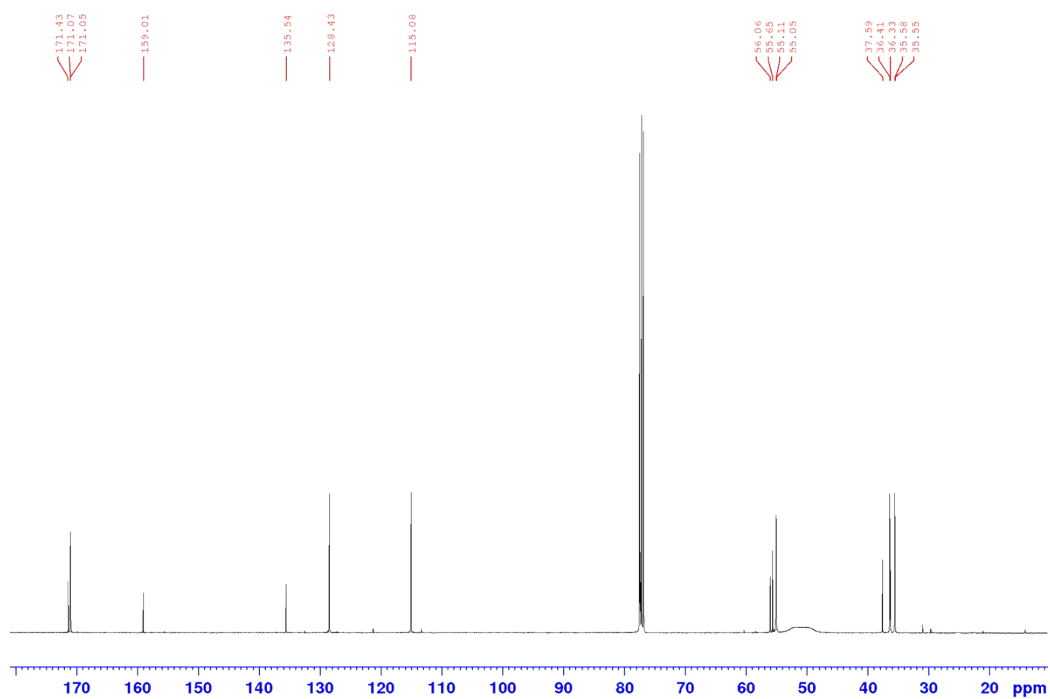

**Figure S89** <sup>13</sup>C NMR Spectrum of **40**, CDCl<sub>3</sub>, 101 MHz

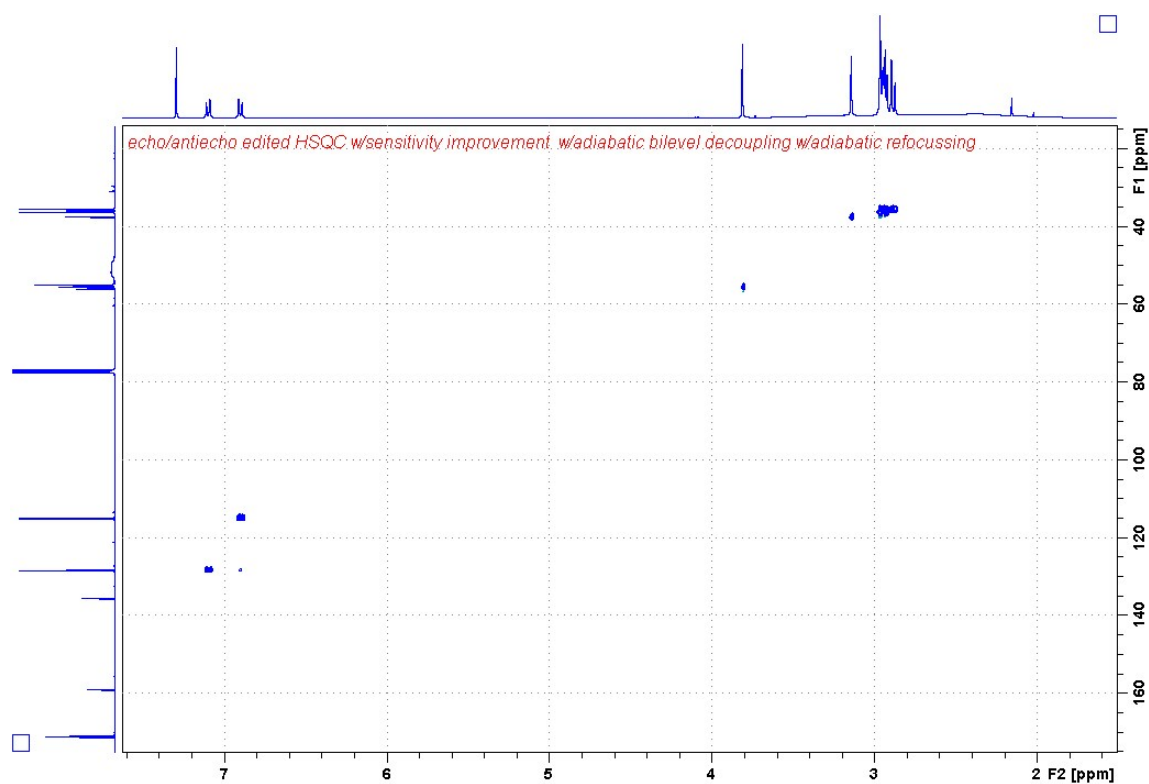

Figure S90 HSQC NMR Spectrum of **40**, CDCl<sub>3</sub>, 101 MHz

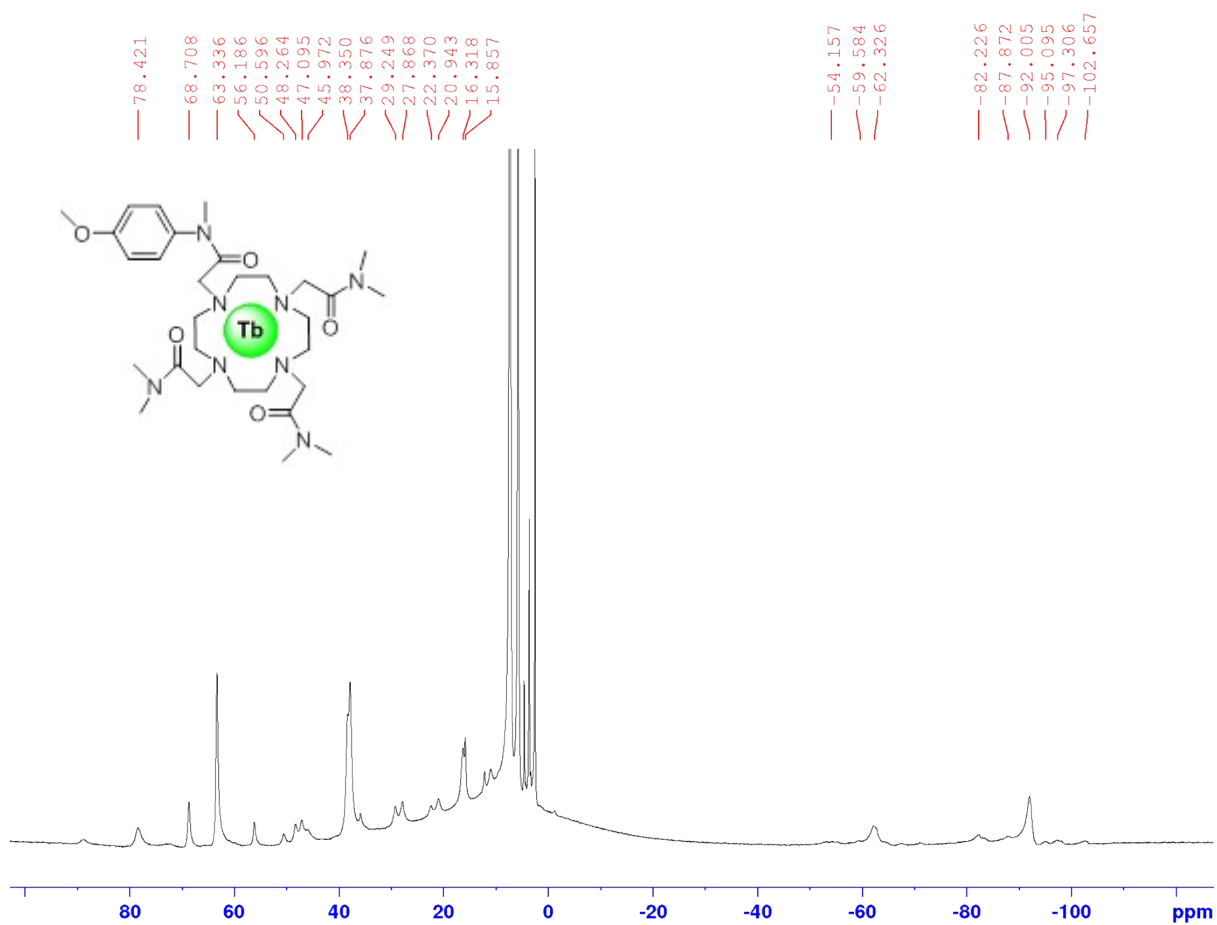

Figure S90 <sup>1</sup>H NMR Spectrum of **8Tb**, CDCl<sub>3</sub>, 400 MHz
